# Supplementary material for: Ancient genomes from the Himalayas illuminate the genetic history of Tibetans and their Tibeto-Burman speaking neighbors
Source: Nat Commun. 2022 Mar 8;13:1203. doi: 10.1038/s41467-022-28827-2 (PMC8904508; doi:10.1038/s41467-022-28827-2)
Supplement: Supplementary file 4 — Supplementary Data 1-11 [file 41467_2022_28827_MOESM4_ESM.xlsx]

## Sheet: SD1
Supplementary Data 1. Per library sequencing summary information of aMMD genomes generated in this study. We report sequencing strategy (WGS/1240K capture/50K capture), UDG treatment, damage patterns, and contamination estimates for each library.
Individual.ID	Sample.ID	Library.ID	Sex	Strategy	Library.Type	nr.all	nr.nodup.q30	pr.endo%	target.cov	nsites.target.covered	5'C>T	3'G>A	X.contam±1SE	MT.contam(95%CI)
U1	U1	SUI001.A0101	F	1240K	single-strand non-UDG	22940858	10910112	93.0329	2.31816	760179	0.202555	0.0124865	0.2257 ± 0.0045	0.02 (0.01 - 0.03)
U2	U2	SUI002.A0101	F	1240K	single-strand non-UDG	23847557	1819503	20.1501	0.53844	303735	0.242941	0.0111324	0.2139 ± 0.0116	0.09 (0.07 - 0.11)
CNE1	CNE1	CHO001.A0101	M	1240K	non-UDG	40144016	15837768	37.414	4.64788	1036310	0.205418	0.141003	0.0111 ± 0.0016	0.01 (0.00 - 0.02)
CNE1	CNE1	CHO001.A0101	M	WGS	non-UDG	406659868	76627669	23.8635	1.69727		0.0848873	0.083627	0.0071 ± 0.0009	0.01 (0.00 - 0.02)
C2	C2	CHO002.A0101	U	1240K	non-UDG	6481279	7804	0.844	0.00173	1689	0.0184171	0.024377	NA	NA
C3	C3	CHO003.A0101	M	1240K	non-UDG	3797175	259263	12.661	0.05744	67850	0.287355	0.281935	-0.0083 ± 0.0062	NA
L1	L1	LUB001.A0101	F	1240K	UDG-half	38385082	2421491	4.456	0.476	424006	0.151773	0.134247	0.1805 ± 0.0105	0.00 (0.00 - 0.01)
L2	L2	LUB002.A0101	F	1240K	UDG-half	63053745	5670094	3.421	1.20563	626916	0.190789	0.186217	0.2013 ± 0.0070	0.01 (0.00 - 0.02)
R1	R1	R1_OU	F	50K	non-UDG	165144558	3033261	10.4302	2.21517	39454	0.137963	0.140275	0.1467 ± 0.0115	0.02 (0.00 - 0.05)
R1	R1	RHI002.A0101	F	1240K	non-UDG	37868407	8901641	34.672	3.65244	927055	0.15518	0.09579	0.2240 ± 0.0039	0.01 (0.00 - 0.02)
R2_R7	R2	R2_OU	F	50K	non-UDG	164067212	10385565	23.4329	5.63051	45231	0.12257	0.12838	0.1754 ± 0.0078	0.00 (0.00 - 0.02)
R2_R7	R2	RHI001.A0101	F	1240K	non-UDG	43240115	15062629	37.546	5.44207	983795	0.13169	0.101956	0.2407 ± 0.0037	0.01 (0.00 - 0.02)
R2_R7	R2	RHI001.A0101	F	WGS	non-UDG	285530800	23678228	10.0001	0.448831		0.0501617	0.0499697	0.1883 ± 0.0064	0.01 (0.00 - 0.02)
R2_R7	R2	RHI001.A0102	F	WGS	UDG-half	189504308	23524304	14.043	0.35336		0.0467675	0.0492822	0.0719 ± 0.0008	0.01 (0.00 - 0.02)
R2_R7	R7	RHI004.A0101	F	1240K	non-UDG	35406057	3108299	22.314	1.40224	656287	0.160986	0.0948858	0.1681 ± 0.0050	0.01 (0.00 - 0.02)
R5	R5	R5_OU	M	50K	non-UDG	177744160	1144865	5.68885	0.504792	20073	0.171641	0.180264	0.1237 ± 0.0426	0.00 (0.00 - 0.01)
R5	R5	RHI003.A0101	M	1240K	non-UDG	35551272	3084089	26.545	0.89892	538543	0.20175	0.146145	0.0234 ± 0.0049	0.01 (0.00 - 0.02)
R8	R8	R8_OU	F	50K	non-UDG	154680100	1096427	4.15199	0.804565	26544	0.129904	0.128724	0.1361 ± 0.0200	0.01 (0.00 - 0.03)
R8	R8	RHI005.A0101	F	1240K	non-UDG	36777689	4743250	27.625	1.86219	769690	0.144771	0.0967581	0.1946 ± 0.0047	0.01 (0.00 - 0.02)
KM4	KM4	KYA001.A0101	M	1240K	non-UDG	40190171	21169466	40.225	5.67054	1064534	0.10569	0.0694622	0.0034 ± 0.0011	0.01 (0.00 - 0.02)
KM4	KM4	KYA001.A0101	M	WGS	non-UDG	876244396	266731450	54.8756	6.61145		0.100008	0.102571	0.0157 ± 0.0007	0.01 (0.00 - 0.02)
KS20_KS25	KS20	KS20_OU	M	50K	non-UDG	63197661	14440219	60.3085	13.3937	46906	0.0693109	0.0705852	0.0057 ± 0.0018	0.01 (0.00 - 0.02)
KS20_KS25	KS20	KYA002.A0101	M	1240K	non-UDG	43548098	25668136	36.598	7.56355	1104049	0.0682212	0.0273903	0.0041 ± 0.0008	0.01 (0.00 - 0.02)
KS20_KS25	KS20	KYA002.A0102	M	WGS	UDG-half	50824114	32750253	75.274	0.67094		0.0278987	0.0222686	0.0008 ± 0.0005	0.01 (0.00 - 0.02)
KS20_KS25	KS25	KS25_OU	M	50K	non-UDG	68707055	18531201	64.3293	5.53503	47160	0.0600547	0.0569318	0.0048 ± 0.0018	0.01 (0.00 - 0.03)
KS20_KS25	KS25	KYA005.A0101	M	1240K	non-UDG	42149674	20967094	37.435	4.21633	1058137	0.0565047	0.028087	0.0014 ± 0.0009	0.01 (0.00 - 0.02)
KS20_KS25	KS25	KYA005.A0102	M	WGS	UDG-half	78497093	46257378	72.351	0.91112		0.0246806	0.0210207	0.0016 ± 0.0004	0.01 (0.00 - 0.02)
KS21_KS23_KS4	KS21	KS21_OU	F	50K	non-UDG	52942893	16152565	68.6388	13.4867	46890	0.0584367	0.0600792	0.2030 ± 0.0057	0.01 (0.00 - 0.02)
KS21_KS23_KS4	KS21	KYA003.A0101	F	1240K	non-UDG	38549949	23545343	38.618	7.41907	1052948	0.0570066	0.0364953	0.2495 ± 0.0034	0.01 (0.00 - 0.02)
KS21_KS23_KS4	KS21	KYA003.A0102	F	WGS	UDG-half	79059555	43337031	63.455	0.77659		0.0248987	0.0229571	0.0744 ± 0.0007	0.01 (0.00 - 0.02)
KS21_KS23_KS4	KS23	KS23_OU	F	50K	non-UDG	79559262	8702672	47.622	1.2544	36052	0.0899506	0.0913811	0.1835 ± 0.0082	0.00 (0.00 - 0.01)
KS21_KS23_KS4	KS23	KYA004.A0101	F	1240K	non-UDG	41205032	13288102	34.327	1.90229	809803	0.0863431	0.0389188	0.1510 ± 0.0038	0.01 (0.00 - 0.02)
KS21_KS23_KS4	KS23	KYA004.A0102	F	WGS	UDG-half	92710382	43087198	57.51	0.8156		0.0391413	0.0323343	0.0773 ± 0.0009	0.00 (0.00 - 0.01)
KS21_KS23_KS4	KS4	KS4_OU	F	50K	non-UDG	34118556	2737691	23.1414	1.86	39099	0.130437	0.13304	0.1632 ± 0.0110	0.00 (0.00 - 0.02)
KS21_KS23_KS4	KS4	KYA010.A0101	F	1240K	non-UDG	30160381	5616550	24.614	1.93022	820171	0.125393	0.0300058	0.1790 ± 0.0043	0.01 (0.00 - 0.02)
KS26	KS26	KS26_OU	F	50K	non-UDG	76018525	17648311	62.8534	6.06241	47111	0.0600847	0.0593232	0.1817 ± 0.0047	0.02 (0.02 - 0.03)
KS26	KS26	KYA006.A0101	F	1240K	non-UDG	35958079	19904211	34.697	4.47137	1032780	0.058922	0.0294872	0.2312 ± 0.0034	0.01 (0.00 - 0.02)
KS26	KS26	KYA006.A0101	F	WGS	non-UDG	259006504	109243673	57.549	3.36959		0.0239547	0.0239411	0.2277 ± 0.0019	0.02 (0.01 - 0.03)
KS5	KS5	KYA007.A0101	F	1240K	non-UDG	43664717	23399700	36.041	4.37115	1039471	0.0803486	0.0360636	0.2355 ± 0.0034	0.02 (0.01 - 0.03)
KS5	KS5	KYA007.A0101	F	WGS	non-UDG	414224746	181578598	63.2276	5.18344		0.0387006	0.0386785	0.2635 ± 0.0018	0.00 (0.00 - 0.01)
KS8	KS8	KS8_OU	M	50K	non-UDG	72912530	4323229	54.1135	2.4304	41360	0.111865	0.109808	0.0187 ± 0.0062	0.00 (0.00 - 0.02)
KS8	KS8	KYA008.A0101	M	1240K	non-UDG	44040712	16490532	38.485	3.2975	1014829	0.109617	0.0669776	0.0056 ± 0.0015	0.01 (0.00 - 0.02)
KS8	KS8	KYA008.A0102	M	WGS	UDG-half	88000452	29843530	40.714	0.51617		0.052923	0.0486889	0.0010 ± 0.0009	0.00 (0.00 - 0.01)
KS9	KS9	KS9_OU	M	50K	non-UDG	40425290	2883480	41.8145	1.0821	32550	0.0759001	0.0783529	0.0245 ± 0.0106	0.01 (0.00 - 0.02)
KS9	KS9	KYA009.A0101	M	1240K	non-UDG	34896097	10057320	36.714	1.66674	795041	0.0755558	0.0442112	0.0013 ± 0.0013	0.01 (0.00 - 0.02)
M2113	M2113	MEB001.A0101	F	1240K	non-UDG	38268254	22374694	39.523	7.38103	1059489	0.0795244	0.0503965	0.2555 ± 0.0034	0.01 (0.00 - 0.02)
M2113	M2113	MEB001.A0101	F	WGS	non-UDG	258146397	97190582	46.2486	2.3578		0.0322313	0.0321398	0.2301 ± 0.0021	0.01 (0.00 - 0.02)
M241	M241	M241_OU	F	50K	non-UDG	34058495	921941	13.0624	0.32319	14658	0.166657	0.171439	0.1295 ± 0.0370	0.04 (0.02 - 0.06)
M241	M241	MEB004.A0101	F	1240K	non-UDG	4099365	853118	34.268	0.23431	235549	0.184767	0.0866274	0.1479 ± 0.0166	0.02 (0.01 - 0.03)
M295	M295	M295_OU	F	50K	non-UDG	64360198	11285127	39.3497	8.56904	46227	0.0890821	0.088272	0.1767 ± 0.0064	0.00 (0.00 - 0.01)
M295	M295	MEB002.A0101	F	1240K	non-UDG	38851496	19126620	39.594	6.76848	1035096	0.0915683	0.0554356	0.2507 ± 0.0035	0.01 (0.00 - 0.02)
M295	M295	MEB002.A0102	F	WGS	UDG-half	98251983	34223061	40.06	0.60613		0.0329796	0.0345992	0.0773 ± 0.0008	0.01 (0.00 - 0.02)
M354	M354	M354_OU	M	50K	non-UDG	59904726	3870875	15.2805	1.46403	36925	0.0945069	0.0912725	0.0393 ± 0.0115	0.03 (0.02 - 0.05)
M354	M354	MEB007.A0101	M	1240K	non-UDG	30257903	8181351	39.321	2.53937	921908	0.0969377	0.0702833	0.0200 ± 0.0022	0.02 (0.01 - 0.03)
M368	M368	MEB003.A0101	F	1240K	non-UDG	48410697	28264784	36.997	5.23936	1046434	0.080094	0.0537019	0.2415 ± 0.0033	0.01 (0.00 - 0.02)
M368	M368	MEB003.A0101	F	WGS	non-UDG	803249051	235726764	60.105	6.05422		0.082674	0.0838174	0.2730 ± 0.0019	0.02 (0.01 - 0.03)
M4580	M4580	M4580_OU	F	50K	non-UDG	71363213	3265694	28.3508	0.654393	25019	0.109645	0.109119	0.1053 ± 0.0151	0.01 (0.00 - 0.01)
M4580	M4580	MEB009.A0101	F	1240K	non-UDG	30361959	7103143	37.89	1.64918	720017	0.11261	0.0594955	0.1382 ± 0.0042	0.01 (0.00 - 0.02)
M4681	M4681	M4681_OU	F	50K	non-UDG	66627779	4371867	36.8824	4.441	43357	0.0800309	0.0808849	0.2147 ± 0.0098	0.04 (0.02 - 0.06)
M4681	M4681	MEB010.A0101	F	1240K	non-UDG	35580115	13050282	39.759	5.34328	1022637	0.0864983	0.0499282	0.2403 ± 0.0035	0.01 (0.00 - 0.02)
M63_M339_M359	M339	M339_OU	M	50K	non-UDG	64098536	3511063	15.1188	1.251	34672	0.0983737	0.103479	0.0454 ± 0.0147	0.02 (0.01 - 0.04)
M63_M339_M359	M339	MEB005.A0101	M	1240K	non-UDG	31003088	7512000	36.454	2.10122	851494	0.111742	0.0671454	0.0088 ± 0.0023	0.01 (0.00 - 0.02)
M63_M339_M359	M359	M359_OU	M	50K	non-UDG	54561468	2209305	21.024	0.784272	27425	0.0972137	0.097228	0.0338 ± 0.0189	0.00 (0.00 - 0.02)
M63_M339_M359	M359	MEB008.A0101	M	1240K	non-UDG	33123447	6330100	36.538	1.61325	755023	0.1075	0.0719898	0.0037 ± 0.0022	0.02 (0.01 - 0.03)
M3490	M3490	MEB006.A0101	F	1240K	non-UDG	3543259	463668	22.934	0.18948	192849	0.113161	0.0777125	0.2006 ± 0.0208	0.04 (0.03 - 0.05)
S10_S13	S13	S13_OU	M	50K	non-UDG	82779438	5460220	56.9775	6.31668	43326	0.134968	0.144512	0.0126 ± 0.0038	0.03 (0.01 - 0.09)
S10_S13	S13	SZG002.A0101	M	1240K	non-UDG	41910290	18298447	37.097	6.77132	1074512	0.151311	0.0820751	0.0064 ± 0.0011	0.01 (0.00 - 0.02)
S143_S173	S143	S143_OU	M	50K	non-UDG	75731205	12736990	43.5261	17.8766	46810	0.0815882	0.0799282	0.0062 ± 0.0018	0.03 (0.02 - 0.06)
S143_S173	S143	SZG003.A0101	M	1240K	non-UDG	41267666	25432764	31.749	7.60801	1065336	0.0827949	0.0364646	0.0033 ± 0.0007	0.01 (0.00 - 0.02)
S143_S173	S143	SZG003.A0102	M	WGS	UDG-half	69683921	49146583	83.983	1.06772		0.0286851	0.0192841	0.0012 ± 0.0006	0.01 (0.00 - 0.02)
S143_S173	S173	SZG008.A0101	M	1240K	non-UDG	5063384	37995	0.322	0.00663	8394	0.265768	0.260565	NA	NA
S153_S183	S153	SZG005.A0101	M	1240K	non-UDG	34631638	4025118	24.726	1.68698	772548	0.189107	0.103666	0.0042 ± 0.0019	0.01 (0.00 - 0.02)
S153_S183	S183	S183_OU	M	50K	non-UDG	57709035	1751015	28.3324	2.63765	38263	0.146967	0.145534	0.0411 ± 0.0090	0.13 (0.03 - 0.32)
S153_S183	S183	SZG010.A0101	M	1240K	non-UDG	34448436	8411654	28.537	3.77761	976136	0.157848	0.081221	0.0274 ± 0.0020	0.01 (0.00 - 0.02)
S18_S20_S21_S22	S18	SZG009.A0101	F	1240K	non-UDG	33587427	5447911	25.17	2.54862	868599	0.187882	0.110555	0.2032 ± 0.0040	0.01 (0.00 - 0.02)
S18_S20_S21_S22	S21	S21_OU	F	50K	non-UDG	60425390	2933576	42.6243	4.80913	41146	0.170119	0.170995	0.1733 ± 0.0102	0.01 (0.00 - 0.20)
S18_S20_S21_S22	S20	SZG011.A0101	F	1240K	non-UDG	33941214	4192259	23.134	1.89755	776362	0.204513	0.14302	0.1918 ± 0.0044	0.04 (0.02 - 0.06)
S18_S20_S21_S22	S21	SZG012.A0101	F	1240K	non-UDG	36496633	13763105	35.138	6.1646	1028850	0.179929	0.114044	0.2466 ± 0.0035	0.01 (0.00 - 0.02)
S18_S20_S21_S22	S22	SZG013.A0101	F	1240K	non-UDG	4259041	412670	14.429	0.18275	185957	0.201926	0.132252	0.1741 ± 0.0197	0.98 (0.97 - 0.99)
S29_S30	S29	SZG014.A0101	M	1240K	non-UDG	5510124	25484	0.801	0.0074	9152	0.287555	0.295529	NA	NA
S29_S30	S30	SZG015.A0101	M	1240K	non-UDG	4974401	60645	2.834	0.0147	17933	0.281643	0.292407	NA	NA
S36	S36	S36_OU	F	50K	non-UDG	79352959	861179	37.8332	0.138	6852	0.181004	0.183084	0.0332 ± 0.0511	0.01 (0.00 - 0.03)
S36	S36	SZG004.A0101	F	1240K	non-UDG	10588659	1890140	36.194	0.12957	137150	0.192807	0.165512	0.1222 ± 0.0194	0.01 (0.00 - 0.02)
S8	S8	S8_OU	F	50K	non-UDG	48326614	9659271	76.3398	9.99515	45365	0.162154	0.153985	0.1699 ± 0.0071	0.03 (0.01 - 0.10)
S8	S8	SZG001.A0101	F	1240K	non-UDG	40684565	27061418	42.507	7.64011	1066642	0.168268	0.124721	0.2412 ± 0.0033	0.01 (0.00 - 0.02)
S8	S8	SZG001.A0102	F	WGS	UDG-half	57409166	44499416	88.391	0.71646		0.0915215	0.0814991	0.0686 ± 0.0011	0.01 (0.00 - 0.02)
S16	S16	SZG006.A0101	F	1240K	non-UDG	5105833	155711	6.985	0.06444	72313	0.115487	0.0697808	0.1229 ± 0.0408	NA
S163	S163	SZG007.A0101	M	1240K	non-UDG	5127354	291231	9.839	0.11969	128865	0.215719	0.166579	0.0378 ± 0.0267	0.98 (0.97 - 0.99)

## Sheet: SD2
Supplementary Data 2. Per individual information of aMMD genomes generated in this study. We report per individual information including genetic sex, coverage, and uniparental haplogroup, after merging library duplicates (Supplementary Data 4). Six individuals marked in yellow shades are previously published genome data. Four individuals highlighted in red color failed to pass our quality control…
Site	Individual.ID	Sex	WGS.cov	1240K.cov	50K.cov	n1240K.covered	nHO.covered	nIllumina.covered	Y haplogroup ISOGG	Y haplogroup refined	mt haplogroup	relatedness
Suila	U1	F		2.3		760179	386817	144921			M9a1a1c1b1a
Suila	U2	F		0.5		303735	154974	57894			M9a1a1c1	Mother-daughtor of U1
Chokhopani	C1	M	6.6			1142758	589563	221124	O2a2b1a1a6	Oα1c1a1b1a	D4j1b
Chokhopani	CNE1	M	1.7	5.6		1122460	582740	218178	O2a2b1a1a6	Oα1c1	A17
Chokhopani	C2	U		0.002		1624	883	335			N/A
Chokhopani	C3	M		0.057		65423	34845	13417	N/A	N/A	N/A
Kyang	KM4	M	6.6	6.5		1147454	591875	222055	O2a2b1a1a6	Oα1c1a1b1a	F1c1a1a
Kyang	KS20_KS25	M	1.6	12.8	22.9	1138396	589832	220822	O2a2b1a1a6	Oα1c1a1b1a	M9a1b1
Kyang	KS21_KS23_KS4	F	1.6	13.2	21.5	1133899	588511	220072			A6b
Kyang	KS26	F	3.4	5	7.3	1143247	591288	221458			M62a
Kyang	KS5	F	6	7.4		1147439	592337	222103			U2b1
Kyang	KS8	M	0.5	3.6	3.4	1044140	548723	204969	O2a2b1a1a	Oα1c1a1b1a	F1c1a1a	brother of KM4
Kyang	KS9	M		2	1.9	806542	428538	159728	O2a2b1a1a6	Oα1c1a1b1a	M9a1a1c1b1a
Lubrak	L1	F		0.5		376013	203894	74733			F1d
Lubrak	L2	F		1.2		567910	312542	113230			M9a1a1c1b1a
Mebrak	M2113	F	2.4	8.6		1136355	588452	220324			M9a1a1c1b1a
Mebrak	M241	F		1.2	1.3	34741	18650	6808			M9a1b1
Mebrak	M295	F	0.6	7.8	10.7	1068792	562680	209408			F1c1a1a
Mebrak	M354	M		3	2.3	914265	489284	181952	O2a2b1a1a6	Oα1c1a1b1	M9a1a1c1b1a	Parent-offspring of M4681 and M63_M339_M359
Mebrak	M368	F	6.1	6		1147914	592126	222127			M9a1a1c1b1a
Mebrak	M4580	F		1.9	1.5	745826	401547	148001			F1c1a1a
Mebrak	M4681	F		6.1	5.9	1004041	536101	198806			M9a1a1c1b1a
Mebrak	M63_M339_M359	M	1.5	3.5	4.7	1066823	561099	208493	O2a2b1a1a6	Oα1c1a1b1a	M9a1a1c1b1a
Mebrak	M240	M	0.045			50785	27148	9773	N/A	N/A	M9a1a2
Mebrak	M344	M	0.044			53581	29346	10385	N/A	N/A	Z3a1a
Mebrak	M3490	F		0.18948		186108	100098	38617			F1c1a1a
Rhirhi	R1	F		4.4	3.3	917501	495584	183098			F1g
Rhirhi	R2_R7	F	0.8	6.7	7.4	1078128	566444	210576			F1c1a1a
Rhirhi	R5	M		1.6	1.5	564333	302471	113874	O2a2b1a1	Oα1c1	F1c1a1a	brother of R2_R7
Rhirhi	R8	F		2.6	1.8	770810	417906	155096			M13a2
Samdzong	S10_S13	M	3.5	7.5	8.3	1142978	590272	221365	O2a2b1a1a6	Oα1c1a1b1a	M9a1a1c1b1a
Samdzong	S143_S173	M	1.1	9.9	21.5	1101048	576163	214648	O2a2b1a1a6	Oα1c1a1b1a	M9a1a1c1b1a
Samdzong	S153_S183	M		6.7	3.9	1012245	538083	200490	O2a2b1a1a6	Oα1c1a	D4i
Samdzong	S18_S20_S21_S22	F		13.1	6.7	1061638	560754	209173			M9a1a1c1b	mother of S10_S13
Samdzong	S29_S30	M		2		28704	15247	5896	N/A	N/A	N/A	Parent-offspring of S143_S173
Samdzong	S35	M	3.8			1100933	573523	213287	O2a2b1a1a	Oα1c1a	M9a1a
Samdzong	S36	F		1.1	1.1	23242	12333	4564			F1c1a1
Samdzong	S41	M	2.5			988828	520471	191729	D1a1a1a2	D1a1a1a2	F1d
Samdzong	S8	F	0.7	8.5	12.8	1091715	569956	213107			F1g
Samdzong	S40	F	0.09			109680	59277	21319			F1c1a1a
Samdzong	S16	F		0.06444		69668	37126	14433			N/A
Samdzong	S163	M		0.11969		124509	66622	25797	O	O	N/A
					num sites	1150639	593124	222521

## Sheet: SD3
Supplementary Data 3. Accelerator Mass Spectrometry (AMS) dates of the aMMD sites investigated in this study. We report 15 new AMS dates as well as previously published dates for each of the seven aMMD sites.
Site	Lab ID	Sample ID	Uncalibrated 14C age	Material	Calibrated age (BCE/CE)	Median age	Reference
Suila	UCIAMS 228061	HHARP-19-Suila_Ind2	3140 ± 20	human tooth	1494-1317 BCE	1420 BCE	This manuscript
Lubrak	UCIAMS 204452	HHARP-17-B!-S1	2980 ± 20	human tooth	1269-1123 BCE	1208 BCE	This manuscript
Rhirhi	UCIAMS 173189	RR3	2595 ± 15	human tooth	777-603 BCE	792 BCE	This manuscript
Rhirhi	UCIAMS 173179	RR2	2560 ± 15	human tooth	706-597 BCE	780 BCE	This manuscript
Chokhopani	Hd 15597	n/a	2575 ± 19	unknown	803-765 BCE	785 BCE	Simons, A., W. Schön and S.Shrestha 1994
Mebrak	UtC 5328	635-4	2413 ± 39	human bone	750-398 BCE	503 BCE	Simons 2020: Tab 2, pp.370-371
Mebrak	UtC 5568	633-51	2336 ± 27	human bone	479-238 BCE	400 BCE	Simons 2020: Tab 2, pp.370-372
Mebrak	UtC 5573	636-11	2270 ± 29	human bone	397-207 BCE	294 BCE	Simons 2020: Tab 2, pp.370-373
Mebrak	UtC 5570	633-77	2266 ± 28	human bone	395-207 BCE	287 BCE	Simons 2020: Tab 2, pp.370-374
Mebrak	UCIAMS 87442/PSU-4673	633-9	2245 ± 20	human tooth	387-207 BCE	279 BCE	This manuscript
Mebrak	UtC 5569	633-52	2244 ± 26	human bone	388-205 BCE	277 BCE	Simons 2020: Tab 2, pp.370-371
Mebrak	UtC 5322	631-49	2244 ± 38	human bone	394-199 BCE	280 BCE	Simons 2020: Tab 2, pp.370-372
Mebrak	UtC 5326	633-79	2222 ± 36	human bone	386-179 BCE	279 BCE	Simons 2020: Tab 2, pp.370-373
Mebrak	UtC 5572	633-91	2205 ± 28	human bone	370-176 BCE	282 BCE	Simons 2020: Tab 2, pp.370-374
Mebrak	UCIAMS 87443/PSU-4674	633-79	2205 ± 20	human tooth	363-179 BCE	285 BCE	This manuscript
Mebrak	UtC 5194	634-58	2199 ± 33	human bone	374-171 BCE	280 BCE	Simons 2020: Tab 2, pp.370-371
Mebrak	UtC 5327	634-15	2134 ± 40	human bone	356-46 BCE	158 BCE	Simons 2020: Tab 2, pp.370-372
Mebrak	UtC 5323	633-33	2114 ± 33	human bone	342-45 BCE	129 BCE	Simons 2020: Tab 2, pp.370-373
Mebrak	UtC 5324	633-25	2100 ± 33	human bone	339 BCE-10 CE	114 BCE	Simons 2020: Tab 2, pp.370-374
Mebrak	UtC 5195	634-25	2062 ± 31	human bone	147 BCE-15 CE	72 BCE	Simons 2020: Tab 2, pp.370-375
Kyang	UCIAMS 1731176	S23/C1-2	2485 ± 15	human tooth	762-542 BCE	636 BCE	Eng and Aldenderfer 2020
Kyang	UCIAMS 173178	Entrance	2290 ± 15	human tooth	399-234 BCE	385 BCE	Eng and Aldenderfer 2020
Kyang	UCIAMS 173137	S28/E2	2280 ± 15	uncarbonized wood	396-233 BCE	377 BCE	Eng and Aldenderfer 2020
Kyang	UCIAMS 173177	S6/E-1	2220 ± 15	human tooth	368-203 BCE	274 BCE	Eng and Aldenderfer 2020
Kyang	MAMS37096	KYA012	2213 ± 19	uncarbonized wood	320-199 BCE	280 BCE	This manuscript
Kyang	UCIAMS 129227/PSU-5663	K-1	2195 ± 15	human tooth	357-196 BCE	295 BCE	Eng and Aldenderfer 2020
Kyang	UCIAMS 173138	S20	2175 ± 15	uncarbonized wood	352-168 BCE	302 BCE	Eng and Aldenderfer 2020
Kyang	MAMS 37095	KYA011	2154 ± 19	uncarbonized wood	350-60 BCE	192 BCE	This manuscript
Samdzong	UCIAMS 129229/PSU-5665	SZ6_1	1630 ± 15	human tooth	407-534 CE	431 CE	Aldenderfer and Eng 2016
Samdzong	UCIAMS128464/PSU-5653	SZ5_2	1580 ± 20	uncarbonized wood	428-546 CE	484 CE	Aldenderfer and Eng 2016
Samdzong	UCIAMS 171150	SZ1_C1_1	1545 ± 15	human tooth	437-581 CE	545 CE	Aldenderfer and Eng 2016
Samdzong	MAMS 39279	SZG030.A	1532 ± 17	animal tooth	535-596 CE	556 CE	This manuscript
Samdzong	MAMS 30277	SZG028.A	1530 ± 17	animal tooth	480-597 CE	557 CE	This manuscript
Samdzong	MAMS 37903	SZG026	1508 ± 20	uncarbonized wood	542-604 CE	573 CE	This manuscript
Samdzong	MAMS37904	SGZ027	1502 ± 21	uncarbonized wood	544=635 CE	577 CE	This manuscript
Samdzong	UCIAMS 128463/PSU-5652	SZ5_1	1440 ± 20	uncarbonized wood	594-650 CE	621 CE	Aldenderfer and Eng 2016
Samdzong	UCIAMS 174148	SZ1_C3_1	1395 ± 15	human tooth	607-662 CE	648 CE	Aldenderfer and Eng 2016
Samdzong	UCIAMS 171149	SZ1_C4_1	1390 ± 15	human tooth	609-663 CE	650 CE	Aldenderfer and Eng 2016
Samdzong	UCIAMS 87444/PSU-4675	SZ1_C2_1	1380 ± 25	human tooth	605-674 CE	652 CE	Aldenderfer and Eng 2016
Samdzong	UCIAMS 173181	SZ1_C1-4	1365 ± 15	human tooth	647-669 CE	656 CE	Aldenderfer and Eng 2016
Samdzong	UCIAMS 87445/PSU-4676	SZ1_C1_2	1360 ± 25	human tooth	611-772 CE	659 CE	Aldenderfer and Eng 2016
Samdzong	MAMS 39278	SZG029.A	1341 ± 17	animal tooth	651-772 CE	665 CE	This manuscript
Samdzong	MAMS 39281	SZG032.A	1304 ± 17	animal tooth	662-773 CE	735 CE	This manuscript
Samdzong	MAMS 39280	SZG031.A	1281 ± 17	animal tooth	673-774 CE	723 CE	This manuscript
Samdzong	UCIAMS 129230/PSU-5666	SZ7_1	1165 ± 15	human tooth	775-952 CE	870 CE	Aldenderfer and Eng 2016

## Sheet: SD4
Supplementary Data 4. Library duplicates and relatedness analysis. (A) We report PMR between duplicate pairs of libraries (B) We re-calculate PMR per individual, and identify 8 first-degree and 5 second-degree relatives. We report these PMR and IBD coefficients from the lcMLkin v0.5.0 program, which distinguished the first-degree relatives into five parent-offspring pairs and three full siblings.
(A) Library duplicates									(B) Individual relatives
Individual.ID	Sample.ID1	Pandora.ID1	Sample.ID2	Pandora.ID2	nSNPs	nmismatch	pmismatch		ID1	ID2	nSNPs	nmismatch	pmismatch	k0_hat	k1_hat	k2_hat	pi_HAT	nbSNP	Relationship
KS20_KS25	KS20	KYA002.A0101	KS20	KYA002.A0102	517111	61590	0.1191		KM4	KS8	1038956	186850	0.17984	0.367	0.402	0.231	0.432	136962	Full sibling
	KS20	KYA002.A0101	KS25	KYA005.A0101	948729	113381	0.11951		M354	M4681	831398	151348	0.18204	0.17	0.827	0.002	0.416	121239	Parent-Offspring
	KS20	KYA002.A0101	KS25	KYA005.A0102	630918	74758	0.11849		M354	M63_M339_M359	849473	154153	0.18147	0.184	0.808	0.008	0.412	123248	Parent-Offspring
	KS20	KYA002.A0102	KS25	KYA005.A0101	497821	58958	0.11843		M4681	M63_M339_M359	941584	199975	0.21238	0.788	0.197	0.015	0.113	131341	2nd degree
	KS20	KYA002.A0102	KS25	KYA005.A0102	343543	40120	0.11678		R5	R2_R7	517477	90721	0.17531	0.31	0.472	0.218	0.454	83250	Full sibling
	KS25	KYA005.A0101	KS25	KYA005.A0102	607307	71716	0.11809		R5	R8	404653	86025	0.21259	0.734	0.236	0.03	0.148	70359	2nd degree
KS21_KS23_KS4	KS21	KYA003.A0101	KS21	KYA003.A0102	555408	65892	0.11864		R8	R2_R7	732388	150232	0.20513	0.608	0.377	0.015	0.203	109578	2nd degree
	KS21	KYA003.A0101	KS23	KYA004.A0101	728961	89491	0.12277		S10_S13	S16	69452	13683	0.19701	0.638	0.284	0.078	0.22	12322	2nd degree
	KS21	KYA003.A0101	KS23	KYA004.A0102	573339	68734	0.11988		S10_S13	S18_S20_S21_S22	1047980	192224	0.18342	0.012	0.987	0.001	0.495	138696	Parent-Offspring
	KS21	KYA003.A0101	KS4	KYA010.A0101	752314	91010	0.12097		S18_S20_S21_S22	S16	69029	10559	0.15296	0.017	0.682	0.301	0.642	12288	Full sibling
	KS21	KYA003.A0102	KS23	KYA004.A0101	428935	51334	0.11968		S29_S30	S143_S173	24579	4396	0.17885	0.278	0.702	0.021	0.371	4935	Parent-Offspring
	KS21	KYA003.A0102	KS23	KYA004.A0102	351339	41506	0.11814		S36	S40	2088	417	0.19971						2nd degree
	KS21	KYA003.A0102	KS4	KYA010.A0101	435459	52272	0.12004		U1	U2	221085	40869	0.18486						Parent-Offspring
	KS23	KYA004.A0101	KS23	KYA004.A0102	446479	54792	0.12272
	KS23	KYA004.A0101	KS4	KYA010.A0101	590747	73172	0.12386		red: excluded in the group-based analysis
	KS23	KYA004.A0102	KS4	KYA010.A0101	453269	54667	0.12061
KS25	KS25	KYA005.A0101	KS25	KYA005.A0102	607307	71716	0.11809
KS8	KS8	KYA008.A0101	KS8	KYA008.A0102	394251	47323	0.12003
M63_M339_M359	M63	M63	M339	MEB005.A0101	537851	66998	0.12457
	M63	M63	M359	MEB008.A0101	478647	59252	0.12379
	M339	MEB005.A0101	M359	MEB008.A0101	570656	71515	0.12532
M295	M295	MEB002.A0101	M295	MEB002.A0102	461755	55763	0.12076
R2_R7	R2	RHI001.A0101	R2	RHI001.A0102	291105	33734	0.11588
	R2	RHI001.A0101	R7	RHI004.A0101	597574	73457	0.12293
	R2	RHI001.A0102	R7	RHI004.A0101	197013	23600	0.11979
S10_S13	S10	S10	S13	SZG002.A0101	971049	120459	0.12405
S8	S8	SZG001.A0101	S8	SZG001.A0102	517460	64963	0.12554
S143_S173	S143	SZG003.A0101	S143	SZG003.A0102	668765	77343	0.11565
	S143	SZG003.A0101	S173	SZG008.A0101	7788	984	0.12635
	S143	SZG003.A0102	S173	SZG008.A0101	5435	666	0.12254
S153_S183	S153	SZG005.A0101	S183	SZG010.A0101	666462	83621	0.12547
S18_S20_S21_S22	S18	SZG009.A0101	S20	SZG011.A0101	637046	80081	0.12571
	S18	SZG009.A0101	S21	SZG012.A0101	792096	98930	0.1249
	S18	SZG009.A0101	S22	SZG013.A0101	164520	20526	0.12476
	S20	SZG011.A0101	S21	SZG012.A0101	714196	89703	0.1256
	S20	SZG011.A0101	S22	SZG013.A0101	154798	19217	0.12414
	S21	SZG012.A0101	S22	SZG013.A0101	176179	22020	0.12499
S29_S30	S29	SZG014.A0101	S30	SZG015.A0101	357	41	0.11485

## Sheet: SD5
Supplementary Data 5. Populations and individuals in the HumanOrigins dataset.
Type	Population	N	Source	PCA.Eurasia	PCA.EastAsia	F-statistics	qpAdm	qpGraph	Individual.IDs.ancients
Present-day	Abazin	10	Jeong et al 2019	v
Present-day	Abkhasian	9	Lazaridis et al 2016	v
Present-day	Adygei	31	Lazaridis et al 2016; Jeong et al 2019	v
Present-day	Albanian	6	Lazaridis et al 2016	v
Present-day	Aleut	7	Lazaridis et al 2016	v
Present-day	Aleut_Tlingit	4	Lazaridis et al 2016	v
Present-day	Altaian	24	Lazaridis et al 2016; Jeong et al 2019	v
Present-day	Altaian_Chelkans	8	Jeong et al 2019	v
Present-day	Ami	10	Lazaridis et al 2016	v	v	v	v	v
Present-day	Armenian	10	Lazaridis et al 2016	v
Present-day	Armenian_Hemsheni	8	Jeong et al 2019	v
Present-day	Atayal	9	Lazaridis et al 2016	v	v	v
Present-day	Avar	10	Jeong et al 2019	v
Present-day	Azeri	17	Jeong et al 2019	v
Present-day	Balkar	10	Lazaridis et al 2016	v
Present-day	Bashkir	53	Jeong et al 2019	v
Present-day	Basque	29	Lazaridis et al 2016	v
Present-day	Belarusian	10	Lazaridis et al 2016	v
Present-day	Besermyan	6	Jeong et al 2019	v
Present-day	Borneo	9	Lazaridis et al 2016	v	v	v
Present-day	Bulgarian	10	Lazaridis et al 2016	v
Present-day	Buryat	37	Jeong et al 2019	v
Present-day	Cambodian	8	Lazaridis et al 2016	v	v	v
Present-day	Chakehshanega	3	Nakatsuka et al 2017		v		v
Present-day	Chechen	9	Lazaridis et al 2016	v
Present-day	Chukchi	20	Lazaridis et al 2016	v
Present-day	Chuvash	16	Lazaridis et al 2016; Jeong et al 2019	v
Present-day	Circassian	9	Jeong et al 2019	v
Present-day	Croatian	10	Lazaridis et al 2016	v
Present-day	Cypriot	8	Lazaridis et al 2016	v
Present-day	Czech	10	Lazaridis et al 2016	v
Present-day	Dai	10	Lazaridis et al 2016	v	v	v
Present-day	Darginian	8	Jeong et al 2019	v
Present-day	Daur	9	Lazaridis et al 2016	v	v	v
Present-day	Dolgan	4	Lazaridis et al 2016	v
Present-day	Dungan	13	Jeong et al 2019	v	v	v
Present-day	Enets	3	Lazaridis et al 2016	v
Present-day	English	10	Lazaridis et al 2016	v
Present-day	Eskimo_ChaplinSireniki	7	Lazaridis et al 2016	v
Present-day	Eskimo_Naukan	12	Lazaridis et al 2016	v
Present-day	Estonian	10	Lazaridis et al 2016	v
Present-day	Even	9	Lazaridis et al 2016	v
Present-day	Evenk_FarEast	5	Jeong et al 2019	v
Present-day	Evenk_Transbaikal	8	Jeong et al 2019	v
Present-day	Ezid	8	Jeong et al 2019	v
Present-day	Finnish	8	Lazaridis et al 2016	v
Present-day	French	61	Lazaridis et al 2016	v
Present-day	Gagauz	9	Jeong et al 2019	v
Present-day	Georgian	23	Lazaridis et al 2016; Jeong et al 2019	v
Present-day	German	10	Lazaridis et al 2016	v
Present-day	Greek	20	Lazaridis et al 2016	v
Present-day	Gurung	5	Wang et al 2020		v	v	v
Present-day	Han	33	Lazaridis et al 2016	v	v	v
Present-day	HanNorth	10	Lazaridis et al 2016	v	v	v
Present-day	Hezhen	8	Lazaridis et al 2016	v	v	v
Present-day	Hungarian	20	Lazaridis et al 2016	v
Present-day	Icelandic	12	Lazaridis et al 2016	v
Present-day	Ingushian	10	Jeong et al 2019	v
Present-day	Irish	24	Lazaridis et al 2016	v
Present-day	Irish_Ulster	6	Lazaridis et al 2016	v
Present-day	Italian_North	20	Lazaridis et al 2016	v
Present-day	Italian_South	5	Lazaridis et al 2016	v
Present-day	Itelmen	6	Lazaridis et al 2016	v
Present-day	Japanese	29	Lazaridis et al 2016	v	v	v
Present-day	Jew_Ashkenazi	7	Lazaridis et al 2016	v
Present-day	Jew_Georgian	7	Lazaridis et al 2016	v
Present-day	Kabardinian	10	Jeong et al 2019	v
Present-day	Kaitag	8	Jeong et al 2019	v
Present-day	Kalmyk	10	Lazaridis et al 2016	v
Present-day	Karachai	12	Jeong et al 2019	v
Present-day	Karakalpak	14	Jeong et al 2019	v
Present-day	Karelian	15	Jeong et al 2019	v
Present-day	Kazakh	18	Jeong et al 2019	v
Present-day	Ket	22	Lazaridis et al 2016	v
Present-day	Khakass	16	Jeong et al 2019	v
Present-day	Khakass_Kachins	8	Jeong et al 2019	v
Present-day	Khamnegan	10	Jeong et al 2019	v
Present-day	Kinh	8	Lazaridis et al 2016	v	v	v
Present-day	Korean	6	Lazaridis et al 2016	v	v	v
Present-day	Koryak	9	Lazaridis et al 2016	v
Present-day	Kubachinian	6	Jeong et al 2019	v
Present-day	Kumyk	8	Lazaridis et al 2016	v
Present-day	Kurd	8	Jeong et al 2019	v
Present-day	Kyrgyz	9	Lazaridis et al 2016	v
Present-day	Lahu	8	Lazaridis et al 2016	v	v	v
Present-day	Lak	10	Jeong et al 2019	v
Present-day	Lezgin	9	Lazaridis et al 2016	v
Present-day	Lithuanian	10	Lazaridis et al 2016	v
Present-day	Mala	13	Lazaridis et al 2016				v
Present-day	Maltese	8	Lazaridis et al 2016	v
Present-day	Mansi	8	Lazaridis et al 2016	v
Present-day	Mbuti	10	Lazaridis et al 2016			v	v	v
Present-day	Miao	10	Lazaridis et al 2016	v	v	v
Present-day	Mixe	10	Lazaridis et al 2016				v	v
Present-day	Moldavian	10	Jeong et al 2019	v
Present-day	Mongol	34	Jeong et al 2019	v
Present-day	Mongola	6	Lazaridis et al 2016	v	v	v
Present-day	Mordovian	32	Lazaridis et al 2016; Jeong et al 2019	v
Present-day	Nagaseema	3	Nakatsuka et al 2017		v		v
Present-day	Nanai	10	Jeong et al 2019	v	v	v
Present-day	Naxi	9	Lazaridis et al 2016	v	v	v	v	v
Present-day	Negidal	3	Jeong et al 2019	v	v	v
Present-day	Nganasan	33	Lazaridis et al 2016	v
Present-day	Nivh	10	Jeong et al 2019	v	v	v
Present-day	Nogai	25	Lazaridis et al 2016; Jeong et al 2019	v
Present-day	Norwegian	11	Lazaridis et al 2016	v
Present-day	Nubri.LC	6	Jeong et al 2018			v	v
Present-day	Nyshi	4	Nakatsuka et al 2017		v	v
Present-day	Onge	11	Lazaridis et al 2016				v	v
Present-day	Orcadian	13	Lazaridis et al 2016	v
Present-day	Oroqen	9	Lazaridis et al 2016	v	v	v
Present-day	Ossetian	16	Lazaridis et al 2016; Jeong et al 2019	v
Present-day	Pathan	17	Lazaridis et al 2016				v
Present-day	Polish	23	Lazaridis et al 2016	v
Present-day	Poumainaga	2	Nakatsuka et al 2017		v		v
Present-day	Pulliyar	35	Nakatsuka et al 2017				v
Present-day	Qiang_Danba	9	Wang et al 2020		v	v	v
Present-day	Qiang_Daofu	11	Wang et al 2020		v	v	v
Present-day	Romanian	10	Lazaridis et al 2016	v
Present-day	Russian	71	Lazaridis et al 2016; Jeong et al 2019	v
Present-day	Russian_Archangelsk_Krasnoborsky	6	Jeong et al 2019	v
Present-day	Russian_Archangelsk_Leshukonsky	5	Jeong et al 2019	v
Present-day	Russian_Archangelsk_Pinezhsky	5	Jeong et al 2019	v
Present-day	Saami	3	Lazaridis et al 2016	v
Present-day	Sardinian	27	Lazaridis et al 2016	v
Present-day	Scottish	33	Lazaridis et al 2016	v
Present-day	Selkup	25	Lazaridis et al 2016	v
Present-day	Semende	10	Lazaridis et al 2016	v	v	v
Present-day	She	10	Lazaridis et al 2016	v	v	v
Present-day	Sherpa_Khumbu	10	Jeong et al 2014; Jeong et al 2018	v	v	v	v
Present-day	Sherpa_Khumbu.LC	9	Jeong et al 2018			v	v
Present-day	Sherpa_Nakatsuka	3	Nakatsuka et al 2017	v	v	v
Present-day	Sherpa_Wang	4	Wang et al 2020	v	v	v
Present-day	Shetlandic	10	Lazaridis et al 2016	v
Present-day	Shor_Khakassia	6	Jeong et al 2019	v
Present-day	Shor_Mountain	7	Jeong et al 2019	v
Present-day	Sicilian	11	Lazaridis et al 2016	v
Present-day	Sorb	9	Lazaridis et al 2016	v
Present-day	Spanish	53	Lazaridis et al 2016	v
Present-day	Spanish_North	5	Lazaridis et al 2016	v
Present-day	Tabasaran	10	Jeong et al 2019	v
Present-day	Tajik	31	Lazaridis et al 2016; Jeong et al 2019	v
Present-day	Tamang	7	Wang et al 2020		v	v	v
Present-day	Tatar_Kazan	13	Jeong et al 2019	v
Present-day	Tatar_Mishar	10	Jeong et al 2019	v
Present-day	Tatar_Siberian	19	Jeong et al 2019	v
Present-day	Tatar_Siberian_Zabolotniye	5	Jeong et al 2019	v
Present-day	Thai	10	Lazaridis et al 2016	v	v	v
Present-day	Tibetan_Chamdo	12	Wang et al 2020		v	v	v
Present-day	Tibetan_Gangcha	20	Wang et al 2020		v	v	v
Present-day	Tibetan_Gannan	5	Wang et al 2020		v	v	v
Present-day	Tibetan_Lhasa	9	Wang et al 2020		v	v	v
Present-day	Tibetan_Nagqu	8	Wang et al 2020		v	v	v
Present-day	Tibetan_Shannan	9	Wang et al 2020		v	v	v
Present-day	Tibetan_Shigatse	10	Wang et al 2020		v	v	v
Present-day	Tibetan_Xinlong	10	Wang et al 2020		v	v	v
Present-day	Tibetan_Xunhua	4	Wang et al 2020		v	v	v
Present-day	Tibetan_Yajiang	10	Wang et al 2020		v	v	v
Present-day	Tibetan_Yunnan	4	Wang et al 2020		v	v	v
Present-day	Todzin	3	Jeong et al 2019	v
Present-day	Tofalar	13	Lazaridis et al 2016	v
Present-day	Tsum.LC	10	Jeong et al 2018			v	v
Present-day	Tu	10	Lazaridis et al 2016	v	v	v
Present-day	Tubalar	27	Lazaridis et al 2016; Jeong et al 2019	v
Present-day	Tujia	10	Lazaridis et al 2016	v	v	v
Present-day	Turkish	50	Lazaridis et al 2016	v
Present-day	Turkish_Balikesir	5	Lazaridis et al 2016	v
Present-day	Turkmen	7	Lazaridis et al 2016	v
Present-day	Tuvinian	20	Lazaridis et al 2016; Jeong et al 2019	v
Present-day	Udmurt	10	Jeong et al 2019	v
Present-day	Ukrainian	21	Lazaridis et al 2016; Jeong et al 2019	v
Present-day	Ulchi	25	Lazaridis et al 2016	v	v	v
Present-day	UpperMustang	6	Jeong et al 2018	v	v	v
Present-day	UpperMustang.LC	11	Jeong et al 2018			v	v
Present-day	Uygur	10	Lazaridis et al 2016	v
Present-day	Uzbek	27	Lazaridis et al 2016; Jeong et al 2019	v
Present-day	Veps	10	Jeong et al 2019	v
Present-day	Xibo	7	Lazaridis et al 2016	v	v	v
Present-day	Yakut	20	Lazaridis et al 2016	v
Present-day	Yi	10	Lazaridis et al 2016	v	v	v	v	v
Present-day	Yukagir	19	Lazaridis et al 2016	v
Ancient	AR_EN	2	Ning et al 2020			v			WQM4,ZLNR-2
Ancient	AR_IA	1	Ning et al 2020			v			ZLNR-1
Ancient	AR_Xianbei_IA	3	Ning et al 2020			v			MGS-M6,MGS-M7L,MGS-M7R
Ancient	Bianbian_EN	1	Yang et al 2020			v			Bianbian
Ancient	Boshan_EN	1	Yang et al 2020			v			BS
Ancient	Botai	3	Damgaard et al 2018					v	BOT2016,BOT15,BOT14
Ancient	Chokhopani	3	Jeong et al 2016; This study			v	v	v	C1,CNE1,C3
Ancient	Chuanyun_historic	1	Yang et al 2020			v			L5694
Ancient	DevilsCave_N	4	Sikora et al 2019			v		v	NEO236,NEO238,NEO239,NEO240
Ancient	HMMH_MN	1	Ning et al 2020			v			HMF32
Ancient	Iran_N	8	Lazaridis et al 2016; Narasimhan et al 2019				v		I1290,I1944,I1945,I1947,I1949,I1954,I1951,I7527
Ancient	Kyang	7 (6)	This study			v	v	v	KM4,KS20_KS25,KS21_KS23_KS4,KS26,KS5,KS9,KS8
Ancient	Liangdao1_EN	1	Yang et al 2020			v			LD1
Ancient	Liangdao2_EN	1	Yang et al 2020			v			LD2
Ancient	Loschbour	1	Lazaridis et al 2014					v	Loschbour_published.DG
Ancient	Lubrak	2	This study			v	v	v	L1,L2
Ancient	MA-1	1	Raghavan et al 2014					v	MA1.SG
Ancient	McColl_SEA_GR1	2	McColl et al 2018			v		v	La368,Ma911
Ancient	McColl_SEA_GR2	6	McColl et al 2018			v			La364,La727,La898,Ma912,Vt833,Vt880
Ancient	McColl_SEA_GR3	5	McColl et al 2018			v			Vt777,Vt779,Vt781,Vt796,Vt808
Ancient	McColl_SEA_GR31	2	McColl et al 2018			v			Th531,Vt719
Ancient	McColl_SEA_GR4	4	McColl et al 2018			v			Th519,Th521,Th530,Th703
Ancient	McColl_SEA_GR41	1	McColl et al 2018			v			Vt778
Ancient	McColl_SEA_GR5	2	McColl et al 2018			v			In661,In662
Ancient	McColl_SEA_GR6	3	McColl et al 2018			v			Ma554,Ma555,Phl534
Ancient	Mebrak	9 (8)	Jeong et al 2016; This study			v	v	v	M2113,M241,M295,M368,M4580,M4681,M63_M339_M359,M344,M354
Ancient	Miaozigou_MN	3	Ning et al 2020			v			MZGM10-1,MZGM16,MZGM25-2
Ancient	Qihe_EN	1	Yang et al 2020			v			Qihe2_d
Ancient	Rhirhi	4 (3)	This study			v	v	v	R1,R2_R7,R8,R5
Ancient	Samdzong	12 (10)	Jeong et al 2016; This study			v	v	v	S10_S13,S143_S173,S153_S183,S35,S36,S41,S8,S40,S16,S163,S18_S20_S21_S22,S29_S30
Ancient	Shimao_LN	3	Ning et al 2020			v			SM-SGDLM27,SM-SGDLM6,SM-SGDLM7X
Ancient	Suogang_LN	2	Yang et al 2020			v			SuogangB1_d,SuogangB3_d
Ancient	Suila	2 (1)	This study			v	v	v	U1,U2
Ancient	Tanshishan_LN	4	Yang et al 2020			v			L5696_d,L5698_d,L7417_d,L7415
Ancient	Tianyuan	1	Yang et al 2017					v	Tianyuan
Ancient	Upper_YR_IA	4	Ning et al 2020			v			DCZM17IV,DCZ-M21II,DCZ-M22IV,DCZ-M6
Ancient	Upper_YR_LN	7	Ning et al 2020			v	v	v	JCKM1-1,LJM14,LJM25,LJM2,LJM3,LJM4,LJM5
Ancient	Ust'-Ishim	1	Fu et al 2016					v	Ust_Ishim_published.DG
Ancient	Villabruna	1	Posth et al 2016				v		Villabruna
Ancient	West_Siberian_HG	3	Narasimhan et al 2019					v	I1958,I1960,I5766
Ancient	WLR_BA	2	Ning et al 2020			v			91KLH11,91KLH18
Ancient	WLR_BA_o	1	Ning et al 2020			v			91KLM2
Ancient	WLR_LN	3	Ning et al 2020			v			EDM124,EDM139,EDM176
Ancient	WLR_MN	3	Ning et al 2020			v			BLSM27S,BLSM41,BLSM45
Ancient	Xiaogao_EN	1	Yang et al 2020			v			Xiaogao
Ancient	Xiaojingshan_EN	3	Yang et al 2020			v			XJS1309_M7,XJS1311_M16,XJS1309_M4
Ancient	Xitoucun_LN	7	Yang et al 2020			v			L5692_d,L5706_d,L5701_d,L5703_d,L5704_d,L5700,L5705
Ancient	YR_LBIA	6	Ning et al 2020			v			HJTM115,HJTW13,JXNTM23,JXNTM2,LGM41,LGM79
Ancient	YR_LN	8	Ning et al 2020			v			HJTM107,HJTM109,PLTM310,PLTM311,PLTM312,PLTM313,WD-WT1H16,WD-WT5M2
Ancient	YR_MN	8	Ning et al 2020			v	v	v	WGH35-1,WGM20,WGM35,WGM43,WGM70,WGM76S,WGM94,XW-M1R18
Ancient	Yumin_EN	1	Yang et al 2020			v			Yumin

## Sheet: SD6
Supplementary Data 6. Present-day populations in the Illumina dataset.
Type	Population	N	Source	Altitude
present-day	Brokkat	16	Arciero et al 2018	3750
present-day	Brokpa	14	Arciero et al 2018	1608
present-day	Bumthang	19	Arciero et al 2018	3250
present-day	Chali	19	Arciero et al 2018	3201
present-day	Dakpa	2	Arciero et al 2018	2169
present-day	Dzala	14	Arciero et al 2018	2705
present-day	Gongduk	17	Arciero et al 2018	1437
present-day	Khengpa	18	Arciero et al 2018	808
present-day	Kurtop	19	Arciero et al 2018	3850
present-day	Lakha	18	Arciero et al 2018	2985
present-day	Layap	12	Arciero et al 2018	4115
present-day	Mangde	18	Arciero et al 2018	2980
present-day	Monpa	20	Arciero et al 2018	2027
present-day	Ngalop	18	Arciero et al 2018	2880
present-day	Nup	18	Arciero et al 2018	2385
present-day	Tshangla	19	Arciero et al 2018	2240
present-day	Bodo	18	Arciero et al 2018	99
present-day	Toto	46	Arciero et al 2018	86
present-day	Bahing	1	Arciero et al 2018	1561
present-day	Bantawa	2	Arciero et al 2018	1500
present-day	Baram	20	Arciero et al 2018	1080
present-day	Chamling	7	Arciero et al 2018	1550
present-day	Chantyal	20	Arciero et al 2018	1932
present-day	Chepang	18	Arciero et al 2018	241
present-day	Chetri	19	Arciero et al 2018	987
present-day	Damai	8	Arciero et al 2018	987
present-day	Dhimal	20	Arciero et al 2018	86
present-day	Dumi	2	Arciero et al 2018	1650
present-day	Gurung	17	Arciero et al 2018	2182
present-day	Kulung	2	Arciero et al 2018	1400
present-day	Limbu	19	Arciero et al 2018	1094
present-day	Magar	17	Arciero et al 2018	844
present-day	Majhi	17	Arciero et al 2018	969
present-day	Nachiring	1	Arciero et al 2018	2350
present-day	Newar	17	Arciero et al 2018	1665
present-day	Puma	1	Arciero et al 2018	1400
present-day	Sampang	3	Arciero et al 2018	1300
present-day	Sarki	6	Arciero et al 2018	987
present-day	Sherpa	10	Arciero et al 2018	4550
present-day	Sonar	2	Arciero et al 2018	987
present-day	Sunwar	4	Arciero et al 2018	1750
present-day	Tamang	19	Arciero et al 2018	1900
present-day	Thakali	16	Arciero et al 2018	3035
present-day	Wambule	13	Arciero et al 2018	1350
present-day	Lhasa	36	Arciero et al 2018	3700
present-day	Nagqu	31	Arciero et al 2018	4500
present-day	Nyingchi	20	Arciero et al 2018	2900
present-day	Shannan	26	Arciero et al 2018	3600
present-day	Tingri	19	Arciero et al 2018	4500
present-day	Sherpa_Khumbu	49	Jeong et al 2014	3800
present-day	UpperMustang	200	Jeong et al 2018	3747
present-day	LowerMustang	50	Jeong et al 2018	3493
present-day	Tsum	51	Jeong et al 2018	3437
present-day	Nubri	43	Jeong et al 2018	3421
present-day	BiakaPygmy	21	Li et al 2008 (HGDP)	N/A
present-day	MbutiPygmy	13	Li et al 2008 (HGDP)	N/A
present-day	Mandenka	22	Li et al 2008 (HGDP)	N/A
present-day	Yoruba	21	Li et al 2008 (HGDP)	N/A
present-day	BantuKenya	11	Li et al 2008 (HGDP)	N/A
present-day	San	5	Li et al 2008 (HGDP)	N/A
present-day	BantuSouthAfrica	8	Li et al 2008 (HGDP)	N/A
present-day	BantuSouthAfrica	8	Li et al 2008 (HGDP)	N/A
present-day	Mozabite	29	Li et al 2008 (HGDP)	N/A
present-day	Bedouin	46	Li et al 2008 (HGDP)	N/A
present-day	Druze	42	Li et al 2008 (HGDP)	N/A
present-day	Palestinian	46	Li et al 2008 (HGDP)	N/A
present-day	Brahui	25	Li et al 2008 (HGDP)	N/A
present-day	Balochi	24	Li et al 2008 (HGDP)	N/A
present-day	Hazara	22	Li et al 2008 (HGDP)	N/A
present-day	Makrani	25	Li et al 2008 (HGDP)	N/A
present-day	Sindhi	24	Li et al 2008 (HGDP)	N/A
present-day	Pathan	22	Li et al 2008 (HGDP)	N/A
present-day	Kalash	23	Li et al 2008 (HGDP)	N/A
present-day	Burusho	25	Li et al 2008 (HGDP)	N/A
present-day	Han	34	Li et al 2008 (HGDP)	N/A
present-day	Han-NChina	10	Li et al 2008 (HGDP)	N/A
present-day	Tujia	10	Li et al 2008 (HGDP)	N/A
present-day	Yi	10	Li et al 2008 (HGDP)	N/A
present-day	Miao	10	Li et al 2008 (HGDP)	N/A
present-day	Daur	9	Li et al 2008 (HGDP)	N/A
present-day	Mongola	10	Li et al 2008 (HGDP)	N/A
present-day	Hezhen	8	Li et al 2008 (HGDP)	N/A
present-day	Xibo	9	Li et al 2008 (HGDP)	N/A
present-day	Uygur	10	Li et al 2008 (HGDP)	N/A
present-day	Oroqen	9	Li et al 2008 (HGDP)	N/A
present-day	Dai	10	Li et al 2008 (HGDP)	N/A
present-day	Lahu	8	Li et al 2008 (HGDP)	N/A
present-day	She	10	Li et al 2008 (HGDP)	N/A
present-day	Tu	10	Li et al 2008 (HGDP)	N/A
present-day	Yakut	25	Li et al 2008 (HGDP)	N/A
present-day	Japanese	28	Li et al 2008 (HGDP)	N/A
present-day	Cambodian	10	Li et al 2008 (HGDP)	N/A
present-day	Papuan	17	Li et al 2008 (HGDP)	N/A
present-day	Melanesian	10	Li et al 2008 (HGDP)	N/A
present-day	French	28	Li et al 2008 (HGDP)	N/A
present-day	Basque	24	Li et al 2008 (HGDP)	N/A
present-day	Sardinian	28	Li et al 2008 (HGDP)	N/A
present-day	Italian	12	Li et al 2008 (HGDP)	N/A
present-day	Orcadian	15	Li et al 2008 (HGDP)	N/A
present-day	Naxi	8	Li et al 2008 (HGDP)	N/A
present-day	Tuscan	8	Li et al 2008 (HGDP)	N/A
present-day	Adygei	17	Li et al 2008 (HGDP)	N/A
present-day	Russian	25	Li et al 2008 (HGDP)	N/A
present-day	Pima	14	Li et al 2008 (HGDP)	N/A
present-day	Maya	21	Li et al 2008 (HGDP)	N/A
present-day	Colombian	7	Li et al 2008 (HGDP)	N/A
present-day	Karitiana	14	Li et al 2008 (HGDP)	N/A
present-day	Surui	8	Li et al 2008 (HGDP)	N/A
present-day	Brahmins_from_Tamil_Nadu	2	Metspalu et al 2011	N/A
present-day	Chenchus	4	Metspalu et al 2011	N/A
present-day	Gond	4	Metspalu et al 2011	N/A
present-day	Hakkipikki	4	Metspalu et al 2011	N/A
present-day	Kurumba	4	Metspalu et al 2011	N/A
present-day	Naga	4	Metspalu et al 2011	N/A
present-day	Nihali	2	Metspalu et al 2011	N/A
present-day	Tamil_Nadu_Scheduled_Caste	2	Metspalu et al 2011	N/A
present-day	Piramalai_Kallars	8	Metspalu et al 2011	N/A
present-day	Pulliyar	5	Metspalu et al 2011	N/A
present-day	Velamas	10	Metspalu et al 2011	N/A
present-day	Bengali	1	Metspalu et al 2011	N/A
present-day	Bhunjia	1	Metspalu et al 2011	N/A
present-day	Brahmins_from_Uttar_Pradesh	7	Metspalu et al 2011	N/A
present-day	Brahmins_from_Uttaranchal	1	Metspalu et al 2011	N/A
present-day	Chamar	10	Metspalu et al 2011	N/A
present-day	Dharkars	12	Metspalu et al 2011	N/A
present-day	Dhurwa	1	Metspalu et al 2011	N/A
present-day	Dusadh	10	Metspalu et al 2011	N/A
present-day	Kanjars	9	Metspalu et al 2011	N/A
present-day	Kol	16	Metspalu et al 2011	N/A
present-day	Kshatriya	7	Metspalu et al 2011	N/A
present-day	Kurmi	1	Metspalu et al 2011	N/A
present-day	Lambadi	1	Metspalu et al 2011	N/A
present-day	Mawasi	1	Metspalu et al 2011	N/A
present-day	Meena	1	Metspalu et al 2011	N/A
present-day	Meghawal	1	Metspalu et al 2011	N/A
present-day	Muslim	5	Metspalu et al 2011	N/A
present-day	Tharus	3	Metspalu et al 2011	N/A
present-day	Uttar_Pradesh_Scheduled_Caste	5	Metspalu et al 2011	N/A
present-day	Lhasa.Wang	30	Wang et al 2011	3700
present-day	Yunnan	35	Beall et al 2010	3200-3500

## Sheet: SD7
Supplementary Data 7. Genetic differences between Lubrak and Chokhopani. We calculate f4(Mbuti, East Asian; Chokhopani, Lubrak) to test whether an ancient or a present-day East Asian group are genetically closer to one than the other. Standard error measures (SEM) are calculated by 5 cM block jackknifing as implemented in the qpDstat program. Z scores are calculated by dividing f4 statistic by SE…
Pop1	Pop2	Pop3	Pop4	F4	Z	nBABA	nABBA	nSNPs
Mbuti	Ami	Chokhopani	Lubrak	0.000359	1.003	16566	16448	327415
Mbuti	AR_EN	Chokhopani	Lubrak	0.000231	0.337	5909	5881	117835
Mbuti	AR_IA	Chokhopani	Lubrak	-0.000625	-0.384	949	961	19207
Mbuti	AR_Xianbei_IA	Chokhopani	Lubrak	0.001202	1.731	5559	5427	109478
Mbuti	Atayal	Chokhopani	Lubrak	0.00012	0.324	16510	16471	327415
Mbuti	Bianbian	Chokhopani	Lubrak	0.000647	1.124	12957	12791	256606
Mbuti	Borneo	Chokhopani	Lubrak	0.000274	0.815	16474	16384	327415
Mbuti	Boshan	Chokhopani	Lubrak	0.001085	2.058	15958	15617	314145
Mbuti	Cambodian	Chokhopani	Lubrak	-0.000208	-0.622	16331	16400	327415
Mbuti	Chuanyun	Chokhopani	Lubrak	0.001353	2.043	6560	6386	128622
Mbuti	Dai	Chokhopani	Lubrak	0.000193	0.561	16529	16466	327415
Mbuti	Daur	Chokhopani	Lubrak	0.000702	2.082	16607	16377	327415
Mbuti	DevilsCave_N	Chokhopani	Lubrak	0.000949	2.085	16733	16423	327175
Mbuti	Dungan	Chokhopani	Lubrak	0.000433	1.312	16485	16344	325947
Mbuti	Gurung	Chokhopani	Lubrak	0.000489	1.385	16547	16387	326785
Mbuti	Han	Chokhopani	Lubrak	0.000394	1.205	16607	16478	327415
Mbuti	HanNorth	Chokhopani	Lubrak	0.000175	0.53	16545	16488	327415
Mbuti	Hezhen	Chokhopani	Lubrak	0.000505	1.496	16605	16440	327415
Mbuti	HMMH_MN	Chokhopani	Lubrak	0.00071	1.196	10095	9953	200134
Mbuti	Japanese	Chokhopani	Lubrak	0.000497	1.513	16602	16439	327415
Mbuti	Kinh	Chokhopani	Lubrak	0.000256	0.759	16521	16437	327415
Mbuti	Korean	Chokhopani	Lubrak	0.000427	1.202	16627	16487	327414
Mbuti	Kyang	Chokhopani	Lubrak	0.002371	6.208	17060	16283	327415
Mbuti	Lahu	Chokhopani	Lubrak	0.000282	0.812	16559	16467	327415
Mbuti	Liangdao1	Chokhopani	Lubrak	-0.000155	-0.254	8268	8295	168353
Mbuti	Liangdao2	Chokhopani	Lubrak	0.000568	1.063	14953	14785	297117
Mbuti	McColl_SEA_GR1	Chokhopani	Lubrak	-3.1e-05	-0.048	5247	5250	110729
Mbuti	McColl_SEA_GR2	Chokhopani	Lubrak	2e-05	0.047	15199	15193	306631
Mbuti	McColl_SEA_GR3	Chokhopani	Lubrak	0.000838	1.294	4837	4749	104404
Mbuti	McColl_SEA_GR31	Chokhopani	Lubrak	0.000853	0.968	3776	3712	74418
Mbuti	McColl_SEA_GR4	Chokhopani	Lubrak	-0.000365	-0.645	7875	7935	162549
Mbuti	McColl_SEA_GR41	Chokhopani	Lubrak	0.000269	0.239	1885	1874	38613
Mbuti	McColl_SEA_GR5	Chokhopani	Lubrak	0.002046	1.72	1717	1646	34543
Mbuti	McColl_SEA_GR6	Chokhopani	Lubrak	0.000945	1.502	7128	6993	143001
Mbuti	Mebrak	Chokhopani	Lubrak	0.002426	6.227	17122	16327	327415
Mbuti	Miao	Chokhopani	Lubrak	0.000557	1.599	16634	16451	327415
Mbuti	Miaozigou_MN	Chokhopani	Lubrak	0.001505	2.094	5354	5196	105205
Mbuti	Mongola	Chokhopani	Lubrak	0.00054	1.608	16591	16415	327415
Mbuti	Naga	Chokhopani	Lubrak	0.000529	1.557	16654	16480	327415
Mbuti	Nanai	Chokhopani	Lubrak	0.000758	2.26	16628	16381	325947
Mbuti	Naxi	Chokhopani	Lubrak	0.000617	1.882	16640	16438	327415
Mbuti	Negidal	Chokhopani	Lubrak	0.000423	1.112	16574	16436	325947
Mbuti	Nivh	Chokhopani	Lubrak	0.000776	2.211	16592	16339	325947
Mbuti	Nubri.LC	Chokhopani	Lubrak	0.000996	2.719	16713	16387	327415
Mbuti	Nyshi	Chokhopani	Lubrak	0.000256	0.692	16599	16515	327415
Mbuti	Oroqen	Chokhopani	Lubrak	0.000607	1.795	16622	16423	327415
Mbuti	Qiang_Danba	Chokhopani	Lubrak	0.000524	1.54	16640	16469	326785
Mbuti	Qiang_Daofu	Chokhopani	Lubrak	0.000798	2.358	16691	16430	326785
Mbuti	Qihe	Chokhopani	Lubrak	0.000212	0.315	6786	6757	137844
Mbuti	Rhirhi	Chokhopani	Lubrak	0.002558	5.526	17080	16248	325030
Mbuti	Samdzong	Chokhopani	Lubrak	0.00181	4.946	16994	16401	327415
Mbuti	Semende	Chokhopani	Lubrak	0.000435	1.219	16507	16365	327415
Mbuti	She	Chokhopani	Lubrak	0.000701	2.01	16666	16437	327415
Mbuti	Sherpa_Khumbu	Chokhopani	Lubrak	0.001352	3.906	16810	16367	327415
Mbuti	Sherpa_Khumbu.LC	Chokhopani	Lubrak	0.001386	3.899	16786	16332	327415
Mbuti	Sherpa_Nakatsuka	Chokhopani	Lubrak	0.000762	2.017	16585	16336	327415
Mbuti	Sherpa_Wang	Chokhopani	Lubrak	0.000855	2.403	16693	16414	326785
Mbuti	Shimao_LN	Chokhopani	Lubrak	7.5e-05	0.169	16449	16425	325387
Mbuti	Suila	Chokhopani	Lubrak	0.002856	4.494	11598	12269	234651
Mbuti	Suogang	Chokhopani	Lubrak	0.001501	1.238	1711	1659	34413
Mbuti	Tamang	Chokhopani	Lubrak	0.000516	1.556	16495	16327	326785
Mbuti	Tanshishan	Chokhopani	Lubrak	0.000605	1.044	8024	7926	161070
Mbuti	Thai	Chokhopani	Lubrak	0.000136	0.412	16387	16343	327415
Mbuti	Tibetan_Chamdo	Chokhopani	Lubrak	0.000885	2.623	16686	16397	326785
Mbuti	Tibetan_Gangcha	Chokhopani	Lubrak	0.000666	2.124	16611	16393	326785
Mbuti	Tibetan_Gannan	Chokhopani	Lubrak	0.000297	0.867	16494	16397	326785
Mbuti	Tibetan_Lhasa	Chokhopani	Lubrak	0.001481	4.354	16815	16331	326785
Mbuti	Tibetan_Nagqu	Chokhopani	Lubrak	0.00109	3.19	16733	16377	326785
Mbuti	Tibetan_Shannan	Chokhopani	Lubrak	0.001411	4.123	16805	16344	326785
Mbuti	Tibetan_Shigatse	Chokhopani	Lubrak	0.001382	4.255	16785	16333	326785
Mbuti	Tibetan_Xinlong	Chokhopani	Lubrak	0.000784	2.329	16665	16409	326785
Mbuti	Tibetan_Xunhua	Chokhopani	Lubrak	0.000948	2.673	16682	16373	326785
Mbuti	Tibetan_Yajiang	Chokhopani	Lubrak	0.000917	2.757	16696	16396	326785
Mbuti	Tibetan_Yunnan	Chokhopani	Lubrak	0.0009	2.477	16710	16416	326785
Mbuti	Tsum.LC	Chokhopani	Lubrak	0.001411	3.974	16816	16354	327415
Mbuti	Tu	Chokhopani	Lubrak	0.000478	1.457	16571	16414	327415
Mbuti	Tujia	Chokhopani	Lubrak	0.000389	1.146	16609	16482	327415
Mbuti	Ulchi	Chokhopani	Lubrak	0.000498	1.504	16573	16410	327415
Mbuti	UpperMustang	Chokhopani	Lubrak	0.001102	3.153	16750	16389	327415
Mbuti	UpperMustang.LC	Chokhopani	Lubrak	0.00118	3.533	16749	16363	327415
Mbuti	Upper_YR_IA	Chokhopani	Lubrak	0.000643	1.476	16253	16048	319608
Mbuti	Upper_YR_LN	Chokhopani	Lubrak	0.00033	0.85	16606	16498	326201
Mbuti	WLR_BA	Chokhopani	Lubrak	0.001541	2.691	9934	9635	194057
Mbuti	WLR_BA_o	Chokhopani	Lubrak	-0.00023	-0.395	11959	12014	237870
Mbuti	WLR_LN	Chokhopani	Lubrak	0.000994	2.113	14829	14539	291358
Mbuti	WLR_MN	Chokhopani	Lubrak	0.001608	3.595	16762	16237	326246
Mbuti	Xiaogao	Chokhopani	Lubrak	0.000676	1.244	15493	15287	303572
Mbuti	Xiaojingshan	Chokhopani	Lubrak	0.001255	2.466	11110	10834	219646
Mbuti	Xibo	Chokhopani	Lubrak	0.000625	1.806	16578	16374	327415
Mbuti	Xitoucun	Chokhopani	Lubrak	0.000785	1.51	10738	10570	214440
Mbuti	Yi	Chokhopani	Lubrak	0.000319	0.96	16614	16509	327415
Mbuti	YR_LBIA	Chokhopani	Lubrak	0.000657	1.763	16597	16383	326732
Mbuti	YR_LN	Chokhopani	Lubrak	0.000653	1.825	16682	16468	327398
Mbuti	YR_MN	Chokhopani	Lubrak	0.000414	0.989	16592	16456	326615
Mbuti	Yumin	Chokhopani	Lubrak	0.001561	2.744	15078	14616	296121

## Sheet: SD8
Supplementary Data 8. Genetic differences between aMMD groups and present-day Nepalese Tibetans. We tested if any ancient or present-day lowland East Asian groups are closer to aMMD than to present-day Sherpa/Tibetans using f4(Mbuti, East Asian; Chokhopani/Lubrak, present-day Nepalese Sherpa/Tibetan). SEMs are calculated by 5 cM block jackknifing as implemented in the qpDstat program. Z scores ar…
Pop1	Pop2	Pop3	Pop4	F4	Z	nBABA	nABBA	nSNPs
Mbuti	Ami	Lubrak	Sherpa_Khumbu	-0.000303	-0.995	16541	16640	327444
Mbuti	AR_EN	Lubrak	Sherpa_Khumbu	-0.000335	-0.578	5896	5936	117846
Mbuti	AR_IA	Lubrak	Sherpa_Khumbu	0.000242	0.173	966	961	19209
Mbuti	AR_Xianbei_IA	Lubrak	Sherpa_Khumbu	-0.000994	-1.735	5488	5597	109485
Mbuti	Atayal	Lubrak	Sherpa_Khumbu	-0.000223	-0.696	16526	16598	327444
Mbuti	Bianbian	Lubrak	Sherpa_Khumbu	-0.00045	-0.925	12889	13004	256626
Mbuti	Borneo	Lubrak	Sherpa_Khumbu	-0.000333	-1.143	16446	16555	327444
Mbuti	Boshan	Lubrak	Sherpa_Khumbu	-0.001079	-2.357	15714	16053	314172
Mbuti	Cambodian	Lubrak	Sherpa_Khumbu	0.000154	0.538	16473	16423	327444
Mbuti	Chokhopani	Lubrak	Sherpa_Khumbu	-0.002297	-5.813	16367	17119	327415
Mbuti	Chuanyun	Lubrak	Sherpa_Khumbu	-0.00127	-2.194	6407	6571	128627
Mbuti	Dai	Lubrak	Sherpa_Khumbu	-0.000118	-0.401	16559	16597	327444
Mbuti	Daur	Lubrak	Sherpa_Khumbu	-0.000385	-1.354	16522	16648	327444
Mbuti	DevilsCave_N	Lubrak	Sherpa_Khumbu	-0.000854	-2.194	16520	16799	327204
Mbuti	Dungan	Lubrak	Sherpa_Khumbu	-0.000159	-0.573	16479	16531	325976
Mbuti	Gurung	Lubrak	Sherpa_Khumbu	-0.00081	-2.727	16414	16679	326814
Mbuti	Han	Lubrak	Sherpa_Khumbu	-0.000213	-0.764	16587	16657	327444
Mbuti	HanNorth	Lubrak	Sherpa_Khumbu	-3.1e-05	-0.108	16605	16615	327444
Mbuti	Hezhen	Lubrak	Sherpa_Khumbu	-0.00035	-1.207	16531	16645	327444
Mbuti	HMMH_MN	Lubrak	Sherpa_Khumbu	-0.000457	-0.854	10036	10128	200149
Mbuti	Japanese	Lubrak	Sherpa_Khumbu	-0.000191	-0.687	16583	16646	327444
Mbuti	Kinh	Lubrak	Sherpa_Khumbu	-0.000162	-0.564	16544	16597	327444
Mbuti	Korean	Lubrak	Sherpa_Khumbu	-0.000122	-0.399	16623	16663	327443
Mbuti	Kyang	Lubrak	Sherpa_Khumbu	-0.002771	-8.739	16285	17193	327444
Mbuti	Lahu	Lubrak	Sherpa_Khumbu	-0.000117	-0.386	16568	16606	327444
Mbuti	Liangdao1	Lubrak	Sherpa_Khumbu	-0.000462	-0.891	8283	8361	168357
Mbuti	Liangdao2	Lubrak	Sherpa_Khumbu	-0.00138	-2.96	14682	15092	297141
Mbuti	McColl_SEA_GR1	Lubrak	Sherpa_Khumbu	-0.000215	-0.379	5278	5302	110738
Mbuti	McColl_SEA_GR2	Lubrak	Sherpa_Khumbu	-0.000389	-1.051	15202	15321	306659
Mbuti	McColl_SEA_GR3	Lubrak	Sherpa_Khumbu	-0.001934	-3.582	4704	4906	104412
Mbuti	McColl_SEA_GR31	Lubrak	Sherpa_Khumbu	-0.000492	-0.693	3748	3785	74424
Mbuti	McColl_SEA_GR4	Lubrak	Sherpa_Khumbu	-0.000284	-0.59	7935	7981	162562
Mbuti	McColl_SEA_GR41	Lubrak	Sherpa_Khumbu	-0.000306	-0.326	1874	1886	38618
Mbuti	McColl_SEA_GR5	Lubrak	Sherpa_Khumbu	0.000165	0.175	1688	1683	34547
Mbuti	McColl_SEA_GR6	Lubrak	Sherpa_Khumbu	-0.000391	-0.715	7062	7118	143014
Mbuti	Mebrak	Lubrak	Sherpa_Khumbu	-0.003739	-11.069	16167	17392	327444
Mbuti	Miao	Lubrak	Sherpa_Khumbu	-0.000295	-0.985	16576	16672	327444
Mbuti	Miaozigou_MN	Lubrak	Sherpa_Khumbu	-0.000259	-0.427	5313	5341	105216
Mbuti	Mongola	Lubrak	Sherpa_Khumbu	-0.000137	-0.468	16571	16616	327444
Mbuti	Naga	Lubrak	Sherpa_Khumbu	-0.000329	-1.132	16599	16706	327444
Mbuti	Nanai	Lubrak	Sherpa_Khumbu	-0.000345	-1.183	16522	16634	325976
Mbuti	Naxi	Lubrak	Sherpa_Khumbu	-0.000336	-1.154	16587	16697	327444
Mbuti	Negidal	Lubrak	Sherpa_Khumbu	-6.5e-05	-0.203	16575	16597	325976
Mbuti	Nivh	Lubrak	Sherpa_Khumbu	-0.000252	-0.816	16520	16602	325976
Mbuti	Nubri.LC	Lubrak	Sherpa_Khumbu	-0.000685	-2.249	16531	16756	327444
Mbuti	Nyshi	Lubrak	Sherpa_Khumbu	-0.000188	-0.574	16610	16672	327444
Mbuti	Oroqen	Lubrak	Sherpa_Khumbu	-0.00036	-1.231	16546	16664	327444
Mbuti	Qiang_Danba	Lubrak	Sherpa_Khumbu	2.7e-05	0.095	16656	16647	326814
Mbuti	Qiang_Daofu	Lubrak	Sherpa_Khumbu	-0.000298	-1.031	16602	16700	326814
Mbuti	Qihe	Lubrak	Sherpa_Khumbu	-0.000803	-1.421	6729	6839	137853
Mbuti	Rhirhi	Lubrak	Sherpa_Khumbu	-0.004105	-10.416	16015	17350	325057
Mbuti	Samdzong	Lubrak	Sherpa_Khumbu	-0.002806	-8.827	16293	17212	327444
Mbuti	Semende	Lubrak	Sherpa_Khumbu	-0.000257	-0.877	16481	16565	327444
Mbuti	She	Lubrak	Sherpa_Khumbu	-0.000581	-1.987	16537	16727	327444
Mbuti	Sherpa_Khumbu.LC	Lubrak	Sherpa_Khumbu	0.004629	14.8	17559	16043	327444
Mbuti	Sherpa_Nakatsuka	Lubrak	Sherpa_Khumbu	0.000502	1.575	16635	16470	327444
Mbuti	Sherpa_Wang	Lubrak	Sherpa_Khumbu	0.001476	4.83	16934	16452	326814
Mbuti	Shimao_LN	Lubrak	Sherpa_Khumbu	0.000111	0.295	16540	16504	325416
Mbuti	Suila	Lubrak	Sherpa_Khumbu	-0.004231	-7.624	11489	12481	234669
Mbuti	Suogang	Lubrak	Sherpa_Khumbu	-0.001562	-1.569	1636	1689	34413
Mbuti	Tamang	Lubrak	Sherpa_Khumbu	-0.00059	-2.06	16391	16584	326814
Mbuti	Tanshishan	Lubrak	Sherpa_Khumbu	-0.0009	-1.884	7909	8054	161081
Mbuti	Thai	Lubrak	Sherpa_Khumbu	-0.000218	-0.787	16407	16479	327444
Mbuti	Tibetan_Chamdo	Lubrak	Sherpa_Khumbu	-0.000102	-0.356	16628	16662	326814
Mbuti	Tibetan_Gangcha	Lubrak	Sherpa_Khumbu	-0.00018	-0.668	16564	16623	326814
Mbuti	Tibetan_Gannan	Lubrak	Sherpa_Khumbu	-7.7e-05	-0.255	16541	16566	326814
Mbuti	Tibetan_Lhasa	Lubrak	Sherpa_Khumbu	-0.000702	-2.415	16552	16781	326814
Mbuti	Tibetan_Nagqu	Lubrak	Sherpa_Khumbu	-0.000263	-0.909	16613	16699	326814
Mbuti	Tibetan_Shannan	Lubrak	Sherpa_Khumbu	-0.000813	-2.874	16538	16804	326814
Mbuti	Tibetan_Shigatse	Lubrak	Sherpa_Khumbu	-0.000655	-2.38	16552	16766	326814
Mbuti	Tibetan_Xinlong	Lubrak	Sherpa_Khumbu	-0.000215	-0.745	16596	16666	326814
Mbuti	Tibetan_Xunhua	Lubrak	Sherpa_Khumbu	-0.000241	-0.799	16585	16664	326814
Mbuti	Tibetan_Yajiang	Lubrak	Sherpa_Khumbu	-0.000213	-0.746	16601	16670	326814
Mbuti	Tibetan_Yunnan	Lubrak	Sherpa_Khumbu	-0.000477	-1.519	16588	16744	326814
Mbuti	Tsum.LC	Lubrak	Sherpa_Khumbu	-0.00098	-3.218	16516	16837	327444
Mbuti	Tu	Lubrak	Sherpa_Khumbu	-1.5e-05	-0.053	16581	16586	327444
Mbuti	Tujia	Lubrak	Sherpa_Khumbu	-0.000415	-1.438	16565	16701	327444
Mbuti	Ulchi	Lubrak	Sherpa_Khumbu	-0.000224	-0.794	16542	16615	327444
Mbuti	UpperMustang	Lubrak	Sherpa_Khumbu	-0.00087	-3.017	16513	16797	327444
Mbuti	UpperMustang.LC	Lubrak	Sherpa_Khumbu	-0.000696	-2.463	16544	16772	327444
Mbuti	Upper_YR_IA	Lubrak	Sherpa_Khumbu	-0.000592	-1.587	16168	16358	319636
Mbuti	Upper_YR_LN	Lubrak	Sherpa_Khumbu	-0.000154	-0.461	16608	16658	326230
Mbuti	WLR_BA	Lubrak	Sherpa_Khumbu	-0.000472	-0.967	9782	9873	194076
Mbuti	WLR_BA_o	Lubrak	Sherpa_Khumbu	0.000174	0.364	12067	12026	237888
Mbuti	WLR_LN	Lubrak	Sherpa_Khumbu	-0.001037	-2.594	14604	14906	291387
Mbuti	WLR_MN	Lubrak	Sherpa_Khumbu	-0.001123	-2.836	16414	16780	326275
Mbuti	Xiaogao	Lubrak	Sherpa_Khumbu	-0.000959	-2.076	15303	15594	303597
Mbuti	Xiaojingshan	Lubrak	Sherpa_Khumbu	-0.001547	-3.686	10842	11182	219659
Mbuti	Xibo	Lubrak	Sherpa_Khumbu	-0.000183	-0.629	16536	16596	327444
Mbuti	Xitoucun	Lubrak	Sherpa_Khumbu	-0.001965	-4.546	10455	10877	214456
Mbuti	Yi	Lubrak	Sherpa_Khumbu	-0.000193	-0.656	16617	16680	327444
Mbuti	YR_LBIA	Lubrak	Sherpa_Khumbu	-0.000628	-1.883	16470	16675	326761
Mbuti	YR_LN	Lubrak	Sherpa_Khumbu	-0.000542	-1.738	16567	16744	327427
Mbuti	YR_MN	Lubrak	Sherpa_Khumbu	-0.000297	-0.824	16563	16660	326644
Mbuti	Yumin	Lubrak	Sherpa_Khumbu	-0.001389	-2.798	14702	15114	296146
Mbuti	Ami	Lubrak	Sherpa_Khumbu.LC	-0.000349	-1.146	16503	16617	327444
Mbuti	AR_EN	Lubrak	Sherpa_Khumbu.LC	-0.000762	-1.282	5876	5966	117846
Mbuti	AR_IA	Lubrak	Sherpa_Khumbu.LC	-0.000421	-0.299	958	966	19209
Mbuti	AR_Xianbei_IA	Lubrak	Sherpa_Khumbu.LC	-0.000938	-1.568	5490	5593	109485
Mbuti	Atayal	Lubrak	Sherpa_Khumbu.LC	-0.000139	-0.427	16512	16557	327444
Mbuti	Bianbian	Lubrak	Sherpa_Khumbu.LC	-0.000642	-1.281	12838	13003	256626
Mbuti	Borneo	Lubrak	Sherpa_Khumbu.LC	-0.000207	-0.707	16432	16499	327444
Mbuti	Boshan	Lubrak	Sherpa_Khumbu.LC	-0.001044	-2.176	15682	16010	314172
Mbuti	Cambodian	Lubrak	Sherpa_Khumbu.LC	0.000247	0.863	16453	16372	327444
Mbuti	Chokhopani	Lubrak	Sherpa_Khumbu.LC	-0.002177	-5.462	16332	17045	327415
Mbuti	Chuanyun	Lubrak	Sherpa_Khumbu.LC	-0.0017	-2.891	6370	6589	128627
Mbuti	Dai	Lubrak	Sherpa_Khumbu.LC	-0.000111	-0.379	16523	16560	327444
Mbuti	Daur	Lubrak	Sherpa_Khumbu.LC	-0.000296	-1.016	16507	16604	327444
Mbuti	DevilsCave_N	Lubrak	Sherpa_Khumbu.LC	-0.000834	-2.164	16484	16757	327204
Mbuti	Dungan	Lubrak	Sherpa_Khumbu.LC	-6.7e-05	-0.238	16462	16484	325976
Mbuti	Gurung	Lubrak	Sherpa_Khumbu.LC	-0.000718	-2.322	16400	16635	326814
Mbuti	Han	Lubrak	Sherpa_Khumbu.LC	-0.000205	-0.721	16552	16619	327444
Mbuti	HanNorth	Lubrak	Sherpa_Khumbu.LC	-3.7e-05	-0.125	16569	16581	327444
Mbuti	Hezhen	Lubrak	Sherpa_Khumbu.LC	-0.000294	-0.997	16503	16599	327444
Mbuti	HMMH_MN	Lubrak	Sherpa_Khumbu.LC	-0.000556	-1.019	10037	10148	200149
Mbuti	Japanese	Lubrak	Sherpa_Khumbu.LC	-0.000146	-0.525	16556	16603	327444
Mbuti	Kinh	Lubrak	Sherpa_Khumbu.LC	-9.7e-05	-0.338	16514	16546	327444
Mbuti	Korean	Lubrak	Sherpa_Khumbu.LC	-0.000159	-0.522	16590	16643	327443
Mbuti	Kyang	Lubrak	Sherpa_Khumbu.LC	-0.002808	-8.738	16236	17156	327444
Mbuti	Lahu	Lubrak	Sherpa_Khumbu.LC	-8.9e-05	-0.298	16541	16570	327444
Mbuti	Liangdao1	Lubrak	Sherpa_Khumbu.LC	-0.000322	-0.623	8295	8349	168357
Mbuti	Liangdao2	Lubrak	Sherpa_Khumbu.LC	-0.0011	-2.339	14705	15032	297141
Mbuti	McColl_SEA_GR1	Lubrak	Sherpa_Khumbu.LC	-0.000162	-0.278	5271	5289	110738
Mbuti	McColl_SEA_GR2	Lubrak	Sherpa_Khumbu.LC	-0.00051	-1.383	15150	15306	306659
Mbuti	McColl_SEA_GR3	Lubrak	Sherpa_Khumbu.LC	-0.002141	-3.899	4679	4903	104412
Mbuti	McColl_SEA_GR31	Lubrak	Sherpa_Khumbu.LC	-0.000379	-0.518	3750	3778	74424
Mbuti	McColl_SEA_GR4	Lubrak	Sherpa_Khumbu.LC	-0.000107	-0.216	7938	7956	162562
Mbuti	McColl_SEA_GR41	Lubrak	Sherpa_Khumbu.LC	-0.000279	-0.288	1880	1891	38618
Mbuti	McColl_SEA_GR5	Lubrak	Sherpa_Khumbu.LC	-1.8e-05	-0.019	1686	1686	34547
Mbuti	McColl_SEA_GR6	Lubrak	Sherpa_Khumbu.LC	-0.000516	-0.952	7048	7122	143014
Mbuti	Mebrak	Lubrak	Sherpa_Khumbu.LC	-0.003684	-10.927	16144	17350	327444
Mbuti	Miao	Lubrak	Sherpa_Khumbu.LC	-0.000274	-0.907	16550	16640	327444
Mbuti	Miaozigou_MN	Lubrak	Sherpa_Khumbu.LC	-0.000619	-0.997	5275	5340	105216
Mbuti	Mongola	Lubrak	Sherpa_Khumbu.LC	-0.000105	-0.365	16543	16578	327444
Mbuti	Naga	Lubrak	Sherpa_Khumbu.LC	-0.000196	-0.666	16580	16644	327444
Mbuti	Nanai	Lubrak	Sherpa_Khumbu.LC	-0.000374	-1.26	16477	16599	325976
Mbuti	Naxi	Lubrak	Sherpa_Khumbu.LC	-0.000345	-1.177	16542	16655	327444
Mbuti	Negidal	Lubrak	Sherpa_Khumbu.LC	-8.6e-05	-0.257	16538	16566	325976
Mbuti	Nivh	Lubrak	Sherpa_Khumbu.LC	-0.000327	-1.052	16467	16574	325976
Mbuti	Nubri.LC	Lubrak	Sherpa_Khumbu.LC	-0.000662	-2.129	16502	16718	327444
Mbuti	Nyshi	Lubrak	Sherpa_Khumbu.LC	-0.000232	-0.699	16573	16649	327444
Mbuti	Oroqen	Lubrak	Sherpa_Khumbu.LC	-0.000402	-1.366	16506	16638	327444
Mbuti	Qiang_Danba	Lubrak	Sherpa_Khumbu.LC	-8e-06	-0.026	16615	16617	326814
Mbuti	Qiang_Daofu	Lubrak	Sherpa_Khumbu.LC	-0.000291	-1.002	16573	16668	326814
Mbuti	Qihe	Lubrak	Sherpa_Khumbu.LC	-0.001123	-1.97	6706	6860	137853
Mbuti	Rhirhi	Lubrak	Sherpa_Khumbu.LC	-0.004042	-10.042	15997	17311	325057
Mbuti	Samdzong	Lubrak	Sherpa_Khumbu.LC	-0.002754	-8.669	16276	17177	327444
Mbuti	Semende	Lubrak	Sherpa_Khumbu.LC	-0.000176	-0.585	16457	16515	327444
Mbuti	She	Lubrak	Sherpa_Khumbu.LC	-0.000598	-2.029	16500	16696	327444
Mbuti	Sherpa_Khumbu	Lubrak	Sherpa_Khumbu.LC	0.004783	16.092	17559	15992	327444
Mbuti	Sherpa_Nakatsuka	Lubrak	Sherpa_Khumbu.LC	0.000634	1.968	16631	16423	327444
Mbuti	Sherpa_Wang	Lubrak	Sherpa_Khumbu.LC	0.001459	4.697	16896	16419	326814
Mbuti	Shimao_LN	Lubrak	Sherpa_Khumbu.LC	0.000268	0.686	16535	16448	325416
Mbuti	Suila	Lubrak	Sherpa_Khumbu.LC	-0.004181	-7.261	11489	12470	234669
Mbuti	Suogang	Lubrak	Sherpa_Khumbu.LC	-0.001748	-1.651	1641	1701	34413
Mbuti	Tamang	Lubrak	Sherpa_Khumbu.LC	-0.000674	-2.371	16341	16561	326814
Mbuti	Tanshishan	Lubrak	Sherpa_Khumbu.LC	-0.001151	-2.315	7880	8065	161081
Mbuti	Thai	Lubrak	Sherpa_Khumbu.LC	-0.000115	-0.41	16397	16435	327444
Mbuti	Tibetan_Chamdo	Lubrak	Sherpa_Khumbu.LC	-0.000133	-0.457	16589	16633	326814
Mbuti	Tibetan_Gangcha	Lubrak	Sherpa_Khumbu.LC	-0.000187	-0.689	16526	16588	326814
Mbuti	Tibetan_Gannan	Lubrak	Sherpa_Khumbu.LC	-0.000313	-1.039	16467	16570	326814
Mbuti	Tibetan_Lhasa	Lubrak	Sherpa_Khumbu.LC	-0.000712	-2.403	16515	16747	326814
Mbuti	Tibetan_Nagqu	Lubrak	Sherpa_Khumbu.LC	-0.000273	-0.934	16578	16667	326814
Mbuti	Tibetan_Shannan	Lubrak	Sherpa_Khumbu.LC	-0.000754	-2.609	16515	16761	326814
Mbuti	Tibetan_Shigatse	Lubrak	Sherpa_Khumbu.LC	-0.000653	-2.35	16516	16729	326814
Mbuti	Tibetan_Xinlong	Lubrak	Sherpa_Khumbu.LC	-0.000187	-0.642	16566	16627	326814
Mbuti	Tibetan_Xunhua	Lubrak	Sherpa_Khumbu.LC	-0.000218	-0.709	16551	16623	326814
Mbuti	Tibetan_Yajiang	Lubrak	Sherpa_Khumbu.LC	-0.000206	-0.711	16572	16640	326814
Mbuti	Tibetan_Yunnan	Lubrak	Sherpa_Khumbu.LC	-0.00053	-1.678	16538	16711	326814
Mbuti	Tsum.LC	Lubrak	Sherpa_Khumbu.LC	-0.001049	-3.477	16474	16818	327444
Mbuti	Tu	Lubrak	Sherpa_Khumbu.LC	-0.000115	-0.413	16526	16564	327444
Mbuti	Tujia	Lubrak	Sherpa_Khumbu.LC	-0.000291	-0.996	16554	16649	327444
Mbuti	Ulchi	Lubrak	Sherpa_Khumbu.LC	-0.000227	-0.792	16501	16576	327444
Mbuti	UpperMustang	Lubrak	Sherpa_Khumbu.LC	-0.00087	-2.979	16475	16760	327444
Mbuti	UpperMustang.LC	Lubrak	Sherpa_Khumbu.LC	-0.000585	-2.036	16521	16712	327444
Mbuti	Upper_YR_IA	Lubrak	Sherpa_Khumbu.LC	-0.000535	-1.42	16144	16315	319636
Mbuti	Upper_YR_LN	Lubrak	Sherpa_Khumbu.LC	-3.8e-05	-0.113	16595	16607	326230
Mbuti	WLR_BA	Lubrak	Sherpa_Khumbu.LC	-0.00046	-0.912	9775	9865	194076
Mbuti	WLR_BA_o	Lubrak	Sherpa_Khumbu.LC	2.1e-05	0.041	12024	12019	237888
Mbuti	WLR_LN	Lubrak	Sherpa_Khumbu.LC	-0.001002	-2.457	14569	14861	291387
Mbuti	WLR_MN	Lubrak	Sherpa_Khumbu.LC	-0.001101	-2.846	16364	16723	326275
Mbuti	Xiaogao	Lubrak	Sherpa_Khumbu.LC	-0.001213	-2.667	15238	15606	303597
Mbuti	Xiaojingshan	Lubrak	Sherpa_Khumbu.LC	-0.00156	-3.61	10829	11172	219659
Mbuti	Xibo	Lubrak	Sherpa_Khumbu.LC	-0.000171	-0.578	16496	16551	327444
Mbuti	Xitoucun	Lubrak	Sherpa_Khumbu.LC	-0.001996	-4.53	10445	10873	214456
Mbuti	Yi	Lubrak	Sherpa_Khumbu.LC	-0.000208	-0.719	16576	16644	327444
Mbuti	YR_LBIA	Lubrak	Sherpa_Khumbu.LC	-0.000646	-1.899	16435	16646	326761
Mbuti	YR_LN	Lubrak	Sherpa_Khumbu.LC	-0.0006	-1.864	16518	16714	327427
Mbuti	YR_MN	Lubrak	Sherpa_Khumbu.LC	-0.000457	-1.228	16501	16650	326644
Mbuti	Yumin	Lubrak	Sherpa_Khumbu.LC	-0.001409	-2.796	14662	15079	296146
Mbuti	Ami	Lubrak	Nubri.LC	-0.000541	-1.663	16509	16687	327444
Mbuti	AR_EN	Lubrak	Nubri.LC	-0.000831	-1.386	5894	5992	117846
Mbuti	AR_IA	Lubrak	Nubri.LC	-0.000167	-0.117	950	953	19209
Mbuti	AR_Xianbei_IA	Lubrak	Nubri.LC	-0.001148	-1.892	5482	5607	109485
Mbuti	Atayal	Lubrak	Nubri.LC	-0.000465	-1.381	16512	16664	327444
Mbuti	Bianbian	Lubrak	Nubri.LC	-0.000888	-1.724	12843	13071	256626
Mbuti	Borneo	Lubrak	Nubri.LC	-0.000489	-1.529	16437	16597	327444
Mbuti	Boshan	Lubrak	Nubri.LC	-0.001326	-2.753	15685	16102	314172
Mbuti	Cambodian	Lubrak	Nubri.LC	0.000244	0.788	16497	16417	327444
Mbuti	Chokhopani	Lubrak	Nubri.LC	-0.002192	-5.424	16387	17105	327415
Mbuti	Chuanyun	Lubrak	Nubri.LC	-0.001701	-2.75	6367	6586	128627
Mbuti	Dai	Lubrak	Nubri.LC	-0.000353	-1.144	16526	16642	327444
Mbuti	Daur	Lubrak	Nubri.LC	-0.000525	-1.724	16515	16687	327444
Mbuti	DevilsCave_N	Lubrak	Nubri.LC	-0.001362	-3.391	16429	16875	327204
Mbuti	Dungan	Lubrak	Nubri.LC	-0.000299	-1.017	16467	16565	325976
Mbuti	Gurung	Lubrak	Nubri.LC	-0.000894	-2.761	16426	16718	326814
Mbuti	Han	Lubrak	Nubri.LC	-0.000436	-1.461	16560	16703	327444
Mbuti	HanNorth	Lubrak	Nubri.LC	-0.00023	-0.754	16585	16661	327444
Mbuti	Hezhen	Lubrak	Nubri.LC	-0.000441	-1.407	16529	16673	327444
Mbuti	HMMH_MN	Lubrak	Nubri.LC	-0.0007	-1.268	10030	10170	200149
Mbuti	Japanese	Lubrak	Nubri.LC	-0.000433	-1.463	16548	16690	327444
Mbuti	Kinh	Lubrak	Nubri.LC	-0.00038	-1.256	16519	16643	327444
Mbuti	Korean	Lubrak	Nubri.LC	-0.000343	-1.068	16597	16709	327443
Mbuti	Kyang	Lubrak	Nubri.LC	-0.002695	-7.926	16311	17193	327444
Mbuti	Lahu	Lubrak	Nubri.LC	-0.000467	-1.448	16521	16674	327444
Mbuti	Liangdao1	Lubrak	Nubri.LC	-0.000709	-1.317	8266	8386	168357
Mbuti	Liangdao2	Lubrak	Nubri.LC	-0.00147	-3.053	14678	15115	297141
Mbuti	McColl_SEA_GR1	Lubrak	Nubri.LC	-0.000359	-0.603	5271	5311	110738
Mbuti	McColl_SEA_GR2	Lubrak	Nubri.LC	-0.000669	-1.756	15142	15347	306659
Mbuti	McColl_SEA_GR3	Lubrak	Nubri.LC	-0.001888	-3.428	4718	4915	104412
Mbuti	McColl_SEA_GR31	Lubrak	Nubri.LC	-0.000864	-1.169	3727	3791	74424
Mbuti	McColl_SEA_GR4	Lubrak	Nubri.LC	-0.00049	-0.971	7929	8009	162562
Mbuti	McColl_SEA_GR41	Lubrak	Nubri.LC	-5e-05	-0.05	1897	1899	38618
Mbuti	McColl_SEA_GR5	Lubrak	Nubri.LC	-0.001039	-1.021	1668	1704	34547
Mbuti	McColl_SEA_GR6	Lubrak	Nubri.LC	-0.000681	-1.219	7048	7145	143014
Mbuti	Mebrak	Lubrak	Nubri.LC	-0.00368	-10.827	16197	17402	327444
Mbuti	Miao	Lubrak	Nubri.LC	-0.000527	-1.65	16545	16718	327444
Mbuti	Miaozigou_MN	Lubrak	Nubri.LC	-0.000588	-0.905	5321	5383	105216
Mbuti	Mongola	Lubrak	Nubri.LC	-0.000237	-0.781	16562	16640	327444
Mbuti	Naga	Lubrak	Nubri.LC	-0.000554	-1.779	16569	16750	327444
Mbuti	Nanai	Lubrak	Nubri.LC	-0.000575	-1.884	16497	16684	325976
Mbuti	Naxi	Lubrak	Nubri.LC	-0.000606	-2.029	16549	16747	327444
Mbuti	Negidal	Lubrak	Nubri.LC	-0.00022	-0.633	16563	16634	325976
Mbuti	Nivh	Lubrak	Nubri.LC	-0.000446	-1.382	16496	16642	325976
Mbuti	Nyshi	Lubrak	Nubri.LC	-0.000451	-1.306	16573	16721	327444
Mbuti	Oroqen	Lubrak	Nubri.LC	-0.000611	-1.992	16506	16706	327444
Mbuti	Qiang_Danba	Lubrak	Nubri.LC	-0.000325	-1.065	16600	16706	326814
Mbuti	Qiang_Daofu	Lubrak	Nubri.LC	-0.000413	-1.363	16590	16725	326814
Mbuti	Qihe	Lubrak	Nubri.LC	-0.001453	-2.472	6674	6875	137853
Mbuti	Rhirhi	Lubrak	Nubri.LC	-0.003984	-9.574	16053	17348	325057
Mbuti	Samdzong	Lubrak	Nubri.LC	-0.002801	-8.524	16297	17214	327444
Mbuti	Semende	Lubrak	Nubri.LC	-0.000525	-1.649	16447	16619	327444
Mbuti	She	Lubrak	Nubri.LC	-0.000751	-2.433	16526	16771	327444
Mbuti	Sherpa_Khumbu	Lubrak	Nubri.LC	-0.000938	-3.068	16531	16839	327444
Mbuti	Sherpa_Khumbu.LC	Lubrak	Nubri.LC	-0.001069	-3.276	16502	16852	327444
Mbuti	Sherpa_Nakatsuka	Lubrak	Nubri.LC	-0.000969	-2.933	16370	16688	327444
Mbuti	Sherpa_Wang	Lubrak	Nubri.LC	-0.000777	-2.409	16524	16778	326814
Mbuti	Shimao_LN	Lubrak	Nubri.LC	0.000145	0.357	16565	16518	325416
Mbuti	Suila	Lubrak	Nubri.LC	-0.004438	-7.487	11470	12512	234669
Mbuti	Suogang	Lubrak	Nubri.LC	-0.00256	-2.529	1629	1717	34413
Mbuti	Tamang	Lubrak	Nubri.LC	-0.000809	-2.688	16364	16629	326814
Mbuti	Tanshishan	Lubrak	Nubri.LC	-0.00141	-2.73	7895	8122	161081
Mbuti	Thai	Lubrak	Nubri.LC	-0.000368	-1.26	16390	16510	327444
Mbuti	Tibetan_Chamdo	Lubrak	Nubri.LC	-0.000411	-1.361	16580	16715	326814
Mbuti	Tibetan_Gangcha	Lubrak	Nubri.LC	-0.000394	-1.387	16540	16669	326814
Mbuti	Tibetan_Gannan	Lubrak	Nubri.LC	-0.000323	-1.024	16507	16612	326814
Mbuti	Tibetan_Lhasa	Lubrak	Nubri.LC	-0.000976	-3.141	16515	16834	326814
Mbuti	Tibetan_Nagqu	Lubrak	Nubri.LC	-0.000484	-1.578	16584	16742	326814
Mbuti	Tibetan_Shannan	Lubrak	Nubri.LC	-0.000936	-3.144	16526	16832	326814
Mbuti	Tibetan_Shigatse	Lubrak	Nubri.LC	-0.000775	-2.621	16545	16798	326814
Mbuti	Tibetan_Xinlong	Lubrak	Nubri.LC	-0.000365	-1.201	16577	16696	326814
Mbuti	Tibetan_Xunhua	Lubrak	Nubri.LC	-0.000385	-1.24	16579	16705	326814
Mbuti	Tibetan_Yajiang	Lubrak	Nubri.LC	-0.000444	-1.492	16574	16719	326814
Mbuti	Tibetan_Yunnan	Lubrak	Nubri.LC	-0.000758	-2.289	16539	16787	326814
Mbuti	Tsum.LC	Lubrak	Nubri.LC	-0.000777	-2.436	16570	16824	327444
Mbuti	Tu	Lubrak	Nubri.LC	-0.000382	-1.313	16525	16650	327444
Mbuti	Tujia	Lubrak	Nubri.LC	-0.000472	-1.497	16563	16718	327444
Mbuti	Ulchi	Lubrak	Nubri.LC	-0.000345	-1.168	16526	16639	327444
Mbuti	UpperMustang	Lubrak	Nubri.LC	-0.000476	-1.566	16598	16754	327444
Mbuti	UpperMustang.LC	Lubrak	Nubri.LC	-0.000852	-2.79	16525	16804	327444
Mbuti	Upper_YR_IA	Lubrak	Nubri.LC	-0.000757	-1.92	16155	16397	319636
Mbuti	Upper_YR_LN	Lubrak	Nubri.LC	-0.000385	-1.082	16583	16709	326230
Mbuti	WLR_BA	Lubrak	Nubri.LC	-0.001082	-2.145	9721	9931	194076
Mbuti	WLR_BA_o	Lubrak	Nubri.LC	-0.000437	-0.857	11987	12091	237888
Mbuti	WLR_LN	Lubrak	Nubri.LC	-0.001205	-2.84	14585	14936	291387
Mbuti	WLR_MN	Lubrak	Nubri.LC	-0.00167	-4.189	16316	16861	326275
Mbuti	Xiaogao	Lubrak	Nubri.LC	-0.001492	-3.124	15218	15671	303597
Mbuti	Xiaojingshan	Lubrak	Nubri.LC	-0.002261	-5.004	10784	11281	219659
Mbuti	Xibo	Lubrak	Nubri.LC	-0.000389	-1.259	16508	16635	327444
Mbuti	Xitoucun	Lubrak	Nubri.LC	-0.00245	-5.32	10409	10935	214456
Mbuti	Yi	Lubrak	Nubri.LC	-0.000478	-1.579	16573	16730	327444
Mbuti	YR_LBIA	Lubrak	Nubri.LC	-0.00074	-2.086	16472	16714	326761
Mbuti	YR_LN	Lubrak	Nubri.LC	-0.000726	-2.175	16544	16782	327427
Mbuti	YR_MN	Lubrak	Nubri.LC	-0.000675	-1.758	16512	16732	326644
Mbuti	Yumin	Lubrak	Nubri.LC	-0.001665	-3.239	14661	15154	296146
Mbuti	Ami	Lubrak	Tsum.LC	-0.000494	-1.627	16487	16648	327444
Mbuti	AR_EN	Lubrak	Tsum.LC	-0.000899	-1.605	5849	5955	117846
Mbuti	AR_IA	Lubrak	Tsum.LC	-1e-05	-0.007	969	969	19209
Mbuti	AR_Xianbei_IA	Lubrak	Tsum.LC	-0.001263	-2.124	5463	5601	109485
Mbuti	Atayal	Lubrak	Tsum.LC	-0.000438	-1.364	16479	16622	327444
Mbuti	Bianbian	Lubrak	Tsum.LC	-0.000878	-1.766	12817	13042	256626
Mbuti	Borneo	Lubrak	Tsum.LC	-0.00046	-1.539	16405	16555	327444
Mbuti	Boshan	Lubrak	Tsum.LC	-0.001491	-3.178	15624	16092	314172
Mbuti	Cambodian	Lubrak	Tsum.LC	0.00015	0.515	16453	16403	327444
Mbuti	Chokhopani	Lubrak	Tsum.LC	-0.002285	-5.9	16354	17102	327415
Mbuti	Chuanyun	Lubrak	Tsum.LC	-0.002116	-3.608	6340	6612	128627
Mbuti	Dai	Lubrak	Tsum.LC	-0.000386	-1.305	16493	16620	327444
Mbuti	Daur	Lubrak	Tsum.LC	-0.000757	-2.624	16443	16690	327444
Mbuti	DevilsCave_N	Lubrak	Tsum.LC	-0.001426	-3.749	16383	16850	327204
Mbuti	Dungan	Lubrak	Tsum.LC	-0.000329	-1.196	16435	16542	325976
Mbuti	Gurung	Lubrak	Tsum.LC	-0.000851	-2.805	16405	16683	326814
Mbuti	Han	Lubrak	Tsum.LC	-0.000479	-1.701	16522	16679	327444
Mbuti	HanNorth	Lubrak	Tsum.LC	-0.000315	-1.099	16537	16640	327444
Mbuti	Hezhen	Lubrak	Tsum.LC	-0.000592	-1.996	16470	16664	327444
Mbuti	HMMH_MN	Lubrak	Tsum.LC	-0.001072	-1.98	9974	10189	200149
Mbuti	Japanese	Lubrak	Tsum.LC	-0.00045	-1.601	16516	16663	327444
Mbuti	Kinh	Lubrak	Tsum.LC	-0.00035	-1.211	16497	16612	327444
Mbuti	Korean	Lubrak	Tsum.LC	-0.000464	-1.526	16544	16696	327443
Mbuti	Kyang	Lubrak	Tsum.LC	-0.002894	-9.16	16258	17205	327444
Mbuti	Lahu	Lubrak	Tsum.LC	-0.00034	-1.124	16515	16626	327444
Mbuti	Liangdao1	Lubrak	Tsum.LC	-0.000613	-1.215	8260	8364	168357
Mbuti	Liangdao2	Lubrak	Tsum.LC	-0.001375	-3.009	14690	15099	297141
Mbuti	McColl_SEA_GR1	Lubrak	Tsum.LC	-9e-05	-0.157	5266	5276	110738
Mbuti	McColl_SEA_GR2	Lubrak	Tsum.LC	-0.000585	-1.561	15161	15341	306659
Mbuti	McColl_SEA_GR3	Lubrak	Tsum.LC	-0.002141	-3.847	4693	4917	104412
Mbuti	McColl_SEA_GR31	Lubrak	Tsum.LC	-0.000866	-1.184	3735	3799	74424
Mbuti	McColl_SEA_GR4	Lubrak	Tsum.LC	-0.000804	-1.612	7891	8021	162562
Mbuti	McColl_SEA_GR41	Lubrak	Tsum.LC	-0.000696	-0.729	1858	1885	38618
Mbuti	McColl_SEA_GR5	Lubrak	Tsum.LC	0.000255	0.261	1690	1682	34547
Mbuti	McColl_SEA_GR6	Lubrak	Tsum.LC	-0.000551	-0.973	7046	7124	143014
Mbuti	Mebrak	Lubrak	Tsum.LC	-0.003649	-10.941	16180	17375	327444
Mbuti	Miao	Lubrak	Tsum.LC	-0.000533	-1.78	16519	16694	327444
Mbuti	Miaozigou_MN	Lubrak	Tsum.LC	-0.001328	-2.13	5265	5405	105216
Mbuti	Mongola	Lubrak	Tsum.LC	-0.000473	-1.639	16495	16650	327444
Mbuti	Naga	Lubrak	Tsum.LC	-0.000551	-1.855	16547	16727	327444
Mbuti	Nanai	Lubrak	Tsum.LC	-0.000796	-2.765	16423	16683	325976
Mbuti	Naxi	Lubrak	Tsum.LC	-0.000615	-2.111	16520	16722	327444
Mbuti	Negidal	Lubrak	Tsum.LC	-0.000583	-1.772	16462	16652	325976
Mbuti	Nivh	Lubrak	Tsum.LC	-0.0007	-2.257	16413	16641	325976
Mbuti	Nubri.LC	Lubrak	Tsum.LC	-0.000453	-1.474	16570	16718	327444
Mbuti	Nyshi	Lubrak	Tsum.LC	-0.000512	-1.542	16545	16712	327444
Mbuti	Oroqen	Lubrak	Tsum.LC	-0.000758	-2.585	16458	16706	327444
Mbuti	Qiang_Danba	Lubrak	Tsum.LC	-0.000377	-1.293	16558	16681	326814
Mbuti	Qiang_Daofu	Lubrak	Tsum.LC	-0.000615	-2.104	16528	16729	326814
Mbuti	Qihe	Lubrak	Tsum.LC	-0.000811	-1.412	6733	6845	137853
Mbuti	Rhirhi	Lubrak	Tsum.LC	-0.004077	-10.271	16012	17337	325057
Mbuti	Samdzong	Lubrak	Tsum.LC	-0.002811	-8.893	16286	17206	327444
Mbuti	Semende	Lubrak	Tsum.LC	-0.00045	-1.511	16433	16581	327444
Mbuti	She	Lubrak	Tsum.LC	-0.000738	-2.494	16495	16736	327444
Mbuti	Sherpa_Khumbu	Lubrak	Tsum.LC	-0.000908	-3.063	16516	16814	327444
Mbuti	Sherpa_Khumbu.LC	Lubrak	Tsum.LC	-0.001132	-3.64	16474	16845	327444
Mbuti	Sherpa_Nakatsuka	Lubrak	Tsum.LC	-0.001001	-3.158	16352	16680	327444
Mbuti	Sherpa_Wang	Lubrak	Tsum.LC	-0.000863	-2.764	16476	16758	326814
Mbuti	Shimao_LN	Lubrak	Tsum.LC	-0.000245	-0.645	16450	16529	325416
Mbuti	Suila	Lubrak	Tsum.LC	-0.003937	-7.239	11535	12459	234669
Mbuti	Suogang	Lubrak	Tsum.LC	-0.003158	-3.111	1611	1719	34413
Mbuti	Tamang	Lubrak	Tsum.LC	-0.000788	-2.708	16357	16614	326814
Mbuti	Tanshishan	Lubrak	Tsum.LC	-0.001393	-2.851	7868	8093	161081
Mbuti	Thai	Lubrak	Tsum.LC	-0.000286	-1.018	16381	16475	327444
Mbuti	Tibetan_Chamdo	Lubrak	Tsum.LC	-0.000534	-1.842	16532	16706	326814
Mbuti	Tibetan_Gangcha	Lubrak	Tsum.LC	-0.000488	-1.774	16492	16652	326814
Mbuti	Tibetan_Gannan	Lubrak	Tsum.LC	-0.000374	-1.234	16472	16595	326814
Mbuti	Tibetan_Lhasa	Lubrak	Tsum.LC	-0.000977	-3.325	16487	16806	326814
Mbuti	Tibetan_Nagqu	Lubrak	Tsum.LC	-0.000606	-2.037	16539	16737	326814
Mbuti	Tibetan_Shannan	Lubrak	Tsum.LC	-0.00106	-3.676	16481	16827	326814
Mbuti	Tibetan_Shigatse	Lubrak	Tsum.LC	-0.000994	-3.455	16473	16798	326814
Mbuti	Tibetan_Xinlong	Lubrak	Tsum.LC	-0.000583	-1.977	16517	16708	326814
Mbuti	Tibetan_Xunhua	Lubrak	Tsum.LC	-0.000381	-1.269	16547	16672	326814
Mbuti	Tibetan_Yajiang	Lubrak	Tsum.LC	-0.000514	-1.778	16537	16705	326814
Mbuti	Tibetan_Yunnan	Lubrak	Tsum.LC	-0.000716	-2.278	16527	16761	326814
Mbuti	Tu	Lubrak	Tsum.LC	-0.000395	-1.428	16501	16630	327444
Mbuti	Tujia	Lubrak	Tsum.LC	-0.000573	-1.949	16523	16711	327444
Mbuti	Ulchi	Lubrak	Tsum.LC	-0.000561	-2.021	16458	16642	327444
Mbuti	UpperMustang	Lubrak	Tsum.LC	-0.000424	-1.442	16582	16720	327444
Mbuti	UpperMustang.LC	Lubrak	Tsum.LC	-0.000935	-3.287	16487	16794	327444
Mbuti	Upper_YR_IA	Lubrak	Tsum.LC	-0.000671	-1.807	16131	16345	319636
Mbuti	Upper_YR_LN	Lubrak	Tsum.LC	-0.000362	-1.062	16557	16675	326230
Mbuti	WLR_BA	Lubrak	Tsum.LC	-0.001224	-2.474	9697	9934	194076
Mbuti	WLR_BA_o	Lubrak	Tsum.LC	-0.000461	-0.951	11969	12079	237888
Mbuti	WLR_LN	Lubrak	Tsum.LC	-0.001148	-2.809	14557	14891	291387
Mbuti	WLR_MN	Lubrak	Tsum.LC	-0.001285	-3.362	16341	16760	326275
Mbuti	Xiaogao	Lubrak	Tsum.LC	-0.001506	-3.271	15215	15672	303597
Mbuti	Xiaojingshan	Lubrak	Tsum.LC	-0.00202	-4.647	10782	11226	219659
Mbuti	Xibo	Lubrak	Tsum.LC	-0.000592	-2.012	16443	16637	327444
Mbuti	Xitoucun	Lubrak	Tsum.LC	-0.002334	-5.381	10431	10931	214456
Mbuti	Yi	Lubrak	Tsum.LC	-0.000462	-1.595	16551	16702	327444
Mbuti	YR_LBIA	Lubrak	Tsum.LC	-0.000837	-2.543	16425	16699	326761
Mbuti	YR_LN	Lubrak	Tsum.LC	-0.000789	-2.47	16503	16761	327427
Mbuti	YR_MN	Lubrak	Tsum.LC	-0.000633	-1.76	16497	16704	326644
Mbuti	Yumin	Lubrak	Tsum.LC	-0.001794	-3.639	14616	15147	296146
Mbuti	Ami	Lubrak	UpperMustang	-0.000601	-1.931	16511	16707	327444
Mbuti	AR_EN	Lubrak	UpperMustang	-0.000644	-1.102	5897	5973	117846
Mbuti	AR_IA	Lubrak	UpperMustang	-0.000753	-0.546	954	968	19209
Mbuti	AR_Xianbei_IA	Lubrak	UpperMustang	-0.000951	-1.658	5489	5593	109485
Mbuti	Atayal	Lubrak	UpperMustang	-0.00052	-1.625	16508	16678	327444
Mbuti	Bianbian	Lubrak	UpperMustang	-0.000732	-1.485	12865	13053	256626
Mbuti	Borneo	Lubrak	UpperMustang	-0.000432	-1.456	16450	16592	327444
Mbuti	Boshan	Lubrak	UpperMustang	-0.001249	-2.683	15709	16101	314172
Mbuti	Cambodian	Lubrak	UpperMustang	7.3e-05	0.254	16476	16452	327444
Mbuti	Chokhopani	Lubrak	UpperMustang	-0.002314	-5.837	16389	17147	327415
Mbuti	Chuanyun	Lubrak	UpperMustang	-0.001495	-2.521	6394	6586	128627
Mbuti	Dai	Lubrak	UpperMustang	-0.000398	-1.361	16528	16658	327444
Mbuti	Daur	Lubrak	UpperMustang	-0.00056	-1.923	16517	16700	327444
Mbuti	DevilsCave_N	Lubrak	UpperMustang	-0.001241	-3.223	16447	16853	327204
Mbuti	Dungan	Lubrak	UpperMustang	-0.000347	-1.23	16473	16586	325976
Mbuti	Gurung	Lubrak	UpperMustang	-0.000867	-2.846	16432	16715	326814
Mbuti	Han	Lubrak	UpperMustang	-0.000504	-1.784	16557	16722	327444
Mbuti	HanNorth	Lubrak	UpperMustang	-0.000303	-1.027	16580	16679	327444
Mbuti	Hezhen	Lubrak	UpperMustang	-0.000599	-2.006	16513	16709	327444
Mbuti	HMMH_MN	Lubrak	UpperMustang	-0.000951	-1.746	10000	10190	200149
Mbuti	Japanese	Lubrak	UpperMustang	-0.000431	-1.518	16560	16702	327444
Mbuti	Kinh	Lubrak	UpperMustang	-0.000453	-1.564	16512	16661	327444
Mbuti	Korean	Lubrak	UpperMustang	-0.00032	-1.036	16610	16715	327443
Mbuti	Kyang	Lubrak	UpperMustang	-0.003024	-9.378	16265	17255	327444
Mbuti	Lahu	Lubrak	UpperMustang	-0.000486	-1.626	16528	16687	327444
Mbuti	Liangdao1	Lubrak	UpperMustang	-0.000793	-1.554	8285	8418	168357
Mbuti	Liangdao2	Lubrak	UpperMustang	-0.001138	-2.5	14756	15094	297141
Mbuti	McColl_SEA_GR1	Lubrak	UpperMustang	-0.000479	-0.832	5262	5315	110738
Mbuti	McColl_SEA_GR2	Lubrak	UpperMustang	-0.000494	-1.347	15206	15357	306659
Mbuti	McColl_SEA_GR3	Lubrak	UpperMustang	-0.002156	-3.894	4705	4930	104412
Mbuti	McColl_SEA_GR31	Lubrak	UpperMustang	-0.000814	-1.142	3729	3789	74424
Mbuti	McColl_SEA_GR4	Lubrak	UpperMustang	-0.000401	-0.832	7932	7997	162562
Mbuti	McColl_SEA_GR41	Lubrak	UpperMustang	-0.000126	-0.133	1886	1891	38618
Mbuti	McColl_SEA_GR5	Lubrak	UpperMustang	-0.000325	-0.334	1684	1695	34547
Mbuti	McColl_SEA_GR6	Lubrak	UpperMustang	-0.001056	-1.943	7025	7176	143014
Mbuti	Mebrak	Lubrak	UpperMustang	-0.003602	-10.726	16214	17393	327444
Mbuti	Miao	Lubrak	UpperMustang	-0.00053	-1.753	16555	16729	327444
Mbuti	Miaozigou_MN	Lubrak	UpperMustang	-0.001257	-2.059	5280	5413	105216
Mbuti	Mongola	Lubrak	UpperMustang	-0.000383	-1.312	16549	16674	327444
Mbuti	Naga	Lubrak	UpperMustang	-0.000603	-2.056	16562	16760	327444
Mbuti	Nanai	Lubrak	UpperMustang	-0.000561	-1.896	16507	16689	325976
Mbuti	Naxi	Lubrak	UpperMustang	-0.000589	-2.054	16561	16754	327444
Mbuti	Negidal	Lubrak	UpperMustang	-0.000355	-1.087	16544	16660	325976
Mbuti	Nivh	Lubrak	UpperMustang	-0.000429	-1.395	16507	16647	325976
Mbuti	Nubri.LC	Lubrak	UpperMustang	-0.000491	-1.591	16598	16759	327444
Mbuti	Nyshi	Lubrak	UpperMustang	-0.000439	-1.357	16591	16735	327444
Mbuti	Oroqen	Lubrak	UpperMustang	-0.00067	-2.269	16512	16732	327444
Mbuti	Qiang_Danba	Lubrak	UpperMustang	-0.000374	-1.275	16597	16719	326814
Mbuti	Qiang_Daofu	Lubrak	UpperMustang	-0.000605	-2.102	16570	16768	326814
Mbuti	Qihe	Lubrak	UpperMustang	-0.00098	-1.71	6733	6868	137853
Mbuti	Rhirhi	Lubrak	UpperMustang	-0.004133	-10.433	16035	17378	325057
Mbuti	Samdzong	Lubrak	UpperMustang	-0.002904	-9.271	16290	17241	327444
Mbuti	Semende	Lubrak	UpperMustang	-0.00046	-1.532	16470	16621	327444
Mbuti	She	Lubrak	UpperMustang	-0.000793	-2.652	16525	16785	327444
Mbuti	Sherpa_Khumbu	Lubrak	UpperMustang	-0.001137	-3.842	16513	16885	327444
Mbuti	Sherpa_Khumbu.LC	Lubrak	UpperMustang	-0.001291	-4.106	16475	16898	327444
Mbuti	Sherpa_Nakatsuka	Lubrak	UpperMustang	-0.00092	-2.976	16394	16696	327444
Mbuti	Sherpa_Wang	Lubrak	UpperMustang	-0.000742	-2.409	16545	16787	326814
Mbuti	Shimao_LN	Lubrak	UpperMustang	-0.000245	-0.629	16503	16582	325416
Mbuti	Suila	Lubrak	UpperMustang	-0.003605	-6.34	11596	12442	234669
Mbuti	Suogang	Lubrak	UpperMustang	-0.002705	-2.705	1621	1714	34413
Mbuti	Tamang	Lubrak	UpperMustang	-0.000749	-2.585	16391	16635	326814
Mbuti	Tanshishan	Lubrak	UpperMustang	-0.001171	-2.432	7925	8114	161081
Mbuti	Thai	Lubrak	UpperMustang	-0.000362	-1.277	16409	16528	327444
Mbuti	Tibetan_Chamdo	Lubrak	UpperMustang	-0.000655	-2.242	16546	16760	326814
Mbuti	Tibetan_Gangcha	Lubrak	UpperMustang	-0.000538	-1.964	16519	16694	326814
Mbuti	Tibetan_Gannan	Lubrak	UpperMustang	-0.000486	-1.605	16493	16652	326814
Mbuti	Tibetan_Lhasa	Lubrak	UpperMustang	-0.001051	-3.515	16512	16856	326814
Mbuti	Tibetan_Nagqu	Lubrak	UpperMustang	-0.000742	-2.536	16543	16785	326814
Mbuti	Tibetan_Shannan	Lubrak	UpperMustang	-0.001159	-3.973	16496	16875	326814
Mbuti	Tibetan_Shigatse	Lubrak	UpperMustang	-0.00106	-3.792	16494	16840	326814
Mbuti	Tibetan_Xinlong	Lubrak	UpperMustang	-0.000622	-2.11	16546	16749	326814
Mbuti	Tibetan_Xunhua	Lubrak	UpperMustang	-0.000532	-1.742	16555	16729	326814
Mbuti	Tibetan_Yajiang	Lubrak	UpperMustang	-0.000617	-2.154	16548	16750	326814
Mbuti	Tibetan_Yunnan	Lubrak	UpperMustang	-0.000748	-2.364	16554	16799	326814
Mbuti	Tsum.LC	Lubrak	UpperMustang	-0.000762	-2.507	16582	16831	327444
Mbuti	Tu	Lubrak	UpperMustang	-0.000475	-1.725	16522	16678	327444
Mbuti	Tujia	Lubrak	UpperMustang	-0.000679	-2.281	16539	16761	327444
Mbuti	Ulchi	Lubrak	UpperMustang	-0.00039	-1.38	16534	16662	327444
Mbuti	UpperMustang.LC	Lubrak	UpperMustang	-0.000339	-1.19	16630	16741	327444
Mbuti	Upper_YR_IA	Lubrak	UpperMustang	-0.000884	-2.346	16135	16417	319636
Mbuti	Upper_YR_LN	Lubrak	UpperMustang	-0.000339	-0.982	16601	16711	326230
Mbuti	WLR_BA	Lubrak	UpperMustang	-0.000749	-1.523	9752	9897	194076
Mbuti	WLR_BA_o	Lubrak	UpperMustang	-0.000419	-0.864	11992	12092	237888
Mbuti	WLR_LN	Lubrak	UpperMustang	-0.001455	-3.581	14558	14982	291387
Mbuti	WLR_MN	Lubrak	UpperMustang	-0.001326	-3.361	16397	16830	326275
Mbuti	Xiaogao	Lubrak	UpperMustang	-0.001626	-3.469	15218	15712	303597
Mbuti	Xiaojingshan	Lubrak	UpperMustang	-0.0019	-4.459	10821	11238	219659
Mbuti	Xibo	Lubrak	UpperMustang	-0.000479	-1.62	16505	16661	327444
Mbuti	Xitoucun	Lubrak	UpperMustang	-0.002409	-5.55	10429	10946	214456
Mbuti	Yi	Lubrak	UpperMustang	-0.00051	-1.756	16579	16746	327444
Mbuti	YR_LBIA	Lubrak	UpperMustang	-0.000788	-2.36	16473	16730	326761
Mbuti	YR_LN	Lubrak	UpperMustang	-0.000824	-2.568	16536	16806	327427
Mbuti	YR_MN	Lubrak	UpperMustang	-0.000567	-1.569	16537	16722	326644
Mbuti	Yumin	Lubrak	UpperMustang	-0.00204	-4.122	14616	15220	296146
Mbuti	Ami	Lubrak	UpperMustang.LC	-0.000423	-1.38	16546	16685	327444
Mbuti	AR_EN	Lubrak	UpperMustang.LC	-0.000839	-1.486	5863	5962	117846
Mbuti	AR_IA	Lubrak	UpperMustang.LC	7e-06	0.005	956	956	19209
Mbuti	AR_Xianbei_IA	Lubrak	UpperMustang.LC	-0.001101	-1.916	5474	5595	109485
Mbuti	Atayal	Lubrak	UpperMustang.LC	-0.000315	-0.991	16550	16653	327444
Mbuti	Bianbian	Lubrak	UpperMustang.LC	-0.000603	-1.233	12894	13048	256626
Mbuti	Borneo	Lubrak	UpperMustang.LC	-0.000542	-1.831	16438	16615	327444
Mbuti	Boshan	Lubrak	UpperMustang.LC	-0.001154	-2.574	15725	16087	314172
Mbuti	Cambodian	Lubrak	UpperMustang.LC	0.000133	0.454	16490	16446	327444
Mbuti	Chokhopani	Lubrak	UpperMustang.LC	-0.002446	-6.272	16363	17164	327415
Mbuti	Chuanyun	Lubrak	UpperMustang.LC	-0.001591	-2.708	6384	6589	128627
Mbuti	Dai	Lubrak	UpperMustang.LC	-0.000373	-1.294	16540	16662	327444
Mbuti	Daur	Lubrak	UpperMustang.LC	-0.000513	-1.76	16533	16700	327444
Mbuti	DevilsCave_N	Lubrak	UpperMustang.LC	-0.001307	-3.465	16452	16880	327204
Mbuti	Dungan	Lubrak	UpperMustang.LC	-0.000419	-1.477	16461	16597	325976
Mbuti	Gurung	Lubrak	UpperMustang.LC	-0.001076	-3.569	16394	16746	326814
Mbuti	Han	Lubrak	UpperMustang.LC	-0.000426	-1.516	16578	16718	327444
Mbuti	HanNorth	Lubrak	UpperMustang.LC	-0.000288	-0.998	16591	16686	327444
Mbuti	Hezhen	Lubrak	UpperMustang.LC	-0.000538	-1.825	16524	16700	327444
Mbuti	HMMH_MN	Lubrak	UpperMustang.LC	-0.000564	-1.073	10030	10143	200149
Mbuti	Japanese	Lubrak	UpperMustang.LC	-0.000398	-1.408	16574	16705	327444
Mbuti	Kinh	Lubrak	UpperMustang.LC	-0.000321	-1.114	16545	16651	327444
Mbuti	Korean	Lubrak	UpperMustang.LC	-0.000383	-1.256	16614	16739	327443
Mbuti	Kyang	Lubrak	UpperMustang.LC	-0.003166	-9.687	16249	17286	327444
Mbuti	Lahu	Lubrak	UpperMustang.LC	-0.000416	-1.367	16546	16682	327444
Mbuti	Liangdao1	Lubrak	UpperMustang.LC	-0.000727	-1.407	8275	8398	168357
Mbuti	Liangdao2	Lubrak	UpperMustang.LC	-0.001279	-2.78	14722	15102	297141
Mbuti	McColl_SEA_GR1	Lubrak	UpperMustang.LC	-4e-06	-0.007	5287	5287	110738
Mbuti	McColl_SEA_GR2	Lubrak	UpperMustang.LC	-0.000524	-1.42	15208	15368	306659
Mbuti	McColl_SEA_GR3	Lubrak	UpperMustang.LC	-0.002035	-3.563	4712	4925	104412
Mbuti	McColl_SEA_GR31	Lubrak	UpperMustang.LC	-0.000568	-0.789	3752	3795	74424
Mbuti	McColl_SEA_GR4	Lubrak	UpperMustang.LC	-0.000411	-0.866	7928	7995	162562
Mbuti	McColl_SEA_GR41	Lubrak	UpperMustang.LC	-0.0001	-0.105	1883	1887	38618
Mbuti	McColl_SEA_GR5	Lubrak	UpperMustang.LC	5e-06	0.005	1692	1691	34547
Mbuti	McColl_SEA_GR6	Lubrak	UpperMustang.LC	-0.000611	-1.124	7057	7144	143014
Mbuti	Mebrak	Lubrak	UpperMustang.LC	-0.003865	-11.577	16174	17439	327444
Mbuti	Miao	Lubrak	UpperMustang.LC	-0.000487	-1.626	16575	16734	327444
Mbuti	Miaozigou_MN	Lubrak	UpperMustang.LC	-0.000898	-1.468	5293	5388	105216
Mbuti	Mongola	Lubrak	UpperMustang.LC	-0.000364	-1.226	16560	16679	327444
Mbuti	Naga	Lubrak	UpperMustang.LC	-0.000571	-1.934	16580	16767	327444
Mbuti	Nanai	Lubrak	UpperMustang.LC	-0.000588	-1.999	16511	16703	325976
Mbuti	Naxi	Lubrak	UpperMustang.LC	-0.000523	-1.805	16578	16749	327444
Mbuti	Negidal	Lubrak	UpperMustang.LC	-0.000327	-0.991	16559	16665	325976
Mbuti	Nivh	Lubrak	UpperMustang.LC	-0.000477	-1.534	16504	16659	325976
Mbuti	Nubri.LC	Lubrak	UpperMustang.LC	-0.00092	-2.978	16525	16826	327444
Mbuti	Nyshi	Lubrak	UpperMustang.LC	-0.000445	-1.384	16599	16745	327444
Mbuti	Oroqen	Lubrak	UpperMustang.LC	-0.000598	-2.012	16532	16728	327444
Mbuti	Qiang_Danba	Lubrak	UpperMustang.LC	-0.000238	-0.813	16634	16712	326814
Mbuti	Qiang_Daofu	Lubrak	UpperMustang.LC	-0.000492	-1.692	16596	16757	326814
Mbuti	Qihe	Lubrak	UpperMustang.LC	-0.00091	-1.598	6727	6852	137853
Mbuti	Rhirhi	Lubrak	UpperMustang.LC	-0.004312	-10.78	16009	17411	325057
Mbuti	Samdzong	Lubrak	UpperMustang.LC	-0.003013	-9.54	16285	17272	327444
Mbuti	Semende	Lubrak	UpperMustang.LC	-0.000475	-1.604	16468	16624	327444
Mbuti	She	Lubrak	UpperMustang.LC	-0.000666	-2.249	16555	16773	327444
Mbuti	Sherpa_Khumbu	Lubrak	UpperMustang.LC	-0.001017	-3.472	16544	16877	327444
Mbuti	Sherpa_Khumbu.LC	Lubrak	UpperMustang.LC	-0.001061	-3.396	16521	16868	327444
Mbuti	Sherpa_Nakatsuka	Lubrak	UpperMustang.LC	-0.001026	-3.293	16383	16719	327444
Mbuti	Sherpa_Wang	Lubrak	UpperMustang.LC	-0.000835	-2.694	16530	16803	326814
Mbuti	Shimao_LN	Lubrak	UpperMustang.LC	-2.4e-05	-0.063	16536	16544	325416
Mbuti	Suila	Lubrak	UpperMustang.LC	-0.003844	-6.705	11567	12469	234669
Mbuti	Suogang	Lubrak	UpperMustang.LC	-0.002178	-2.191	1637	1712	34413
Mbuti	Tamang	Lubrak	UpperMustang.LC	-0.001026	-3.562	16345	16680	326814
Mbuti	Tanshishan	Lubrak	UpperMustang.LC	-0.001392	-2.829	7897	8121	161081
Mbuti	Thai	Lubrak	UpperMustang.LC	-0.000465	-1.649	16397	16549	327444
Mbuti	Tibetan_Chamdo	Lubrak	UpperMustang.LC	-0.00047	-1.611	16588	16742	326814
Mbuti	Tibetan_Gangcha	Lubrak	UpperMustang.LC	-0.000406	-1.475	16555	16688	326814
Mbuti	Tibetan_Gannan	Lubrak	UpperMustang.LC	-0.000416	-1.377	16502	16638	326814
Mbuti	Tibetan_Lhasa	Lubrak	UpperMustang.LC	-0.000988	-3.388	16528	16850	326814
Mbuti	Tibetan_Nagqu	Lubrak	UpperMustang.LC	-0.000567	-1.932	16587	16772	326814
Mbuti	Tibetan_Shannan	Lubrak	UpperMustang.LC	-0.001092	-3.787	16518	16875	326814
Mbuti	Tibetan_Shigatse	Lubrak	UpperMustang.LC	-0.000857	-3.029	16547	16827	326814
Mbuti	Tibetan_Xinlong	Lubrak	UpperMustang.LC	-0.000425	-1.45	16585	16724	326814
Mbuti	Tibetan_Xunhua	Lubrak	UpperMustang.LC	-0.000483	-1.602	16567	16724	326814
Mbuti	Tibetan_Yajiang	Lubrak	UpperMustang.LC	-0.000477	-1.643	16585	16741	326814
Mbuti	Tibetan_Yunnan	Lubrak	UpperMustang.LC	-0.000631	-1.992	16586	16792	326814
Mbuti	Tsum.LC	Lubrak	UpperMustang.LC	-0.001327	-4.42	16487	16922	327444
Mbuti	Tu	Lubrak	UpperMustang.LC	-0.000383	-1.371	16547	16673	327444
Mbuti	Tujia	Lubrak	UpperMustang.LC	-0.000471	-1.586	16585	16739	327444
Mbuti	Ulchi	Lubrak	UpperMustang.LC	-0.000434	-1.52	16530	16672	327444
Mbuti	UpperMustang	Lubrak	UpperMustang.LC	-0.000393	-1.361	16630	16759	327444
Mbuti	Upper_YR_IA	Lubrak	UpperMustang.LC	-0.000831	-2.245	16154	16419	319636
Mbuti	Upper_YR_LN	Lubrak	UpperMustang.LC	-0.00034	-0.995	16608	16718	326230
Mbuti	WLR_BA	Lubrak	UpperMustang.LC	-0.000859	-1.755	9746	9913	194076
Mbuti	WLR_BA_o	Lubrak	UpperMustang.LC	-0.000499	-1.029	12010	12129	237888
Mbuti	WLR_LN	Lubrak	UpperMustang.LC	-0.001183	-2.926	14602	14946	291387
Mbuti	WLR_MN	Lubrak	UpperMustang.LC	-0.00143	-3.694	16376	16842	326275
Mbuti	Xiaogao	Lubrak	UpperMustang.LC	-0.001493	-3.273	15235	15688	303597
Mbuti	Xiaojingshan	Lubrak	UpperMustang.LC	-0.002011	-4.77	10808	11250	219659
Mbuti	Xibo	Lubrak	UpperMustang.LC	-0.000416	-1.412	16526	16662	327444
Mbuti	Xitoucun	Lubrak	UpperMustang.LC	-0.002159	-5.166	10462	10924	214456
Mbuti	Yi	Lubrak	UpperMustang.LC	-0.000431	-1.5	16603	16744	327444
Mbuti	YR_LBIA	Lubrak	UpperMustang.LC	-0.00081	-2.407	16474	16739	326761
Mbuti	YR_LN	Lubrak	UpperMustang.LC	-0.00076	-2.425	16563	16812	327427
Mbuti	YR_MN	Lubrak	UpperMustang.LC	-0.000506	-1.385	16562	16727	326644
Mbuti	Yumin	Lubrak	UpperMustang.LC	-0.001468	-2.979	14714	15148	296146
Mbuti	Ami	Chokhopani	Sherpa_Khumbu	0.000146	0.584	25787	25714	498921
Mbuti	AR_EN	Chokhopani	Sherpa_Khumbu	-0.000418	-0.928	8675	8746	170121
Mbuti	AR_IA	Chokhopani	Sherpa_Khumbu	0.000187	0.193	1398	1393	27444
Mbuti	AR_Xianbei_IA	Chokhopani	Sherpa_Khumbu	-1.1e-05	-0.026	8303	8305	161605
Mbuti	Atayal	Chokhopani	Sherpa_Khumbu	-0.000112	-0.436	25690	25746	498921
Mbuti	Bianbian	Chokhopani	Sherpa_Khumbu	0.000121	0.302	17579	17538	342438
Mbuti	Borneo	Chokhopani	Sherpa_Khumbu	1.9e-05	0.076	25596	25586	498921
Mbuti	Boshan	Chokhopani	Sherpa_Khumbu	7.9e-05	0.214	23635	23599	459890
Mbuti	Cambodian	Chokhopani	Sherpa_Khumbu	-2.8e-05	-0.122	25535	25549	498921
Mbuti	Chuanyun	Chokhopani	Sherpa_Khumbu	3.5e-05	0.081	8491	8486	165199
Mbuti	Dai	Chokhopani	Sherpa_Khumbu	0.000139	0.571	25756	25687	498921
Mbuti	Daur	Chokhopani	Sherpa_Khumbu	0.000374	1.576	25817	25630	498921
Mbuti	DevilsCave_N	Chokhopani	Sherpa_Khumbu	8.5e-05	0.278	25847	25805	498503
Mbuti	Dungan	Chokhopani	Sherpa_Khumbu	0.00034	1.485	25688	25519	496435
Mbuti	Gurung	Chokhopani	Sherpa_Khumbu	-0.000283	-1.152	25603	25744	497967
Mbuti	Han	Chokhopani	Sherpa_Khumbu	0.000226	0.973	25855	25742	498921
Mbuti	HanNorth	Chokhopani	Sherpa_Khumbu	0.000187	0.795	25814	25721	498921
Mbuti	Hezhen	Chokhopani	Sherpa_Khumbu	0.000207	0.854	25794	25691	498921
Mbuti	HMMH_MN	Chokhopani	Sherpa_Khumbu	0.000364	0.955	15571	15461	302357
Mbuti	Japanese	Chokhopani	Sherpa_Khumbu	0.000383	1.642	25875	25684	498921
Mbuti	Kinh	Chokhopani	Sherpa_Khumbu	0.000124	0.517	25738	25676	498921
Mbuti	Korean	Chokhopani	Sherpa_Khumbu	0.000267	1.033	25897	25764	498920
Mbuti	Kyang	Chokhopani	Sherpa_Khumbu	-0.000398	-1.464	25825	26023	498921
Mbuti	Lahu	Chokhopani	Sherpa_Khumbu	0.000224	0.909	25779	25668	498921
Mbuti	Liangdao1	Chokhopani	Sherpa_Khumbu	-0.000598	-1.485	11274	11409	225414
Mbuti	Liangdao2	Chokhopani	Sherpa_Khumbu	-0.000961	-2.704	21389	21796	423434
Mbuti	Lubrak	Chokhopani	Sherpa_Khumbu	-0.000944	-2.464	16810	17119	327415
Mbuti	McColl_SEA_GR1	Chokhopani	Sherpa_Khumbu	-0.000229	-0.553	8322	8362	171969
Mbuti	McColl_SEA_GR2	Chokhopani	Sherpa_Khumbu	-0.000128	-0.451	23633	23693	467001
Mbuti	McColl_SEA_GR3	Chokhopani	Sherpa_Khumbu	-0.000866	-2.179	7381	7518	157980
Mbuti	McColl_SEA_GR31	Chokhopani	Sherpa_Khumbu	0.000594	1.199	5834	5767	113260
Mbuti	McColl_SEA_GR4	Chokhopani	Sherpa_Khumbu	-0.000197	-0.544	12225	12273	245523
Mbuti	McColl_SEA_GR41	Chokhopani	Sherpa_Khumbu	-0.000481	-0.752	2859	2887	58174
Mbuti	McColl_SEA_GR5	Chokhopani	Sherpa_Khumbu	0.001723	2.571	2736	2643	53761
Mbuti	McColl_SEA_GR6	Chokhopani	Sherpa_Khumbu	0.000676	1.715	11303	11153	221300
Mbuti	Mebrak	Chokhopani	Sherpa_Khumbu	-0.001222	-4.372	25650	26259	498918
Mbuti	Miao	Chokhopani	Sherpa_Khumbu	0.000275	1.104	25864	25727	498921
Mbuti	Miaozigou_MN	Chokhopani	Sherpa_Khumbu	0.001114	2.496	7980	7809	153254
Mbuti	Mongola	Chokhopani	Sherpa_Khumbu	0.000397	1.659	25814	25616	498921
Mbuti	Naga	Chokhopani	Sherpa_Khumbu	0.000265	1.064	25886	25754	498921
Mbuti	Nanai	Chokhopani	Sherpa_Khumbu	0.000386	1.587	25822	25630	496435
Mbuti	Naxi	Chokhopani	Sherpa_Khumbu	0.000285	1.191	25876	25733	498921
Mbuti	Negidal	Chokhopani	Sherpa_Khumbu	0.000306	1.081	25799	25647	496435
Mbuti	Nivh	Chokhopani	Sherpa_Khumbu	0.00049	1.891	25802	25559	496435
Mbuti	Nubri.LC	Chokhopani	Sherpa_Khumbu	0.000354	1.328	25907	25731	498921
Mbuti	Nyshi	Chokhopani	Sherpa_Khumbu	0.000106	0.403	25854	25801	498921
Mbuti	Oroqen	Chokhopani	Sherpa_Khumbu	0.000314	1.289	25830	25673	498921
Mbuti	Qiang_Danba	Chokhopani	Sherpa_Khumbu	0.00057	2.342	25983	25699	497967
Mbuti	Qiang_Daofu	Chokhopani	Sherpa_Khumbu	0.000567	2.354	25973	25691	497967
Mbuti	Qihe	Chokhopani	Sherpa_Khumbu	-0.000813	-1.857	8523	8663	171553
Mbuti	Rhirhi	Chokhopani	Sherpa_Khumbu	-0.001495	-4.547	25070	25799	488031
Mbuti	Samdzong	Chokhopani	Sherpa_Khumbu	-0.001012	-3.716	25672	26177	498919
Mbuti	Semende	Chokhopani	Sherpa_Khumbu	0.000211	0.872	25692	25587	498921
Mbuti	She	Chokhopani	Sherpa_Khumbu	0.000161	0.657	25848	25767	498921
Mbuti	Sherpa_Khumbu.LC	Chokhopani	Sherpa_Khumbu	0.006072	23.961	27545	24516	498921
Mbuti	Sherpa_Nakatsuka	Chokhopani	Sherpa_Khumbu	0.001301	4.765	26029	25380	498921
Mbuti	Sherpa_Wang	Chokhopani	Sherpa_Khumbu	0.002397	9.022	26485	25291	497967
Mbuti	Shimao_LN	Chokhopani	Sherpa_Khumbu	0.000219	0.705	25657	25549	494608
Mbuti	Suila	Chokhopani	Sherpa_Khumbu	-0.00142	-3.339	16529	16989	323938
Mbuti	Suogang	Chokhopani	Sherpa_Khumbu	0.000143	0.206	1988	1982	40118
Mbuti	Tamang	Chokhopani	Sherpa_Khumbu	2e-06	0.009	25606	25605	497967
Mbuti	Tanshishan	Chokhopani	Sherpa_Khumbu	-0.00023	-0.592	10447	10494	206489
Mbuti	Thai	Chokhopani	Sherpa_Khumbu	-6e-06	-0.024	25521	25524	498921
Mbuti	Tibetan_Chamdo	Chokhopani	Sherpa_Khumbu	0.000802	3.308	26015	25616	497967
Mbuti	Tibetan_Gangcha	Chokhopani	Sherpa_Khumbu	0.000558	2.426	25887	25609	497967
Mbuti	Tibetan_Gannan	Chokhopani	Sherpa_Khumbu	0.000352	1.415	25776	25600	497967
Mbuti	Tibetan_Lhasa	Chokhopani	Sherpa_Khumbu	0.000812	3.25	26045	25641	497967
Mbuti	Tibetan_Nagqu	Chokhopani	Sherpa_Khumbu	0.00087	3.488	26036	25603	497967
Mbuti	Tibetan_Shannan	Chokhopani	Sherpa_Khumbu	0.000633	2.558	25993	25677	497967
Mbuti	Tibetan_Shigatse	Chokhopani	Sherpa_Khumbu	0.000774	3.148	26016	25630	497967
Mbuti	Tibetan_Xinlong	Chokhopani	Sherpa_Khumbu	0.000686	2.842	25970	25628	497967
Mbuti	Tibetan_Xunhua	Chokhopani	Sherpa_Khumbu	0.000681	2.59	25942	25603	497967
Mbuti	Tibetan_Yajiang	Chokhopani	Sherpa_Khumbu	0.000706	2.921	25967	25615	497967
Mbuti	Tibetan_Yunnan	Chokhopani	Sherpa_Khumbu	0.000512	1.922	25957	25702	497967
Mbuti	Tsum.LC	Chokhopani	Sherpa_Khumbu	0.00042	1.662	25961	25751	498921
Mbuti	Tu	Chokhopani	Sherpa_Khumbu	0.000493	2.14	25850	25604	498921
Mbuti	Tujia	Chokhopani	Sherpa_Khumbu	0.000114	0.479	25838	25781	498921
Mbuti	Ulchi	Chokhopani	Sherpa_Khumbu	0.000324	1.351	25808	25646	498921
Mbuti	UpperMustang	Chokhopani	Sherpa_Khumbu	0.000295	1.164	25896	25748	498921
Mbuti	UpperMustang.LC	Chokhopani	Sherpa_Khumbu	0.000527	2.167	25954	25691	498921
Mbuti	Upper_YR_IA	Chokhopani	Sherpa_Khumbu	0.000226	0.769	25118	25009	484380
Mbuti	Upper_YR_LN	Chokhopani	Sherpa_Khumbu	0.000119	0.427	25828	25769	496780
Mbuti	WLR_BA	Chokhopani	Sherpa_Khumbu	0.000767	2.046	14662	14445	282523
Mbuti	WLR_BA_o	Chokhopani	Sherpa_Khumbu	6.1e-05	0.158	18254	18232	354857
Mbuti	WLR_LN	Chokhopani	Sherpa_Khumbu	-0.000169	-0.533	21962	22034	427603
Mbuti	WLR_MN	Chokhopani	Sherpa_Khumbu	0.000452	1.371	25804	25580	496356
Mbuti	Xiaogao	Chokhopani	Sherpa_Khumbu	-0.000233	-0.626	22312	22413	432243
Mbuti	Xiaojingshan	Chokhopani	Sherpa_Khumbu	-0.000449	-1.323	14434	14561	283303
Mbuti	Xibo	Chokhopani	Sherpa_Khumbu	0.000471	1.928	25823	25588	498921
Mbuti	Xitoucun	Chokhopani	Sherpa_Khumbu	-0.001011	-2.929	14065	14348	279956
Mbuti	Yi	Chokhopani	Sherpa_Khumbu	0.000234	0.971	25898	25781	498921
Mbuti	YR_LBIA	Chokhopani	Sherpa_Khumbu	0.000162	0.611	25714	25633	497005
Mbuti	YR_LN	Chokhopani	Sherpa_Khumbu	7.3e-05	0.288	25853	25817	498819
Mbuti	YR_MN	Chokhopani	Sherpa_Khumbu	0.000163	0.569	25759	25678	497031
Mbuti	Yumin	Chokhopani	Sherpa_Khumbu	0.000244	0.627	21296	21195	413944
Mbuti	Ami	Chokhopani	Sherpa_Khumbu.LC	8e-05	0.321	25725	25685	498921
Mbuti	AR_EN	Chokhopani	Sherpa_Khumbu.LC	-0.00067	-1.503	8644	8758	170121
Mbuti	AR_IA	Chokhopani	Sherpa_Khumbu.LC	0.000131	0.134	1389	1385	27444
Mbuti	AR_Xianbei_IA	Chokhopani	Sherpa_Khumbu.LC	7.9e-05	0.176	8292	8279	161605
Mbuti	Atayal	Chokhopani	Sherpa_Khumbu.LC	-6.1e-05	-0.246	25656	25687	498921
Mbuti	Bianbian	Chokhopani	Sherpa_Khumbu.LC	-1.5e-05	-0.038	17535	17540	342438
Mbuti	Borneo	Chokhopani	Sherpa_Khumbu.LC	0.000115	0.468	25578	25520	498921
Mbuti	Boshan	Chokhopani	Sherpa_Khumbu.LC	0.000134	0.355	23594	23533	459890
Mbuti	Cambodian	Chokhopani	Sherpa_Khumbu.LC	6.6e-05	0.288	25510	25477	498921
Mbuti	Chuanyun	Chokhopani	Sherpa_Khumbu.LC	-0.00045	-0.988	8433	8507	165199
Mbuti	Dai	Chokhopani	Sherpa_Khumbu.LC	0.000135	0.551	25703	25636	498921
Mbuti	Daur	Chokhopani	Sherpa_Khumbu.LC	0.000432	1.797	25782	25566	498921
Mbuti	DevilsCave_N	Chokhopani	Sherpa_Khumbu.LC	4.7e-05	0.149	25776	25753	498503
Mbuti	Dungan	Chokhopani	Sherpa_Khumbu.LC	0.000429	1.885	25666	25453	496435
Mbuti	Gurung	Chokhopani	Sherpa_Khumbu.LC	-0.000163	-0.656	25594	25675	497967
Mbuti	Han	Chokhopani	Sherpa_Khumbu.LC	0.000227	0.968	25808	25694	498921
Mbuti	HanNorth	Chokhopani	Sherpa_Khumbu.LC	0.000185	0.78	25770	25678	498921
Mbuti	Hezhen	Chokhopani	Sherpa_Khumbu.LC	0.000235	0.97	25755	25638	498921
Mbuti	HMMH_MN	Chokhopani	Sherpa_Khumbu.LC	0.000165	0.422	15497	15447	302357
Mbuti	Japanese	Chokhopani	Sherpa_Khumbu.LC	0.000415	1.773	25834	25627	498921
Mbuti	Kinh	Chokhopani	Sherpa_Khumbu.LC	0.000183	0.756	25711	25619	498921
Mbuti	Korean	Chokhopani	Sherpa_Khumbu.LC	0.000215	0.837	25837	25729	498920
Mbuti	Kyang	Chokhopani	Sherpa_Khumbu.LC	-0.000381	-1.415	25772	25962	498921
Mbuti	Lahu	Chokhopani	Sherpa_Khumbu.LC	0.000277	1.129	25755	25617	498921
Mbuti	Liangdao1	Chokhopani	Sherpa_Khumbu.LC	-0.00059	-1.467	11263	11396	225414
Mbuti	Liangdao2	Chokhopani	Sherpa_Khumbu.LC	-0.000733	-2.037	21416	21727	423434
Mbuti	Lubrak	Chokhopani	Sherpa_Khumbu.LC	-0.000791	-2.043	16786	17045	327415
Mbuti	McColl_SEA_GR1	Chokhopani	Sherpa_Khumbu.LC	-0.000208	-0.491	8315	8351	171969
Mbuti	McColl_SEA_GR2	Chokhopani	Sherpa_Khumbu.LC	-0.000209	-0.703	23593	23691	467001
Mbuti	McColl_SEA_GR3	Chokhopani	Sherpa_Khumbu.LC	-0.000852	-2.13	7361	7496	157980
Mbuti	McColl_SEA_GR31	Chokhopani	Sherpa_Khumbu.LC	0.000571	1.103	5839	5775	113260
Mbuti	McColl_SEA_GR4	Chokhopani	Sherpa_Khumbu.LC	2e-06	0.007	12240	12239	245523
Mbuti	McColl_SEA_GR41	Chokhopani	Sherpa_Khumbu.LC	-0.000452	-0.659	2859	2885	58174
Mbuti	McColl_SEA_GR5	Chokhopani	Sherpa_Khumbu.LC	0.001754	2.456	2733	2639	53761
Mbuti	McColl_SEA_GR6	Chokhopani	Sherpa_Khumbu.LC	0.000567	1.473	11264	11139	221300
Mbuti	Mebrak	Chokhopani	Sherpa_Khumbu.LC	-0.00117	-4.138	25610	26194	498918
Mbuti	Miao	Chokhopani	Sherpa_Khumbu.LC	0.000297	1.2	25828	25680	498921
Mbuti	Miaozigou_MN	Chokhopani	Sherpa_Khumbu.LC	0.000751	1.659	7929	7814	153254
Mbuti	Mongola	Chokhopani	Sherpa_Khumbu.LC	0.000433	1.814	25782	25566	498921
Mbuti	Naga	Chokhopani	Sherpa_Khumbu.LC	0.000406	1.675	25874	25672	498921
Mbuti	Nanai	Chokhopani	Sherpa_Khumbu.LC	0.000347	1.41	25760	25588	496435
Mbuti	Naxi	Chokhopani	Sherpa_Khumbu.LC	0.000286	1.2	25826	25683	498921
Mbuti	Negidal	Chokhopani	Sherpa_Khumbu.LC	0.00026	0.915	25727	25598	496435
Mbuti	Nivh	Chokhopani	Sherpa_Khumbu.LC	0.000404	1.57	25718	25518	496435
Mbuti	Nubri.LC	Chokhopani	Sherpa_Khumbu.LC	0.000345	1.292	25861	25689	498921
Mbuti	Nyshi	Chokhopani	Sherpa_Khumbu.LC	6.4e-05	0.242	25791	25759	498921
Mbuti	Oroqen	Chokhopani	Sherpa_Khumbu.LC	0.000251	1.028	25763	25638	498921
Mbuti	Qiang_Danba	Chokhopani	Sherpa_Khumbu.LC	0.000527	2.162	25927	25665	497967
Mbuti	Qiang_Daofu	Chokhopani	Sherpa_Khumbu.LC	0.00056	2.309	25932	25653	497967
Mbuti	Qihe	Chokhopani	Sherpa_Khumbu.LC	-0.001125	-2.545	8497	8691	171553
Mbuti	Rhirhi	Chokhopani	Sherpa_Khumbu.LC	-0.001474	-4.441	25021	25740	488031
Mbuti	Samdzong	Chokhopani	Sherpa_Khumbu.LC	-0.000967	-3.642	25637	26120	498919
Mbuti	Semende	Chokhopani	Sherpa_Khumbu.LC	0.000251	1.029	25659	25534	498921
Mbuti	She	Chokhopani	Sherpa_Khumbu.LC	0.000119	0.493	25793	25733	498921
Mbuti	Sherpa_Khumbu	Chokhopani	Sherpa_Khumbu.LC	0.006214	24.418	27545	24445	498921
Mbuti	Sherpa_Nakatsuka	Chokhopani	Sherpa_Khumbu.LC	0.001421	5.215	26020	25311	498921
Mbuti	Sherpa_Wang	Chokhopani	Sherpa_Khumbu.LC	0.002368	8.944	26430	25251	497967
Mbuti	Shimao_LN	Chokhopani	Sherpa_Khumbu.LC	0.000418	1.333	25666	25459	494608
Mbuti	Suila	Chokhopani	Sherpa_Khumbu.LC	-0.001384	-3.343	16509	16958	323938
Mbuti	Suogang	Chokhopani	Sherpa_Khumbu.LC	-0.000322	-0.441	1983	1996	40118
Mbuti	Tamang	Chokhopani	Sherpa_Khumbu.LC	-9.4e-05	-0.402	25530	25577	497967
Mbuti	Tanshishan	Chokhopani	Sherpa_Khumbu.LC	-0.000521	-1.312	10401	10508	206489
Mbuti	Thai	Chokhopani	Sherpa_Khumbu.LC	7.9e-05	0.332	25498	25459	498921
Mbuti	Tibetan_Chamdo	Chokhopani	Sherpa_Khumbu.LC	0.000774	3.198	25963	25578	497967
Mbuti	Tibetan_Gangcha	Chokhopani	Sherpa_Khumbu.LC	0.000531	2.311	25830	25565	497967
Mbuti	Tibetan_Gannan	Chokhopani	Sherpa_Khumbu.LC	0.000125	0.51	25660	25598	497967
Mbuti	Tibetan_Lhasa	Chokhopani	Sherpa_Khumbu.LC	0.000808	3.233	25988	25586	497967
Mbuti	Tibetan_Nagqu	Chokhopani	Sherpa_Khumbu.LC	0.000842	3.305	25979	25559	497967
Mbuti	Tibetan_Shannan	Chokhopani	Sherpa_Khumbu.LC	0.000677	2.719	25953	25616	497967
Mbuti	Tibetan_Shigatse	Chokhopani	Sherpa_Khumbu.LC	0.000778	3.17	25969	25582	497967
Mbuti	Tibetan_Xinlong	Chokhopani	Sherpa_Khumbu.LC	0.000716	3.013	25923	25566	497967
Mbuti	Tibetan_Xunhua	Chokhopani	Sherpa_Khumbu.LC	0.000686	2.688	25891	25550	497967
Mbuti	Tibetan_Yajiang	Chokhopani	Sherpa_Khumbu.LC	0.000712	2.902	25923	25568	497967
Mbuti	Tibetan_Yunnan	Chokhopani	Sherpa_Khumbu.LC	0.000438	1.635	25891	25673	497967
Mbuti	Tsum.LC	Chokhopani	Sherpa_Khumbu.LC	0.000363	1.423	25894	25712	498921
Mbuti	Tu	Chokhopani	Sherpa_Khumbu.LC	0.000407	1.763	25784	25581	498921
Mbuti	Tujia	Chokhopani	Sherpa_Khumbu.LC	0.000232	0.975	25820	25704	498921
Mbuti	Ulchi	Chokhopani	Sherpa_Khumbu.LC	0.000287	1.195	25745	25601	498921
Mbuti	UpperMustang	Chokhopani	Sherpa_Khumbu.LC	0.000259	1.042	25835	25705	498921
Mbuti	UpperMustang.LC	Chokhopani	Sherpa_Khumbu.LC	0.000615	2.557	25924	25617	498921
Mbuti	Upper_YR_IA	Chokhopani	Sherpa_Khumbu.LC	0.000247	0.829	25080	24960	484380
Mbuti	Upper_YR_LN	Chokhopani	Sherpa_Khumbu.LC	0.000284	1.026	25829	25688	496780
Mbuti	WLR_BA	Chokhopani	Sherpa_Khumbu.LC	0.000767	2.043	14638	14422	282523
Mbuti	WLR_BA_o	Chokhopani	Sherpa_Khumbu.LC	-2.9e-05	-0.072	18197	18208	354857
Mbuti	WLR_LN	Chokhopani	Sherpa_Khumbu.LC	-0.000112	-0.345	21933	21981	427603
Mbuti	WLR_MN	Chokhopani	Sherpa_Khumbu.LC	0.000459	1.421	25758	25530	496356
Mbuti	Xiaogao	Chokhopani	Sherpa_Khumbu.LC	-0.000441	-1.183	22222	22413	432243
Mbuti	Xiaojingshan	Chokhopani	Sherpa_Khumbu.LC	-0.00044	-1.302	14426	14551	283303
Mbuti	Xibo	Chokhopani	Sherpa_Khumbu.LC	0.000493	2.003	25779	25533	498921
Mbuti	Xitoucun	Chokhopani	Sherpa_Khumbu.LC	-0.001119	-3.245	14047	14360	279956
Mbuti	Yi	Chokhopani	Sherpa_Khumbu.LC	0.000205	0.865	25843	25741	498921
Mbuti	YR_LBIA	Chokhopani	Sherpa_Khumbu.LC	0.000168	0.638	25674	25591	497005
Mbuti	YR_LN	Chokhopani	Sherpa_Khumbu.LC	1.5e-05	0.057	25786	25779	498819
Mbuti	YR_MN	Chokhopani	Sherpa_Khumbu.LC	1.6e-05	0.057	25666	25658	497031
Mbuti	Yumin	Chokhopani	Sherpa_Khumbu.LC	0.000207	0.524	21264	21178	413944
Mbuti	Ami	Chokhopani	Nubri.LC	-7e-05	-0.274	25662	25697	498921
Mbuti	AR_EN	Chokhopani	Nubri.LC	-0.000753	-1.689	8624	8753	170121
Mbuti	AR_IA	Chokhopani	Nubri.LC	0.000221	0.221	1392	1386	27444
Mbuti	AR_Xianbei_IA	Chokhopani	Nubri.LC	-0.000185	-0.413	8274	8304	161605
Mbuti	Atayal	Chokhopani	Nubri.LC	-0.000292	-1.118	25592	25738	498921
Mbuti	Bianbian	Chokhopani	Nubri.LC	-0.000166	-0.411	17469	17526	342438
Mbuti	Borneo	Chokhopani	Nubri.LC	-0.000111	-0.439	25515	25570	498921
Mbuti	Boshan	Chokhopani	Nubri.LC	-0.000223	-0.575	23482	23585	459890
Mbuti	Cambodian	Chokhopani	Nubri.LC	8.4e-05	0.352	25510	25468	498921
Mbuti	Chuanyun	Chokhopani	Nubri.LC	-0.000355	-0.74	8455	8514	165199
Mbuti	Dai	Chokhopani	Nubri.LC	-6e-05	-0.246	25634	25664	498921
Mbuti	Daur	Chokhopani	Nubri.LC	0.00024	1.012	25726	25606	498921
Mbuti	DevilsCave_N	Chokhopani	Nubri.LC	-0.000541	-1.745	25615	25884	498503
Mbuti	Dungan	Chokhopani	Nubri.LC	0.000219	0.939	25599	25491	496435
Mbuti	Gurung	Chokhopani	Nubri.LC	-0.000369	-1.474	25537	25721	497967
Mbuti	Han	Chokhopani	Nubri.LC	2.5e-05	0.108	25740	25728	498921
Mbuti	HanNorth	Chokhopani	Nubri.LC	3.8e-05	0.159	25728	25709	498921
Mbuti	Hezhen	Chokhopani	Nubri.LC	8.3e-05	0.338	25709	25668	498921
Mbuti	HMMH_MN	Chokhopani	Nubri.LC	-4.3e-05	-0.108	15468	15481	302357
Mbuti	Japanese	Chokhopani	Nubri.LC	0.000156	0.678	25756	25678	498921
Mbuti	Kinh	Chokhopani	Nubri.LC	-2.1e-05	-0.088	25637	25647	498921
Mbuti	Korean	Chokhopani	Nubri.LC	7e-05	0.276	25774	25739	498920
Mbuti	Kyang	Chokhopani	Nubri.LC	-0.000344	-1.229	25788	25960	498921
Mbuti	Lahu	Chokhopani	Nubri.LC	-0.000112	-0.449	25642	25698	498921
Mbuti	Liangdao1	Chokhopani	Nubri.LC	-0.000887	-2.115	11235	11435	225414
Mbuti	Liangdao2	Chokhopani	Nubri.LC	-0.00091	-2.489	21357	21743	423434
Mbuti	Lubrak	Chokhopani	Nubri.LC	-0.001197	-2.989	16713	17105	327415
Mbuti	McColl_SEA_GR1	Chokhopani	Nubri.LC	-0.000269	-0.632	8328	8374	171969
Mbuti	McColl_SEA_GR2	Chokhopani	Nubri.LC	-0.000277	-0.933	23578	23707	467001
Mbuti	McColl_SEA_GR3	Chokhopani	Nubri.LC	-0.000838	-2.011	7368	7500	157980
Mbuti	McColl_SEA_GR31	Chokhopani	Nubri.LC	4.6e-05	0.088	5797	5792	113260
Mbuti	McColl_SEA_GR4	Chokhopani	Nubri.LC	-0.000371	-0.975	12201	12292	245523
Mbuti	McColl_SEA_GR41	Chokhopani	Nubri.LC	5.5e-05	0.08	2877	2874	58174
Mbuti	McColl_SEA_GR5	Chokhopani	Nubri.LC	0.000793	1.095	2684	2641	53761
Mbuti	McColl_SEA_GR6	Chokhopani	Nubri.LC	0.00052	1.287	11282	11167	221300
Mbuti	Mebrak	Chokhopani	Nubri.LC	-0.001214	-4.266	25596	26202	498918
Mbuti	Miao	Chokhopani	Nubri.LC	5.5e-05	0.219	25751	25724	498921
Mbuti	Miaozigou_MN	Chokhopani	Nubri.LC	0.00068	1.504	7935	7831	153254
Mbuti	Mongola	Chokhopani	Nubri.LC	0.000285	1.21	25732	25590	498921
Mbuti	Naga	Chokhopani	Nubri.LC	5.5e-05	0.226	25775	25747	498921
Mbuti	Nanai	Chokhopani	Nubri.LC	0.000206	0.84	25718	25616	496435
Mbuti	Naxi	Chokhopani	Nubri.LC	5.8e-05	0.238	25757	25728	498921
Mbuti	Negidal	Chokhopani	Nubri.LC	0.000226	0.775	25716	25604	496435
Mbuti	Nivh	Chokhopani	Nubri.LC	0.00034	1.312	25703	25534	496435
Mbuti	Nyshi	Chokhopani	Nubri.LC	-0.000153	-0.569	25724	25800	498921
Mbuti	Oroqen	Chokhopani	Nubri.LC	8e-05	0.328	25714	25675	498921
Mbuti	Qiang_Danba	Chokhopani	Nubri.LC	0.000221	0.913	25822	25712	497967
Mbuti	Qiang_Daofu	Chokhopani	Nubri.LC	0.000468	1.936	25898	25665	497967
Mbuti	Qihe	Chokhopani	Nubri.LC	-0.001365	-2.974	8468	8702	171553
Mbuti	Rhirhi	Chokhopani	Nubri.LC	-0.001398	-4.352	25031	25713	488031
Mbuti	Samdzong	Chokhopani	Nubri.LC	-0.001098	-3.939	25591	26139	498919
Mbuti	Semende	Chokhopani	Nubri.LC	-3e-05	-0.119	25572	25587	498921
Mbuti	She	Chokhopani	Nubri.LC	-4e-06	-0.016	25739	25741	498921
Mbuti	Sherpa_Khumbu	Chokhopani	Nubri.LC	0.000465	1.78	25907	25675	498921
Mbuti	Sherpa_Khumbu.LC	Chokhopani	Nubri.LC	0.000314	1.229	25861	25705	498921
Mbuti	Sherpa_Nakatsuka	Chokhopani	Nubri.LC	-0.000165	-0.594	25566	25649	498921
Mbuti	Sherpa_Wang	Chokhopani	Nubri.LC	0.000127	0.478	25795	25732	497967
Mbuti	Shimao_LN	Chokhopani	Nubri.LC	0.000255	0.795	25598	25472	494608
Mbuti	Suila	Chokhopani	Nubri.LC	-0.001621	-3.761	16467	16992	323938
Mbuti	Suogang	Chokhopani	Nubri.LC	-0.001022	-1.35	1960	2001	40118
Mbuti	Tamang	Chokhopani	Nubri.LC	-0.000201	-0.842	25493	25594	497967
Mbuti	Tanshishan	Chokhopani	Nubri.LC	-0.000857	-2.079	10360	10537	206489
Mbuti	Thai	Chokhopani	Nubri.LC	-0.000127	-0.538	25433	25496	498921
Mbuti	Tibetan_Chamdo	Chokhopani	Nubri.LC	0.000516	2.128	25887	25631	497967
Mbuti	Tibetan_Gangcha	Chokhopani	Nubri.LC	0.00035	1.525	25775	25601	497967
Mbuti	Tibetan_Gannan	Chokhopani	Nubri.LC	0.000134	0.555	25655	25588	497967
Mbuti	Tibetan_Lhasa	Chokhopani	Nubri.LC	0.00054	2.147	25914	25645	497967
Mbuti	Tibetan_Nagqu	Chokhopani	Nubri.LC	0.000649	2.585	25909	25586	497967
Mbuti	Tibetan_Shannan	Chokhopani	Nubri.LC	0.000532	2.133	25911	25647	497967
Mbuti	Tibetan_Shigatse	Chokhopani	Nubri.LC	0.000643	2.535	25931	25610	497967
Mbuti	Tibetan_Xinlong	Chokhopani	Nubri.LC	0.000544	2.257	25870	25599	497967
Mbuti	Tibetan_Xunhua	Chokhopani	Nubri.LC	0.000527	2.013	25848	25585	497967
Mbuti	Tibetan_Yajiang	Chokhopani	Nubri.LC	0.0005	2.038	25859	25610	497967
Mbuti	Tibetan_Yunnan	Chokhopani	Nubri.LC	0.000197	0.71	25816	25718	497967
Mbuti	Tsum.LC	Chokhopani	Nubri.LC	0.000634	2.448	25969	25653	498921
Mbuti	Tu	Chokhopani	Nubri.LC	0.000139	0.594	25699	25629	498921
Mbuti	Tujia	Chokhopani	Nubri.LC	8.1e-05	0.333	25766	25726	498921
Mbuti	Ulchi	Chokhopani	Nubri.LC	0.0002	0.829	25717	25617	498921
Mbuti	UpperMustang	Chokhopani	Nubri.LC	0.000698	2.701	25951	25602	498921
Mbuti	UpperMustang.LC	Chokhopani	Nubri.LC	0.000362	1.473	25853	25673	498921
Mbuti	Upper_YR_IA	Chokhopani	Nubri.LC	4.3e-05	0.144	25017	24996	484380
Mbuti	Upper_YR_LN	Chokhopani	Nubri.LC	-5.4e-05	-0.192	25720	25747	496780
Mbuti	WLR_BA	Chokhopani	Nubri.LC	0.000332	0.874	14546	14452	282523
Mbuti	WLR_BA_o	Chokhopani	Nubri.LC	-0.000422	-1.05	18118	18267	354857
Mbuti	WLR_LN	Chokhopani	Nubri.LC	-0.000309	-0.915	21911	22043	427603
Mbuti	WLR_MN	Chokhopani	Nubri.LC	9e-06	0.026	25633	25628	496356
Mbuti	Xiaogao	Chokhopani	Nubri.LC	-0.000655	-1.766	22144	22427	432243
Mbuti	Xiaojingshan	Chokhopani	Nubri.LC	-0.001096	-3.175	14322	14632	283303
Mbuti	Xibo	Chokhopani	Nubri.LC	0.00027	1.092	25705	25570	498921
Mbuti	Xitoucun	Chokhopani	Nubri.LC	-0.001336	-3.912	13998	14372	279956
Mbuti	Yi	Chokhopani	Nubri.LC	-3.7e-05	-0.154	25770	25789	498921
Mbuti	YR_LBIA	Chokhopani	Nubri.LC	0.000123	0.46	25640	25579	497005
Mbuti	YR_LN	Chokhopani	Nubri.LC	-3.8e-05	-0.144	25768	25787	498819
Mbuti	YR_MN	Chokhopani	Nubri.LC	-0.000192	-0.665	25612	25707	497031
Mbuti	Yumin	Chokhopani	Nubri.LC	-1.2e-05	-0.029	21193	21198	413944
Mbuti	Ami	Chokhopani	Tsum.LC	-3e-05	-0.124	25720	25735	498921
Mbuti	AR_EN	Chokhopani	Tsum.LC	-0.000805	-1.837	8617	8754	170121
Mbuti	AR_IA	Chokhopani	Tsum.LC	-0.000114	-0.117	1397	1401	27444
Mbuti	AR_Xianbei_IA	Chokhopani	Tsum.LC	-0.000285	-0.649	8274	8320	161605
Mbuti	Atayal	Chokhopani	Tsum.LC	-0.000258	-1.043	25632	25760	498921
Mbuti	Bianbian	Chokhopani	Tsum.LC	-0.000209	-0.531	17510	17581	342438
Mbuti	Borneo	Chokhopani	Tsum.LC	-4e-05	-0.168	25574	25594	498921
Mbuti	Boshan	Chokhopani	Tsum.LC	-0.000301	-0.849	23500	23639	459890
Mbuti	Cambodian	Chokhopani	Tsum.LC	2.1e-05	0.092	25535	25525	498921
Mbuti	Chuanyun	Chokhopani	Tsum.LC	-0.000834	-1.823	8406	8544	165199
Mbuti	Dai	Chokhopani	Tsum.LC	-6.5e-05	-0.269	25690	25722	498921
Mbuti	Daur	Chokhopani	Tsum.LC	1.1e-05	0.049	25703	25697	498921
Mbuti	DevilsCave_N	Chokhopani	Tsum.LC	-0.00053	-1.718	25651	25915	498503
Mbuti	Dungan	Chokhopani	Tsum.LC	0.000181	0.816	25630	25540	496435
Mbuti	Gurung	Chokhopani	Tsum.LC	-0.000269	-1.136	25592	25726	497967
Mbuti	Han	Chokhopani	Tsum.LC	-4e-06	-0.018	25773	25775	498921
Mbuti	HanNorth	Chokhopani	Tsum.LC	-6.4e-05	-0.28	25738	25770	498921
Mbuti	Hezhen	Chokhopani	Tsum.LC	-1.2e-05	-0.053	25724	25730	498921
Mbuti	HMMH_MN	Chokhopani	Tsum.LC	-0.000348	-0.926	15438	15543	302357
Mbuti	Japanese	Chokhopani	Tsum.LC	0.000144	0.635	25796	25723	498921
Mbuti	Kinh	Chokhopani	Tsum.LC	-6e-06	-0.025	25683	25686	498921
Mbuti	Korean	Chokhopani	Tsum.LC	-3.1e-05	-0.126	25793	25809	498920
Mbuti	Kyang	Chokhopani	Tsum.LC	-0.000504	-1.898	25773	26024	498921
Mbuti	Lahu	Chokhopani	Tsum.LC	3.8e-05	0.157	25723	25704	498921
Mbuti	Liangdao1	Chokhopani	Tsum.LC	-0.0008	-2.027	11260	11440	225414
Mbuti	Liangdao2	Chokhopani	Tsum.LC	-0.000956	-2.757	21386	21791	423434
Mbuti	Lubrak	Chokhopani	Tsum.LC	-0.000875	-2.196	16816	17102	327415
Mbuti	McColl_SEA_GR1	Chokhopani	Tsum.LC	-0.000118	-0.292	8348	8368	171969
Mbuti	McColl_SEA_GR2	Chokhopani	Tsum.LC	-0.000309	-1.056	23592	23736	467001
Mbuti	McColl_SEA_GR3	Chokhopani	Tsum.LC	-0.001046	-2.599	7360	7526	157980
Mbuti	McColl_SEA_GR31	Chokhopani	Tsum.LC	0.000288	0.557	5822	5790	113260
Mbuti	McColl_SEA_GR4	Chokhopani	Tsum.LC	-0.000599	-1.654	12182	12329	245523
Mbuti	McColl_SEA_GR41	Chokhopani	Tsum.LC	-0.000475	-0.722	2868	2895	58174
Mbuti	McColl_SEA_GR5	Chokhopani	Tsum.LC	0.001684	2.375	2727	2637	53761
Mbuti	McColl_SEA_GR6	Chokhopani	Tsum.LC	0.000372	0.974	11264	11182	221300
Mbuti	Mebrak	Chokhopani	Tsum.LC	-0.001186	-4.381	25645	26237	498918
Mbuti	Miao	Chokhopani	Tsum.LC	7.2e-05	0.301	25802	25766	498921
Mbuti	Miaozigou_MN	Chokhopani	Tsum.LC	0	0	7873	7873	153254
Mbuti	Mongola	Chokhopani	Tsum.LC	7.4e-05	0.316	25714	25677	498921
Mbuti	Naga	Chokhopani	Tsum.LC	6.6e-05	0.274	25819	25786	498921
Mbuti	Nanai	Chokhopani	Tsum.LC	-1e-05	-0.044	25690	25695	496435
Mbuti	Naxi	Chokhopani	Tsum.LC	2.1e-05	0.09	25787	25777	498921
Mbuti	Negidal	Chokhopani	Tsum.LC	-0.000174	-0.652	25646	25733	496435
Mbuti	Nivh	Chokhopani	Tsum.LC	0.000116	0.452	25682	25624	496435
Mbuti	Nubri.LC	Chokhopani	Tsum.LC	0.000606	2.396	25969	25667	498921
Mbuti	Nyshi	Chokhopani	Tsum.LC	-0.000173	-0.662	25768	25855	498921
Mbuti	Oroqen	Chokhopani	Tsum.LC	-6.2e-05	-0.264	25713	25744	498921
Mbuti	Qiang_Danba	Chokhopani	Tsum.LC	0.000217	0.919	25861	25753	497967
Mbuti	Qiang_Daofu	Chokhopani	Tsum.LC	0.000257	1.097	25878	25750	497967
Mbuti	Qihe	Chokhopani	Tsum.LC	-0.000935	-2.093	8522	8682	171553
Mbuti	Rhirhi	Chokhopani	Tsum.LC	-0.001465	-4.65	25063	25778	488031
Mbuti	Samdzong	Chokhopani	Tsum.LC	-0.001001	-3.856	25664	26164	498919
Mbuti	Semende	Chokhopani	Tsum.LC	7.5e-05	0.314	25649	25612	498921
Mbuti	She	Chokhopani	Tsum.LC	-2.2e-05	-0.092	25783	25794	498921
Mbuti	Sherpa_Khumbu	Chokhopani	Tsum.LC	0.000503	2.072	25961	25710	498921
Mbuti	Sherpa_Khumbu.LC	Chokhopani	Tsum.LC	0.000304	1.252	25894	25742	498921
Mbuti	Sherpa_Nakatsuka	Chokhopani	Tsum.LC	-0.000141	-0.525	25607	25677	498921
Mbuti	Sherpa_Wang	Chokhopani	Tsum.LC	6.3e-05	0.248	25812	25781	497967
Mbuti	Shimao_LN	Chokhopani	Tsum.LC	-5.8e-05	-0.187	25572	25601	494608
Mbuti	Suila	Chokhopani	Tsum.LC	-0.001166	-2.838	16582	16959	323938
Mbuti	Suogang	Chokhopani	Tsum.LC	-0.00126	-1.712	1960	2011	40118
Mbuti	Tamang	Chokhopani	Tsum.LC	-0.000152	-0.67	25553	25629	497967
Mbuti	Tanshishan	Chokhopani	Tsum.LC	-0.000733	-1.841	10393	10544	206489
Mbuti	Thai	Chokhopani	Tsum.LC	-2.8e-05	-0.122	25501	25515	498921
Mbuti	Tibetan_Chamdo	Chokhopani	Tsum.LC	0.000383	1.669	25881	25690	497967
Mbuti	Tibetan_Gangcha	Chokhopani	Tsum.LC	0.000259	1.185	25786	25658	497967
Mbuti	Tibetan_Gannan	Chokhopani	Tsum.LC	7.2e-05	0.302	25680	25644	497967
Mbuti	Tibetan_Lhasa	Chokhopani	Tsum.LC	0.000537	2.232	25954	25687	497967
Mbuti	Tibetan_Nagqu	Chokhopani	Tsum.LC	0.000536	2.25	25923	25656	497967
Mbuti	Tibetan_Shannan	Chokhopani	Tsum.LC	0.00039	1.65	25906	25712	497967
Mbuti	Tibetan_Shigatse	Chokhopani	Tsum.LC	0.000455	1.914	25920	25693	497967
Mbuti	Tibetan_Xinlong	Chokhopani	Tsum.LC	0.000338	1.451	25855	25687	497967
Mbuti	Tibetan_Xunhua	Chokhopani	Tsum.LC	0.000566	2.254	25893	25611	497967
Mbuti	Tibetan_Yajiang	Chokhopani	Tsum.LC	0.000432	1.85	25880	25665	497967
Mbuti	Tibetan_Yunnan	Chokhopani	Tsum.LC	0.000293	1.116	25880	25734	497967
Mbuti	Tu	Chokhopani	Tsum.LC	0.000136	0.606	25738	25670	498921
Mbuti	Tujia	Chokhopani	Tsum.LC	-4.9e-05	-0.214	25778	25802	498921
Mbuti	Ulchi	Chokhopani	Tsum.LC	1.3e-05	0.054	25707	25700	498921
Mbuti	UpperMustang	Chokhopani	Tsum.LC	0.000761	3.095	26016	25637	498921
Mbuti	UpperMustang.LC	Chokhopani	Tsum.LC	0.000332	1.429	25884	25719	498921
Mbuti	Upper_YR_IA	Chokhopani	Tsum.LC	8e-05	0.286	25048	25010	484380
Mbuti	Upper_YR_LN	Chokhopani	Tsum.LC	-7.8e-05	-0.28	25755	25794	496780
Mbuti	WLR_BA	Chokhopani	Tsum.LC	-4.9e-05	-0.138	14538	14551	282523
Mbuti	WLR_BA_o	Chokhopani	Tsum.LC	-0.000527	-1.406	18138	18325	354857
Mbuti	WLR_LN	Chokhopani	Tsum.LC	-0.000315	-1.009	21957	22092	427603
Mbuti	WLR_MN	Chokhopani	Tsum.LC	0.000241	0.785	25718	25598	496356
Mbuti	Xiaogao	Chokhopani	Tsum.LC	-0.000714	-1.995	22176	22485	432243
Mbuti	Xiaojingshan	Chokhopani	Tsum.LC	-0.000817	-2.455	14380	14611	283303
Mbuti	Xibo	Chokhopani	Tsum.LC	9.8e-05	0.408	25695	25647	498921
Mbuti	Xitoucun	Chokhopani	Tsum.LC	-0.001382	-4.156	14018	14405	279956
Mbuti	Yi	Chokhopani	Tsum.LC	-2.1e-05	-0.09	25812	25822	498921
Mbuti	YR_LBIA	Chokhopani	Tsum.LC	-5.5e-05	-0.216	25635	25662	497005
Mbuti	YR_LN	Chokhopani	Tsum.LC	-0.00013	-0.513	25782	25846	498819
Mbuti	YR_MN	Chokhopani	Tsum.LC	-0.000104	-0.377	25664	25716	497031
Mbuti	Yumin	Chokhopani	Tsum.LC	-0.000118	-0.306	21210	21259	413944
Mbuti	Ami	Chokhopani	UpperMustang	-0.000279	-1.125	25685	25824	498921
Mbuti	AR_EN	Chokhopani	UpperMustang	-0.000773	-1.751	8654	8786	170121
Mbuti	AR_IA	Chokhopani	UpperMustang	-0.000528	-0.564	1382	1397	27444
Mbuti	AR_Xianbei_IA	Chokhopani	UpperMustang	-0.000108	-0.255	8295	8313	161605
Mbuti	Atayal	Chokhopani	UpperMustang	-0.00049	-1.883	25602	25846	498921
Mbuti	Bianbian	Chokhopani	UpperMustang	-0.000102	-0.257	17522	17557	342438
Mbuti	Borneo	Chokhopani	UpperMustang	-0.000174	-0.722	25565	25652	498921
Mbuti	Boshan	Chokhopani	UpperMustang	-0.000155	-0.423	23567	23638	459890
Mbuti	Cambodian	Chokhopani	UpperMustang	-0.000191	-0.838	25505	25600	498921
Mbuti	Chuanyun	Chokhopani	UpperMustang	-0.000397	-0.884	8443	8509	165199
Mbuti	Dai	Chokhopani	UpperMustang	-0.000236	-0.982	25664	25782	498921
Mbuti	Daur	Chokhopani	UpperMustang	6.7e-05	0.286	25743	25709	498921
Mbuti	DevilsCave_N	Chokhopani	UpperMustang	-0.000472	-1.597	25700	25935	498503
Mbuti	Dungan	Chokhopani	UpperMustang	5.5e-05	0.243	25627	25600	496435
Mbuti	Gurung	Chokhopani	UpperMustang	-0.000414	-1.706	25581	25787	497967
Mbuti	Han	Chokhopani	UpperMustang	-0.000174	-0.764	25754	25841	498921
Mbuti	HanNorth	Chokhopani	UpperMustang	-0.000185	-0.8	25729	25821	498921
Mbuti	Hezhen	Chokhopani	UpperMustang	-0.00015	-0.639	25709	25783	498921
Mbuti	HMMH_MN	Chokhopani	UpperMustang	-0.000339	-0.883	15465	15568	302357
Mbuti	Japanese	Chokhopani	UpperMustang	3.6e-05	0.157	25793	25775	498921
Mbuti	Kinh	Chokhopani	UpperMustang	-0.000279	-1.162	25640	25779	498921
Mbuti	Korean	Chokhopani	UpperMustang	-2e-05	-0.081	25823	25833	498920
Mbuti	Kyang	Chokhopani	UpperMustang	-0.000718	-2.729	25751	26109	498921
Mbuti	Lahu	Chokhopani	UpperMustang	-0.00023	-0.949	25674	25788	498921
Mbuti	Liangdao1	Chokhopani	UpperMustang	-0.001073	-2.685	11232	11474	225414
Mbuti	Liangdao2	Chokhopani	UpperMustang	-0.000829	-2.316	21423	21774	423434
Mbuti	Lubrak	Chokhopani	UpperMustang	-0.001211	-3.126	16750	17147	327415
Mbuti	McColl_SEA_GR1	Chokhopani	UpperMustang	-0.000491	-1.233	8302	8386	171969
Mbuti	McColl_SEA_GR2	Chokhopani	UpperMustang	-0.000313	-1.079	23610	23756	467001
Mbuti	McColl_SEA_GR3	Chokhopani	UpperMustang	-0.001221	-3.127	7340	7532	157980
Mbuti	McColl_SEA_GR31	Chokhopani	UpperMustang	0.000138	0.272	5806	5790	113260
Mbuti	McColl_SEA_GR4	Chokhopani	UpperMustang	-0.000481	-1.354	12200	12318	245523
Mbuti	McColl_SEA_GR41	Chokhopani	UpperMustang	-0.000284	-0.443	2869	2886	58174
Mbuti	McColl_SEA_GR5	Chokhopani	UpperMustang	0.001121	1.627	2719	2659	53761
Mbuti	McColl_SEA_GR6	Chokhopani	UpperMustang	-0.000122	-0.316	11219	11246	221300
Mbuti	Mebrak	Chokhopani	UpperMustang	-0.001223	-4.508	25664	26275	498918
Mbuti	Miao	Chokhopani	UpperMustang	-0.0001	-0.412	25780	25829	498921
Mbuti	Miaozigou_MN	Chokhopani	UpperMustang	-4.1e-05	-0.094	7899	7905	153254
Mbuti	Mongola	Chokhopani	UpperMustang	3.2e-05	0.138	25723	25707	498921
Mbuti	Naga	Chokhopani	UpperMustang	-0.0001	-0.416	25795	25845	498921
Mbuti	Nanai	Chokhopani	UpperMustang	9e-05	0.379	25740	25696	496435
Mbuti	Naxi	Chokhopani	UpperMustang	-7.8e-05	-0.336	25787	25826	498921
Mbuti	Negidal	Chokhopani	UpperMustang	-5.4e-05	-0.199	25708	25735	496435
Mbuti	Nivh	Chokhopani	UpperMustang	0.000237	0.945	25739	25622	496435
Mbuti	Nubri.LC	Chokhopani	UpperMustang	0.000481	1.878	25951	25711	498921
Mbuti	Nyshi	Chokhopani	UpperMustang	-0.000229	-0.884	25768	25882	498921
Mbuti	Oroqen	Chokhopani	UpperMustang	-0.000108	-0.454	25729	25782	498921
Mbuti	Qiang_Danba	Chokhopani	UpperMustang	5.5e-05	0.235	25845	25817	497967
Mbuti	Qiang_Daofu	Chokhopani	UpperMustang	0.000157	0.671	25876	25798	497967
Mbuti	Qihe	Chokhopani	UpperMustang	-0.001186	-2.777	8478	8681	171553
Mbuti	Rhirhi	Chokhopani	UpperMustang	-0.001709	-5.47	25016	25850	488031
Mbuti	Samdzong	Chokhopani	UpperMustang	-0.001199	-4.583	25631	26229	498919
Mbuti	Semende	Chokhopani	UpperMustang	-9.4e-05	-0.383	25627	25674	498921
Mbuti	She	Chokhopani	UpperMustang	-0.000177	-0.731	25763	25852	498921
Mbuti	Sherpa_Khumbu	Chokhopani	UpperMustang	0.000189	0.777	25896	25801	498921
Mbuti	Sherpa_Khumbu.LC	Chokhopani	UpperMustang	1e-05	0.044	25835	25830	498921
Mbuti	Sherpa_Nakatsuka	Chokhopani	UpperMustang	-0.000191	-0.735	25606	25701	498921
Mbuti	Sherpa_Wang	Chokhopani	UpperMustang	6.6e-05	0.263	25849	25816	497967
Mbuti	Shimao_LN	Chokhopani	UpperMustang	-0.000228	-0.752	25549	25662	494608
Mbuti	Suila	Chokhopani	UpperMustang	-0.001031	-2.449	16601	16935	323938
Mbuti	Suogang	Chokhopani	UpperMustang	-0.001129	-1.598	1967	2012	40118
Mbuti	Tamang	Chokhopani	UpperMustang	-0.000259	-1.132	25545	25674	497967
Mbuti	Tanshishan	Chokhopani	UpperMustang	-0.000604	-1.6	10409	10534	206489
Mbuti	Thai	Chokhopani	UpperMustang	-0.000253	-1.133	25463	25590	498921
Mbuti	Tibetan_Chamdo	Chokhopani	UpperMustang	0.000153	0.668	25844	25767	497967
Mbuti	Tibetan_Gangcha	Chokhopani	UpperMustang	9.4e-05	0.423	25770	25723	497967
Mbuti	Tibetan_Gannan	Chokhopani	UpperMustang	-0.000147	-0.615	25647	25720	497967
Mbuti	Tibetan_Lhasa	Chokhopani	UpperMustang	0.000341	1.414	25925	25755	497967
Mbuti	Tibetan_Nagqu	Chokhopani	UpperMustang	0.000288	1.186	25875	25732	497967
Mbuti	Tibetan_Shannan	Chokhopani	UpperMustang	0.000189	0.801	25880	25786	497967
Mbuti	Tibetan_Shigatse	Chokhopani	UpperMustang	0.000297	1.245	25894	25746	497967
Mbuti	Tibetan_Xinlong	Chokhopani	UpperMustang	0.000166	0.709	25836	25753	497967
Mbuti	Tibetan_Xunhua	Chokhopani	UpperMustang	0.000301	1.21	25852	25702	497967
Mbuti	Tibetan_Yajiang	Chokhopani	UpperMustang	0.000218	0.91	25847	25739	497967
Mbuti	Tibetan_Yunnan	Chokhopani	UpperMustang	0.000162	0.622	25876	25795	497967
Mbuti	Tsum.LC	Chokhopani	UpperMustang	0.000572	2.302	26016	25731	498921
Mbuti	Tu	Chokhopani	UpperMustang	-5.8e-05	-0.26	25712	25741	498921
Mbuti	Tujia	Chokhopani	UpperMustang	-0.000286	-1.234	25735	25878	498921
Mbuti	Ulchi	Chokhopani	UpperMustang	4e-05	0.168	25743	25723	498921
Mbuti	UpperMustang.LC	Chokhopani	UpperMustang	0.000815	3.427	26049	25642	498921
Mbuti	Upper_YR_IA	Chokhopani	UpperMustang	-0.000184	-0.641	25013	25101	484380
Mbuti	Upper_YR_LN	Chokhopani	UpperMustang	-0.000211	-0.781	25756	25861	496780
Mbuti	WLR_BA	Chokhopani	UpperMustang	0.000426	1.151	14617	14497	282523
Mbuti	WLR_BA_o	Chokhopani	UpperMustang	-0.000468	-1.213	18190	18356	354857
Mbuti	WLR_LN	Chokhopani	UpperMustang	-0.000751	-2.353	21854	22175	427603
Mbuti	WLR_MN	Chokhopani	UpperMustang	0.000141	0.455	25727	25658	496356
Mbuti	Xiaogao	Chokhopani	UpperMustang	-0.001067	-2.993	22109	22570	432243
Mbuti	Xiaojingshan	Chokhopani	UpperMustang	-0.000773	-2.415	14386	14605	283303
Mbuti	Xibo	Chokhopani	UpperMustang	6e-05	0.256	25717	25687	498921
Mbuti	Xitoucun	Chokhopani	UpperMustang	-0.001552	-4.653	14006	14440	279956
Mbuti	Yi	Chokhopani	UpperMustang	-0.000196	-0.844	25792	25890	498921
Mbuti	YR_LBIA	Chokhopani	UpperMustang	-0.000147	-0.553	25633	25706	497005
Mbuti	YR_LN	Chokhopani	UpperMustang	-0.000346	-1.382	25749	25922	498819
Mbuti	YR_MN	Chokhopani	UpperMustang	-0.000164	-0.583	25683	25764	497031
Mbuti	Yumin	Chokhopani	UpperMustang	-0.000421	-1.153	21158	21332	413944
Mbuti	Ami	Chokhopani	UpperMustang.LC	3.6e-05	0.146	25772	25754	498921
Mbuti	AR_EN	Chokhopani	UpperMustang.LC	-0.000764	-1.779	8634	8764	170121
Mbuti	AR_IA	Chokhopani	UpperMustang.LC	-0.000258	-0.276	1393	1400	27444
Mbuti	AR_Xianbei_IA	Chokhopani	UpperMustang.LC	8.1e-05	0.191	8317	8304	161605
Mbuti	Atayal	Chokhopani	UpperMustang.LC	-0.000193	-0.764	25695	25791	498921
Mbuti	Bianbian	Chokhopani	UpperMustang.LC	6e-06	0.016	17571	17569	342438
Mbuti	Borneo	Chokhopani	UpperMustang.LC	-0.000158	-0.639	25581	25659	498921
Mbuti	Boshan	Chokhopani	UpperMustang.LC	-1.8e-05	-0.051	23632	23641	459890
Mbuti	Cambodian	Chokhopani	UpperMustang.LC	-5.7e-05	-0.247	25550	25579	498921
Mbuti	Chuanyun	Chokhopani	UpperMustang.LC	-0.00036	-0.792	8453	8512	165199
Mbuti	Dai	Chokhopani	UpperMustang.LC	-0.00011	-0.457	25706	25761	498921
Mbuti	Daur	Chokhopani	UpperMustang.LC	0.000218	0.933	25792	25683	498921
Mbuti	DevilsCave_N	Chokhopani	UpperMustang.LC	-0.000404	-1.358	25727	25928	498503
Mbuti	Dungan	Chokhopani	UpperMustang.LC	8.9e-05	0.396	25641	25597	496435
Mbuti	Gurung	Chokhopani	UpperMustang.LC	-0.00055	-2.26	25554	25828	497967
Mbuti	Han	Chokhopani	UpperMustang.LC	2e-05	0.085	25816	25806	498921
Mbuti	HanNorth	Chokhopani	UpperMustang.LC	-3.7e-05	-0.159	25779	25798	498921
Mbuti	Hezhen	Chokhopani	UpperMustang.LC	2.4e-05	0.102	25763	25751	498921
Mbuti	HMMH_MN	Chokhopani	UpperMustang.LC	0.000109	0.283	15536	15503	302357
Mbuti	Japanese	Chokhopani	UpperMustang.LC	0.000174	0.752	25836	25749	498921
Mbuti	Kinh	Chokhopani	UpperMustang.LC	-2.8e-05	-0.118	25714	25728	498921
Mbuti	Korean	Chokhopani	UpperMustang.LC	-3e-06	-0.014	25841	25842	498920
Mbuti	Kyang	Chokhopani	UpperMustang.LC	-0.000746	-2.836	25739	26111	498921
Mbuti	Lahu	Chokhopani	UpperMustang.LC	-5.9e-05	-0.237	25732	25761	498921
Mbuti	Liangdao1	Chokhopani	UpperMustang.LC	-0.000839	-2.106	11267	11456	225414
Mbuti	Liangdao2	Chokhopani	UpperMustang.LC	-0.000708	-2.044	21464	21764	423434
Mbuti	Lubrak	Chokhopani	UpperMustang.LC	-0.001266	-3.288	16749	17164	327415
Mbuti	McColl_SEA_GR1	Chokhopani	UpperMustang.LC	-4.4e-05	-0.106	8365	8373	171969
Mbuti	McColl_SEA_GR2	Chokhopani	UpperMustang.LC	-0.0003	-1.053	23631	23771	467001
Mbuti	McColl_SEA_GR3	Chokhopani	UpperMustang.LC	-0.000966	-2.379	7386	7538	157980
Mbuti	McColl_SEA_GR31	Chokhopani	UpperMustang.LC	0.000412	0.842	5822	5776	113260
Mbuti	McColl_SEA_GR4	Chokhopani	UpperMustang.LC	-0.000281	-0.799	12235	12304	245523
Mbuti	McColl_SEA_GR41	Chokhopani	UpperMustang.LC	-0.00016	-0.254	2873	2882	58174
Mbuti	McColl_SEA_GR5	Chokhopani	UpperMustang.LC	0.001693	2.451	2731	2640	53761
Mbuti	McColl_SEA_GR6	Chokhopani	UpperMustang.LC	0.000461	1.197	11308	11207	221300
Mbuti	Mebrak	Chokhopani	UpperMustang.LC	-0.001401	-5.107	25617	26316	498918
Mbuti	Miao	Chokhopani	UpperMustang.LC	7.4e-05	0.301	25836	25799	498921
Mbuti	Miaozigou_MN	Chokhopani	UpperMustang.LC	0.000256	0.588	7916	7877	153254
Mbuti	Mongola	Chokhopani	UpperMustang.LC	0.000152	0.646	25770	25694	498921
Mbuti	Naga	Chokhopani	UpperMustang.LC	1.6e-05	0.064	25841	25833	498921
Mbuti	Nanai	Chokhopani	UpperMustang.LC	0.000201	0.846	25785	25685	496435
Mbuti	Naxi	Chokhopani	UpperMustang.LC	7.9e-05	0.334	25836	25796	498921
Mbuti	Negidal	Chokhopani	UpperMustang.LC	4.8e-05	0.171	25748	25724	496435
Mbuti	Nivh	Chokhopani	UpperMustang.LC	0.000348	1.37	25773	25601	496435
Mbuti	Nubri.LC	Chokhopani	UpperMustang.LC	9e-05	0.346	25853	25808	498921
Mbuti	Nyshi	Chokhopani	UpperMustang.LC	-0.000126	-0.492	25807	25870	498921
Mbuti	Oroqen	Chokhopani	UpperMustang.LC	9.7e-05	0.41	25797	25749	498921
Mbuti	Qiang_Danba	Chokhopani	UpperMustang.LC	0.000285	1.191	25920	25779	497967
Mbuti	Qiang_Daofu	Chokhopani	UpperMustang.LC	0.000346	1.475	25934	25762	497967
Mbuti	Qihe	Chokhopani	UpperMustang.LC	-0.00111	-2.551	8510	8700	171553
Mbuti	Rhirhi	Chokhopani	UpperMustang.LC	-0.001789	-5.776	25011	25884	488031
Mbuti	Samdzong	Chokhopani	UpperMustang.LC	-0.001221	-4.712	25620	26229	498919
Mbuti	Semende	Chokhopani	UpperMustang.LC	2.2e-05	0.091	25663	25652	498921
Mbuti	She	Chokhopani	UpperMustang.LC	4.5e-05	0.184	25841	25818	498921
Mbuti	Sherpa_Khumbu	Chokhopani	UpperMustang.LC	0.000367	1.479	25954	25771	498921
Mbuti	Sherpa_Khumbu.LC	Chokhopani	UpperMustang.LC	0.000312	1.267	25924	25768	498921
Mbuti	Sherpa_Nakatsuka	Chokhopani	UpperMustang.LC	-0.00022	-0.818	25617	25727	498921
Mbuti	Sherpa_Wang	Chokhopani	UpperMustang.LC	6.4e-05	0.25	25856	25824	497967
Mbuti	Shimao_LN	Chokhopani	UpperMustang.LC	8.2e-05	0.27	25641	25600	494608
Mbuti	Suila	Chokhopani	UpperMustang.LC	-0.001183	-2.905	16581	16964	323938
Mbuti	Suogang	Chokhopani	UpperMustang.LC	-0.000563	-0.799	1976	1999	40118
Mbuti	Tamang	Chokhopani	UpperMustang.LC	-0.000431	-1.877	25513	25728	497967
Mbuti	Tanshishan	Chokhopani	UpperMustang.LC	-0.000768	-2.001	10374	10533	206489
Mbuti	Thai	Chokhopani	UpperMustang.LC	-0.000234	-1.003	25486	25603	498921
Mbuti	Tibetan_Chamdo	Chokhopani	UpperMustang.LC	0.000416	1.761	25924	25716	497967
Mbuti	Tibetan_Gangcha	Chokhopani	UpperMustang.LC	0.000313	1.382	25834	25678	497967
Mbuti	Tibetan_Gannan	Chokhopani	UpperMustang.LC	5e-06	0.02	25694	25692	497967
Mbuti	Tibetan_Lhasa	Chokhopani	UpperMustang.LC	0.000492	2.021	25971	25726	497967
Mbuti	Tibetan_Nagqu	Chokhopani	UpperMustang.LC	0.000546	2.188	25956	25684	497967
Mbuti	Tibetan_Shannan	Chokhopani	UpperMustang.LC	0.000338	1.397	25928	25759	497967
Mbuti	Tibetan_Shigatse	Chokhopani	UpperMustang.LC	0.000559	2.347	25976	25698	497967
Mbuti	Tibetan_Xinlong	Chokhopani	UpperMustang.LC	0.000459	1.922	25923	25695	497967
Mbuti	Tibetan_Xunhua	Chokhopani	UpperMustang.LC	0.000419	1.626	25884	25675	497967
Mbuti	Tibetan_Yajiang	Chokhopani	UpperMustang.LC	0.000439	1.788	25912	25693	497967
Mbuti	Tibetan_Yunnan	Chokhopani	UpperMustang.LC	0.000305	1.157	25920	25768	497967
Mbuti	Tsum.LC	Chokhopani	UpperMustang.LC	8.8e-05	0.354	25884	25840	498921
Mbuti	Tu	Chokhopani	UpperMustang.LC	0.000123	0.537	25768	25706	498921
Mbuti	Tujia	Chokhopani	UpperMustang.LC	3.7e-05	0.156	25838	25820	498921
Mbuti	Ulchi	Chokhopani	UpperMustang.LC	0.000134	0.57	25773	25706	498921
Mbuti	UpperMustang	Chokhopani	UpperMustang.LC	0.00076	3.017	26049	25669	498921
Mbuti	Upper_YR_IA	Chokhopani	UpperMustang.LC	3.8e-05	0.136	25073	25055	484380
Mbuti	Upper_YR_LN	Chokhopani	UpperMustang.LC	-1.8e-05	-0.066	25806	25815	496780
Mbuti	WLR_BA	Chokhopani	UpperMustang.LC	0.00038	1.068	14615	14508	282523
Mbuti	WLR_BA_o	Chokhopani	UpperMustang.LC	-0.000473	-1.221	18179	18347	354857
Mbuti	WLR_LN	Chokhopani	UpperMustang.LC	-0.000452	-1.416	21932	22125	427603
Mbuti	WLR_MN	Chokhopani	UpperMustang.LC	0.000216	0.687	25736	25628	496356
Mbuti	Xiaogao	Chokhopani	UpperMustang.LC	-0.000859	-2.332	22164	22535	432243
Mbuti	Xiaojingshan	Chokhopani	UpperMustang.LC	-0.000792	-2.452	14398	14622	283303
Mbuti	Xibo	Chokhopani	UpperMustang.LC	0.000231	0.974	25767	25652	498921
Mbuti	Xitoucun	Chokhopani	UpperMustang.LC	-0.001248	-3.698	14057	14406	279956
Mbuti	Yi	Chokhopani	UpperMustang.LC	8e-06	0.033	25859	25855	498921
Mbuti	YR_LBIA	Chokhopani	UpperMustang.LC	-7e-05	-0.271	25668	25703	497005
Mbuti	YR_LN	Chokhopani	UpperMustang.LC	-0.000133	-0.533	25818	25884	498819
Mbuti	YR_MN	Chokhopani	UpperMustang.LC	-8.3e-05	-0.291	25713	25754	497031
Mbuti	Yumin	Chokhopani	UpperMustang.LC	0.000161	0.431	21299	21232	413944

## Sheet: SD9
Supplementary Data 9. QpAdm modeling of Himalayan populations from the Illumina dataset. We used qpAdm to test three-way admixture model, Tsum + Naga/YR_MN + Ref3(South Asian), on populations in Bhutan, Nepal, and Tibet reported in Arciero et al 2018. We use Lubrak as an extra outgroup on top of the six base outgroups. P-values are calculated with a likelihood ratio test comparing a nested model …
Country	Target	Ref2	Ref3	Pval	C1	C2	C3	SEM1	SEM2	SEM3
Nepal	Bahing	Naga	Pathan	0.151546	0.168	0.82	0.012	0.199	0.187	0.019
Nepal	Bahing	Naga	Sindhi	0.14956	0.171	0.817	0.011	0.2	0.187	0.019
Nepal	Bahing	Naga	Pulliyar	0.151257	0.188	0.802	0.011	0.203	0.185	0.027
Nepal	Bantawa	Naga	Pathan	0.149738	0.227	0.763	0.01	0.144	0.135	0.014
Nepal	Bantawa	Naga	Sindhi	0.154575	0.221	0.767	0.011	0.144	0.135	0.015
Nepal	Bantawa	Naga	Pulliyar	0.260553	0.172	0.8	0.028	0.138	0.127	0.02
Nepal	Baram	Naga	Pathan	0.00346252	0.031	0.82	0.149	0.102	0.095	0.011
Nepal	Baram	Naga	Sindhi	0.0118566	0.04	0.809	0.151	0.099	0.092	0.011
Nepal	Baram	Naga	Pulliyar	0.340147	0.105	0.688	0.207	0.088	0.081	0.014
India	Bodo	Naga	Pathan	6.2275e-09	-0.573	1.328	0.245	0.176	0.164	0.016
India	Bodo	Naga	Sindhi	1.64266e-07	-0.558	1.307	0.251	0.165	0.154	0.016
India	Bodo	Naga	Pulliyar	0.0747151	-0.193	0.875	0.318	0.096	0.087	0.014
Bhutan	Brokkat	Naga	Pathan	0.372112	0.66	0.346	-0.007	0.077	0.071	0.008
Bhutan	Brokkat	Naga	Sindhi	0.382341	0.663	0.345	-0.007	0.077	0.072	0.008
Bhutan	Brokkat	Naga	Pulliyar	0.555022	0.687	0.328	-0.015	0.077	0.07	0.011
Bhutan	Brokpa	Naga	Pathan	0.709893	0.448	0.534	0.018	0.075	0.07	0.008
Bhutan	Brokpa	Naga	Sindhi	0.718367	0.447	0.535	0.018	0.075	0.07	0.008
Bhutan	Brokpa	Naga	Pulliyar	0.535677	0.456	0.522	0.023	0.076	0.069	0.011
Bhutan	Bumthang	Naga	Pathan	0.151111	0.464	0.52	0.016	0.076	0.071	0.008
Bhutan	Bumthang	Naga	Sindhi	0.145206	0.465	0.519	0.016	0.076	0.071	0.008
Bhutan	Bumthang	Naga	Pulliyar	0.127035	0.473	0.506	0.02	0.075	0.067	0.011
Bhutan	Chali	Naga	Pathan	0.350511	0.265	0.7	0.035	0.091	0.085	0.009
Bhutan	Chali	Naga	Sindhi	0.322312	0.265	0.7	0.035	0.091	0.085	0.01
Bhutan	Chali	Naga	Pulliyar	0.179087	0.276	0.678	0.046	0.091	0.083	0.013
Nepal	Chamling	Naga	Pathan	0.381034	0.3	0.667	0.032	0.099	0.092	0.01
Nepal	Chamling	Naga	Sindhi	0.414026	0.297	0.67	0.033	0.098	0.092	0.01
Nepal	Chamling	Naga	Pulliyar	0.868651	0.288	0.662	0.05	0.093	0.084	0.013
Nepal	Chantyal	Naga	Pathan	1.08173e-05	0.396	0.485	0.118	0.1	0.093	0.009
Nepal	Chantyal	Naga	Sindhi	6.31902e-05	0.4	0.48	0.12	0.096	0.089	0.009
Nepal	Chantyal	Naga	Pulliyar	0.0922522	0.422	0.411	0.167	0.075	0.068	0.011
Nepal	Chepang	Naga	Pathan	0.00031388	0.2	0.684	0.116	0.123	0.113	0.012
Nepal	Chepang	Naga	Sindhi	0.000763166	0.179	0.701	0.12	0.121	0.112	0.012
Nepal	Chepang	Naga	Pulliyar	0.437819	0.246	0.589	0.165	0.091	0.082	0.014
Nepal	Chetri	Naga	Pathan	1.51789e-17	-0.532	0.85	0.682	0.291	0.271	0.022
Nepal	Chetri	Naga	Sindhi	9.92574e-12	-0.172	0.506	0.667	0.123	0.115	0.01
Nepal	Chetri	Naga	Pulliyar	1.03999e-23	9.559	-8.553	-0.007	11.797	10.655	1.147
Bhutan	Dakpa	Naga	Pathan	0.52651	0.495	0.457	0.047	0.131	0.123	0.014
Bhutan	Dakpa	Naga	Sindhi	0.513691	0.495	0.457	0.048	0.132	0.123	0.014
Bhutan	Dakpa	Naga	Pulliyar	0.167741	0.548	0.398	0.054	0.138	0.126	0.02
Nepal	Damai	Naga	Pathan	1.891e-34	-2.4	2.664	0.735	1.433	1.354	0.083
Nepal	Damai	Naga	Sindhi	1.35173e-32	-1.3	1.612	0.687	0.703	0.666	0.04
Nepal	Damai	Naga	Pulliyar	2.90753e-06	0.018	0.129	0.853	0.092	0.087	0.014
Nepal	Dhimal	Naga	Pathan	1.0834e-10	-0.825	1.59	0.235	0.216	0.201	0.019
Nepal	Dhimal	Naga	Sindhi	1.07654e-09	-0.766	1.53	0.236	0.198	0.184	0.018
Nepal	Dhimal	Naga	Pulliyar	0.0772825	-0.397	1.087	0.31	0.108	0.098	0.017
Nepal	Dumi	Naga	Pathan	0.356055	0.199	0.772	0.029	0.135	0.126	0.014
Nepal	Dumi	Naga	Sindhi	0.349966	0.197	0.773	0.03	0.135	0.126	0.014
Nepal	Dumi	Naga	Pulliyar	0.400206	0.184	0.773	0.042	0.135	0.123	0.02
Bhutan	Dzala	Naga	Pathan	0.296168	0.348	0.624	0.029	0.082	0.077	0.009
Bhutan	Dzala	Naga	Sindhi	0.290534	0.347	0.624	0.029	0.082	0.077	0.009
Bhutan	Dzala	Naga	Pulliyar	0.204953	0.354	0.609	0.037	0.082	0.074	0.012
Bhutan	Gongduk	Naga	Pathan	0.738847	0.225	0.738	0.037	0.097	0.09	0.01
Bhutan	Gongduk	Naga	Sindhi	0.732118	0.224	0.739	0.038	0.097	0.091	0.01
Bhutan	Gongduk	Naga	Pulliyar	0.576952	0.229	0.722	0.049	0.096	0.088	0.014
Nepal	Gurung	Naga	Pathan	0.00367539	0.23	0.673	0.097	0.09	0.084	0.009
Nepal	Gurung	Naga	Sindhi	0.0114187	0.233	0.668	0.099	0.088	0.081	0.009
Nepal	Gurung	Naga	Pulliyar	0.753389	0.274	0.59	0.136	0.072	0.065	0.011
Bhutan	Khengpa	Naga	Pathan	0.767702	0.234	0.726	0.04	0.081	0.076	0.008
Bhutan	Khengpa	Naga	Sindhi	0.784258	0.225	0.734	0.042	0.083	0.077	0.009
Bhutan	Khengpa	Naga	Pulliyar	0.882049	0.238	0.706	0.056	0.079	0.072	0.011
Nepal	Kulung	Naga	Pathan	0.60191	-0.036	0.996	0.04	0.139	0.131	0.014
Nepal	Kulung	Naga	Sindhi	0.619024	-0.04	0.999	0.041	0.14	0.132	0.014
Nepal	Kulung	Naga	Pulliyar	0.431288	-0.036	0.984	0.053	0.143	0.131	0.02
Bhutan	Kurtop	Naga	Pathan	0.529022	0.475	0.501	0.024	0.068	0.064	0.007
Bhutan	Kurtop	Naga	Sindhi	0.558471	0.473	0.502	0.025	0.068	0.064	0.008
Bhutan	Kurtop	Naga	Pulliyar	0.415368	0.479	0.488	0.032	0.069	0.063	0.011
Bhutan	Lakha	Naga	Pathan	0.105907	0.646	0.355	-0.001	0.086	0.08	0.009
Bhutan	Lakha	Naga	Sindhi	0.10794	0.651	0.351	-0.002	0.087	0.081	0.009
Bhutan	Lakha	Naga	Pulliyar	0.151718	0.686	0.325	-0.011	0.087	0.079	0.012
Bhutan	Layap	Naga	Pathan	0.30876	0.573	0.414	0.014	0.087	0.081	0.009
Bhutan	Layap	Naga	Sindhi	0.293403	0.574	0.413	0.013	0.087	0.081	0.01
Bhutan	Layap	Naga	Pulliyar	0.178365	0.615	0.377	0.008	0.088	0.079	0.013
China	Lhasa	Naga	Pathan	0.00414174	0.696	0.311	-0.006	0.065	0.061	0.006
China	Lhasa	Naga	Sindhi	0.00454796	0.701	0.307	-0.007	0.065	0.061	0.006
China	Lhasa	Naga	Pulliyar	0.0204313	0.736	0.281	-0.017	0.062	0.057	0.008
Nepal	Limbu	Naga	Pathan	0.486637	0.187	0.789	0.024	0.086	0.08	0.009
Nepal	Limbu	Naga	Sindhi	0.51789	0.185	0.79	0.025	0.086	0.08	0.009
Nepal	Limbu	Naga	Pulliyar	0.867405	0.183	0.78	0.037	0.082	0.075	0.012
Nepal	Magar	Naga	Pathan	5.7625e-05	0.02	0.873	0.107	0.119	0.11	0.011
Nepal	Magar	Naga	Sindhi	0.000182812	0.028	0.864	0.109	0.114	0.106	0.011
Nepal	Magar	Naga	Pulliyar	0.401373	0.12	0.732	0.148	0.085	0.078	0.012
Nepal	Majhi	Naga	Pathan	9.82006e-14	-0.808	1.482	0.326	0.324	0.301	0.026
Nepal	Majhi	Naga	Sindhi	2.9151e-12	-0.653	1.332	0.321	0.265	0.245	0.022
Nepal	Majhi	Naga	Pulliyar	0.638714	-0.05	0.652	0.397	0.093	0.085	0.014
Bhutan	Mangde	Naga	Pathan	0.704362	0.366	0.597	0.037	0.078	0.073	0.008
Bhutan	Mangde	Naga	Sindhi	0.649078	0.359	0.603	0.038	0.08	0.074	0.009
Bhutan	Mangde	Naga	Pulliyar	0.215045	0.378	0.574	0.048	0.079	0.071	0.012
Bhutan	Monpa	Naga	Pathan	0.838211	0.229	0.741	0.029	0.1	0.093	0.011
Bhutan	Monpa	Naga	Sindhi	0.830734	0.228	0.742	0.03	0.101	0.094	0.011
Bhutan	Monpa	Naga	Pulliyar	0.799712	0.23	0.729	0.041	0.102	0.092	0.016
Nepal	Nachiring	Naga	Pathan	0.0783699	0.144	0.821	0.035	0.176	0.164	0.019
Nepal	Nachiring	Naga	Sindhi	0.0847842	0.137	0.827	0.037	0.176	0.164	0.019
Nepal	Nachiring	Naga	Pulliyar	0.191062	0.082	0.853	0.065	0.171	0.154	0.027
China	Nagqu	Naga	Pathan	0.247141	0.324	0.647	0.028	0.074	0.069	0.008
China	Nagqu	Naga	Sindhi	0.207074	0.324	0.647	0.028	0.074	0.069	0.008
China	Nagqu	Naga	Pulliyar	0.0235151	0.343	0.625	0.032	0.076	0.069	0.011
Nepal	Newar	Naga	Pathan	3.30587e-13	-0.439	1.012	0.427	0.255	0.237	0.021
Nepal	Newar	Naga	Sindhi	3.08492e-10	-0.221	0.803	0.418	0.172	0.159	0.015
Nepal	Newar	Naga	Pulliyar	7.91431e-12	-0.045	0.497	0.548	0.174	0.157	0.02
Bhutan	Ngalop	Naga	Pathan	0.818652	0.283	0.661	0.056	0.075	0.07	0.008
Bhutan	Ngalop	Naga	Sindhi	0.807275	0.271	0.671	0.058	0.077	0.071	0.009
Bhutan	Ngalop	Naga	Pulliyar	0.175873	0.289	0.637	0.074	0.077	0.07	0.011
Bhutan	Nup	Naga	Pathan	0.1633	0.418	0.563	0.019	0.088	0.082	0.009
Bhutan	Nup	Naga	Sindhi	0.14868	0.417	0.564	0.019	0.09	0.084	0.009
Bhutan	Nup	Naga	Pulliyar	0.0791364	0.441	0.538	0.021	0.088	0.08	0.012
China	Nyingchi	Naga	Pathan	0.0392485	0.387	0.606	0.007	0.073	0.068	0.008
China	Nyingchi	Naga	Sindhi	0.0383322	0.388	0.605	0.007	0.073	0.068	0.008
China	Nyingchi	Naga	Pulliyar	0.0305979	0.412	0.584	0.004	0.073	0.066	0.011
Nepal	Puma	Naga	Pathan	0.276328	0.224	0.76	0.016	0.182	0.17	0.018
Nepal	Puma	Naga	Sindhi	0.279997	0.221	0.762	0.017	0.183	0.171	0.019
Nepal	Puma	Naga	Pulliyar	0.324977	0.193	0.778	0.028	0.184	0.167	0.026
Nepal	Sampang	Naga	Pathan	0.261422	0.348	0.632	0.02	0.129	0.121	0.012
Nepal	Sampang	Naga	Sindhi	0.264806	0.345	0.635	0.02	0.131	0.122	0.013
Nepal	Sampang	Naga	Pulliyar	0.431994	0.323	0.643	0.034	0.125	0.114	0.017
Nepal	Sarki	Naga	Pathan	4.91729e-14	-0.132	0.626	0.507	0.143	0.135	0.013
Nepal	Sarki	Naga	Sindhi	1.00353e-09	-0.113	0.595	0.518	0.111	0.104	0.012
Nepal	Sarki	Naga	Pulliyar	6.7593e-14	0.079	0.24	0.681	0.153	0.141	0.019
China	Shannan	Naga	Pathan	0.178858	0.729	0.271	0.001	0.056	0.052	0.006
China	Shannan	Naga	Sindhi	0.178706	0.731	0.269	0	0.056	0.053	0.006
China	Shannan	Naga	Pulliyar	0.208258	0.75	0.254	-0.004	0.056	0.051	0.009
Nepal	Sherpa_Arciero	Naga	Pathan	0.716509	0.8	0.205	-0.006	0.084	0.078	0.009
Nepal	Sherpa_Arciero	Naga	Sindhi	0.723641	0.802	0.204	-0.006	0.084	0.079	0.009
Nepal	Sherpa_Arciero	Naga	Pulliyar	0.806243	0.815	0.196	-0.012	0.086	0.078	0.013
Nepal	Sonar	Naga	Pathan	1.27045e-21	-0.182	0.596	0.586	0.189	0.18	0.016
Nepal	Sonar	Naga	Sindhi	2.23029e-17	-0.135	0.544	0.59	0.164	0.156	0.016
Nepal	Sonar	Naga	Pulliyar	0.000433221	0.065	0.129	0.806	0.103	0.096	0.02
Nepal	Sunwar	Naga	Pathan	0.271333	0.051	0.862	0.087	0.116	0.11	0.011
Nepal	Sunwar	Naga	Sindhi	0.245152	0.048	0.864	0.089	0.117	0.11	0.012
Nepal	Sunwar	Naga	Pulliyar	0.0938366	0.052	0.825	0.123	0.117	0.109	0.016
Nepal	Tamang	Naga	Pathan	4.22545e-09	0.098	0.708	0.194	0.137	0.127	0.011
Nepal	Tamang	Naga	Sindhi	1.25147e-07	0.136	0.669	0.194	0.121	0.113	0.011
Nepal	Tamang	Naga	Pulliyar	0.00512485	0.275	0.468	0.257	0.08	0.073	0.011
Nepal	Thakali	Naga	Pathan	0.0239507	0.817	0.092	0.091	0.082	0.076	0.009
Nepal	Thakali	Naga	Sindhi	0.0377472	0.81	0.097	0.093	0.08	0.074	0.009
Nepal	Thakali	Naga	Pulliyar	0.00135095	0.845	0.033	0.122	0.094	0.085	0.013
China	Tibetan	Naga	Pathan	0.216221	0.577	0.422	0.001	0.059	0.055	0.006
China	Tibetan	Naga	Sindhi	0.214862	0.579	0.42	0.001	0.06	0.056	0.006
China	Tibetan	Naga	Pulliyar	0.239938	0.6	0.403	-0.003	0.06	0.054	0.009
China	Tingri	Naga	Pathan	0.0219729	0.809	0.198	-0.008	0.072	0.066	0.007
China	Tingri	Naga	Sindhi	0.0246955	0.815	0.193	-0.008	0.072	0.067	0.007
China	Tingri	Naga	Pulliyar	0.0903966	0.854	0.165	-0.02	0.07	0.063	0.01
India	Toto	Naga	Pathan	8.13642e-08	-0.749	1.591	0.158	0.218	0.204	0.02
India	Toto	Naga	Sindhi	3.01556e-07	-0.731	1.571	0.16	0.21	0.196	0.019
India	Toto	Naga	Pulliyar	0.018679	-0.507	1.284	0.222	0.148	0.136	0.021
Bhutan	Tshangla	Naga	Pathan	0.936728	0.192	0.763	0.045	0.081	0.075	0.009
Bhutan	Tshangla	Naga	Sindhi	0.92664	0.19	0.764	0.046	0.081	0.076	0.009
Bhutan	Tshangla	Naga	Pulliyar	0.537764	0.195	0.745	0.06	0.082	0.074	0.012
Nepal	Wambule	Naga	Pathan	0.19556	0.244	0.736	0.02	0.099	0.093	0.01
Nepal	Wambule	Naga	Sindhi	0.208384	0.241	0.738	0.02	0.099	0.093	0.01
Nepal	Wambule	Naga	Pulliyar	0.533809	0.226	0.739	0.034	0.093	0.084	0.013
Nepal	Bahing	YR_MN	Pathan	0.506755	0.463	0.541	-0.004	0.117	0.11	0.016
Nepal	Bahing	YR_MN	Sindhi	0.51067	0.465	0.54	-0.004	0.118	0.11	0.017
Nepal	Bahing	YR_MN	Pulliyar	0.53589	0.471	0.538	-0.009	0.122	0.11	0.024
Nepal	Bantawa	YR_MN	Pathan	0.0863654	0.537	0.469	-0.006	0.094	0.086	0.013
Nepal	Bantawa	YR_MN	Sindhi	0.0841835	0.533	0.472	-0.005	0.095	0.087	0.014
Nepal	Bantawa	YR_MN	Pulliyar	0.0816849	0.495	0.5	0.006	0.096	0.085	0.019
Nepal	Baram	YR_MN	Pathan	2.16463e-06	0.377	0.494	0.13	0.074	0.067	0.011
Nepal	Baram	YR_MN	Sindhi	1.30636e-05	0.377	0.491	0.133	0.071	0.064	0.011
Nepal	Baram	YR_MN	Pulliyar	0.0453499	0.377	0.436	0.187	0.058	0.051	0.013
India	Bodo	YR_MN	Pathan	3.25559e-11	-0.035	0.813	0.222	0.12	0.108	0.016
India	Bodo	YR_MN	Sindhi	1.87697e-09	-0.031	0.802	0.229	0.111	0.099	0.015
India	Bodo	YR_MN	Pulliyar	0.90913	0.151	0.557	0.292	0.059	0.052	0.013
Bhutan	Brokkat	YR_MN	Pathan	0.299859	0.8	0.215	-0.015	0.051	0.047	0.007
Bhutan	Brokkat	YR_MN	Sindhi	0.316595	0.802	0.213	-0.015	0.051	0.046	0.007
Bhutan	Brokkat	YR_MN	Pulliyar	0.536253	0.818	0.207	-0.025	0.051	0.045	0.01
Bhutan	Brokpa	YR_MN	Pathan	0.346871	0.667	0.329	0.005	0.051	0.047	0.007
Bhutan	Brokpa	YR_MN	Sindhi	0.350581	0.666	0.329	0.005	0.051	0.047	0.008
Bhutan	Brokpa	YR_MN	Pulliyar	0.354892	0.666	0.328	0.006	0.053	0.046	0.011
Bhutan	Bumthang	YR_MN	Pathan	0.00750378	0.693	0.304	0.003	0.05	0.045	0.007
Bhutan	Bumthang	YR_MN	Sindhi	0.00748593	0.693	0.304	0.003	0.05	0.045	0.008
Bhutan	Bumthang	YR_MN	Pulliyar	0.00800346	0.69	0.305	0.004	0.051	0.044	0.011
Bhutan	Chali	YR_MN	Pathan	0.26359	0.554	0.428	0.019	0.055	0.05	0.008
Bhutan	Chali	YR_MN	Sindhi	0.257076	0.554	0.428	0.019	0.055	0.051	0.009
Bhutan	Chali	YR_MN	Pulliyar	0.22303	0.555	0.421	0.024	0.055	0.049	0.011
Nepal	Chamling	YR_MN	Pathan	0.235094	0.582	0.401	0.018	0.06	0.055	0.009
Nepal	Chamling	YR_MN	Sindhi	0.253795	0.579	0.403	0.018	0.06	0.055	0.009
Nepal	Chamling	YR_MN	Pulliyar	0.591457	0.555	0.413	0.032	0.061	0.054	0.012
Nepal	Chantyal	YR_MN	Pathan	1.21857e-06	0.632	0.263	0.104	0.055	0.051	0.008
Nepal	Chantyal	YR_MN	Sindhi	6.9688e-06	0.63	0.264	0.107	0.054	0.05	0.008
Nepal	Chantyal	YR_MN	Pulliyar	0.0554483	0.593	0.251	0.156	0.048	0.043	0.01
Nepal	Chepang	YR_MN	Pathan	5.25817e-05	0.499	0.402	0.099	0.077	0.07	0.011
Nepal	Chepang	YR_MN	Sindhi	0.000139522	0.48	0.416	0.104	0.077	0.069	0.011
Nepal	Chepang	YR_MN	Pulliyar	0.351019	0.47	0.38	0.15	0.062	0.055	0.013
Nepal	Chetri	YR_MN	Pathan	2.93658e-24	-0.112	0.451	0.661	0.221	0.2	0.022
Nepal	Chetri	YR_MN	Sindhi	5.4887e-14	0.087	0.261	0.652	0.063	0.057	0.008
Nepal	Chetri	YR_MN	Pulliyar	1.92777e-31	6.006	-5.172	0.166	6.716	5.906	0.815
Bhutan	Dakpa	YR_MN	Pathan	0.71971	0.66	0.301	0.039	0.084	0.077	0.013
Bhutan	Dakpa	YR_MN	Sindhi	0.718648	0.659	0.301	0.039	0.084	0.078	0.013
Bhutan	Dakpa	YR_MN	Pulliyar	0.371041	0.672	0.281	0.046	0.09	0.08	0.019
Nepal	Damai	YR_MN	Pathan	3.26907e-34	-3.388	3.479	0.909	2.008	1.834	0.179
Nepal	Damai	YR_MN	Sindhi	1.57681e-33	-2.157	2.342	0.815	1.303	1.189	0.118
Nepal	Damai	YR_MN	Pulliyar	2.44423e-06	0.06	0.087	0.852	0.071	0.065	0.014
Nepal	Dhimal	YR_MN	Pathan	9.36373e-14	-0.311	1.083	0.228	0.161	0.146	0.02
Nepal	Dhimal	YR_MN	Sindhi	2.15859e-12	-0.257	1.029	0.228	0.145	0.131	0.019
Nepal	Dhimal	YR_MN	Pulliyar	0.187681	0.003	0.708	0.288	0.073	0.063	0.015
Nepal	Dumi	YR_MN	Pathan	0.137665	0.512	0.474	0.014	0.092	0.084	0.013
Nepal	Dumi	YR_MN	Sindhi	0.137663	0.511	0.474	0.014	0.092	0.085	0.013
Nepal	Dumi	YR_MN	Pulliyar	0.159002	0.497	0.48	0.022	0.096	0.084	0.019
Bhutan	Dzala	YR_MN	Pathan	0.496324	0.599	0.386	0.015	0.052	0.047	0.008
Bhutan	Dzala	YR_MN	Sindhi	0.496484	0.598	0.386	0.015	0.052	0.048	0.008
Bhutan	Dzala	YR_MN	Pulliyar	0.466369	0.596	0.384	0.02	0.053	0.047	0.011
Bhutan	Gongduk	YR_MN	Pathan	0.179191	0.534	0.446	0.02	0.062	0.056	0.009
Bhutan	Gongduk	YR_MN	Sindhi	0.181995	0.533	0.446	0.021	0.062	0.056	0.009
Bhutan	Gongduk	YR_MN	Pulliyar	0.199421	0.528	0.443	0.028	0.062	0.055	0.013
Nepal	Gurung	YR_MN	Pathan	0.000185202	0.52	0.397	0.083	0.057	0.051	0.008
Nepal	Gurung	YR_MN	Sindhi	0.000639467	0.518	0.397	0.085	0.055	0.05	0.008
Nepal	Gurung	YR_MN	Pulliyar	0.334241	0.511	0.37	0.119	0.048	0.042	0.01
Bhutan	Khengpa	YR_MN	Pathan	0.105487	0.537	0.44	0.023	0.05	0.046	0.008
Bhutan	Khengpa	YR_MN	Sindhi	0.11268	0.532	0.443	0.024	0.051	0.046	0.008
Bhutan	Khengpa	YR_MN	Pulliyar	0.21525	0.527	0.439	0.035	0.05	0.045	0.01
Nepal	Kulung	YR_MN	Pathan	0.298926	0.342	0.639	0.019	0.091	0.085	0.013
Nepal	Kulung	YR_MN	Sindhi	0.305768	0.34	0.641	0.02	0.091	0.085	0.013
Nepal	Kulung	YR_MN	Pulliyar	0.276844	0.338	0.637	0.025	0.094	0.085	0.018
Bhutan	Kurtop	YR_MN	Pathan	0.0628766	0.692	0.297	0.011	0.046	0.043	0.007
Bhutan	Kurtop	YR_MN	Sindhi	0.065562	0.691	0.298	0.011	0.047	0.043	0.007
Bhutan	Kurtop	YR_MN	Pulliyar	0.0718107	0.688	0.297	0.016	0.048	0.042	0.01
Bhutan	Lakha	YR_MN	Pathan	0.163651	0.776	0.231	-0.008	0.058	0.053	0.008
Bhutan	Lakha	YR_MN	Sindhi	0.172905	0.78	0.228	-0.008	0.059	0.054	0.008
Bhutan	Lakha	YR_MN	Pulliyar	0.308453	0.801	0.217	-0.018	0.059	0.052	0.011
Bhutan	Layap	YR_MN	Pathan	0.134925	0.748	0.248	0.004	0.056	0.051	0.009
Bhutan	Layap	YR_MN	Sindhi	0.13287	0.749	0.247	0.004	0.057	0.051	0.009
Bhutan	Layap	YR_MN	Pulliyar	0.130652	0.769	0.232	-0.002	0.057	0.049	0.012
China	Lhasa	YR_MN	Pathan	0.00251086	0.826	0.187	-0.013	0.04	0.037	0.005
China	Lhasa	YR_MN	Sindhi	0.00297324	0.83	0.184	-0.014	0.04	0.037	0.005
China	Lhasa	YR_MN	Pulliyar	0.017868	0.849	0.175	-0.024	0.04	0.035	0.007
Nepal	Limbu	YR_MN	Pathan	0.134714	0.514	0.479	0.007	0.056	0.051	0.008
Nepal	Limbu	YR_MN	Sindhi	0.140139	0.512	0.481	0.007	0.056	0.051	0.008
Nepal	Limbu	YR_MN	Pulliyar	0.245178	0.491	0.493	0.017	0.057	0.05	0.012
Nepal	Magar	YR_MN	Pathan	1.32459e-05	0.424	0.492	0.084	0.068	0.061	0.009
Nepal	Magar	YR_MN	Sindhi	4.86576e-05	0.421	0.492	0.086	0.066	0.06	0.009
Nepal	Magar	YR_MN	Pulliyar	0.476148	0.418	0.456	0.126	0.053	0.047	0.011
Nepal	Majhi	YR_MN	Pathan	1.08461e-19	-0.28	0.971	0.309	0.253	0.228	0.028
Nepal	Majhi	YR_MN	Sindhi	1.34877e-17	-0.145	0.843	0.302	0.201	0.18	0.023
Nepal	Majhi	YR_MN	Pulliyar	0.917134	0.209	0.413	0.378	0.058	0.051	0.012
Bhutan	Mangde	YR_MN	Pathan	0.1173	0.608	0.368	0.024	0.051	0.046	0.008
Bhutan	Mangde	YR_MN	Sindhi	0.111358	0.604	0.371	0.025	0.052	0.047	0.008
Bhutan	Mangde	YR_MN	Pulliyar	0.069193	0.603	0.365	0.032	0.052	0.046	0.011
Bhutan	Monpa	YR_MN	Pathan	0.663814	0.53	0.457	0.014	0.066	0.06	0.01
Bhutan	Monpa	YR_MN	Sindhi	0.669747	0.529	0.457	0.014	0.067	0.06	0.01
Bhutan	Monpa	YR_MN	Pulliyar	0.759657	0.52	0.458	0.021	0.068	0.059	0.015
Nepal	Nachiring	YR_MN	Pathan	0.0945101	0.465	0.516	0.018	0.113	0.104	0.017
Nepal	Nachiring	YR_MN	Sindhi	0.0987673	0.461	0.519	0.02	0.113	0.104	0.017
Nepal	Nachiring	YR_MN	Pulliyar	0.170981	0.422	0.538	0.04	0.113	0.1	0.025
China	Nagqu	YR_MN	Pathan	0.0109041	0.592	0.395	0.013	0.047	0.043	0.007
China	Nagqu	YR_MN	Sindhi	0.00996267	0.592	0.395	0.013	0.047	0.043	0.007
China	Nagqu	YR_MN	Pulliyar	0.00438666	0.604	0.384	0.012	0.048	0.042	0.009
Nepal	Newar	YR_MN	Pathan	2.90992e-20	0.003	0.594	0.403	0.304	0.275	0.03
Nepal	Newar	YR_MN	Sindhi	9.01906e-15	0.192	0.415	0.393	0.121	0.109	0.013
Nepal	Newar	YR_MN	Pulliyar	1.44467e-12	0.177	0.293	0.53	0.098	0.089	0.013
Bhutan	Ngalop	YR_MN	Pathan	0.0709746	0.554	0.406	0.041	0.049	0.044	0.007
Bhutan	Ngalop	YR_MN	Sindhi	0.07281	0.547	0.411	0.042	0.05	0.045	0.008
Bhutan	Ngalop	YR_MN	Pulliyar	0.0356205	0.55	0.395	0.055	0.049	0.043	0.01
Bhutan	Nup	YR_MN	Pathan	0.253031	0.642	0.351	0.007	0.052	0.048	0.008
Bhutan	Nup	YR_MN	Sindhi	0.247201	0.642	0.351	0.007	0.053	0.048	0.008
Bhutan	Nup	YR_MN	Pulliyar	0.21887	0.649	0.344	0.007	0.054	0.047	0.011
China	Nyingchi	YR_MN	Pathan	0.000451653	0.64	0.366	-0.006	0.051	0.047	0.007
China	Nyingchi	YR_MN	Sindhi	0.000462284	0.641	0.365	-0.006	0.052	0.047	0.007
China	Nyingchi	YR_MN	Pulliyar	0.000670839	0.654	0.358	-0.012	0.053	0.047	0.01
Nepal	Puma	YR_MN	Pathan	0.0866803	0.554	0.448	-0.002	0.124	0.114	0.017
Nepal	Puma	YR_MN	Sindhi	0.0865277	0.553	0.449	-0.002	0.124	0.114	0.017
Nepal	Puma	YR_MN	Pulliyar	0.0888656	0.534	0.464	0.003	0.131	0.115	0.025
Nepal	Sampang	YR_MN	Pathan	0.422994	0.597	0.396	0.007	0.076	0.069	0.011
Nepal	Sampang	YR_MN	Sindhi	0.427305	0.596	0.397	0.007	0.077	0.07	0.012
Nepal	Sampang	YR_MN	Pulliyar	0.557906	0.573	0.41	0.017	0.077	0.068	0.016
Nepal	Sarki	YR_MN	Pathan	7.36112e-18	0.197	0.311	0.492	0.094	0.087	0.012
Nepal	Sarki	YR_MN	Sindhi	5.75901e-13	0.168	0.327	0.505	0.077	0.07	0.011
Nepal	Sarki	YR_MN	Pulliyar	7.58326e-14	0.169	0.156	0.675	0.092	0.084	0.016
China	Shannan	YR_MN	Pathan	0.0455156	0.849	0.157	-0.006	0.039	0.036	0.006
China	Shannan	YR_MN	Sindhi	0.0478297	0.851	0.156	-0.006	0.039	0.036	0.006
China	Shannan	YR_MN	Pulliyar	0.0724839	0.86	0.151	-0.012	0.04	0.035	0.008
Nepal	Sherpa_Arciero	YR_MN	Pathan	0.58333	0.891	0.12	-0.011	0.053	0.049	0.008
Nepal	Sherpa_Arciero	YR_MN	Sindhi	0.593559	0.892	0.119	-0.011	0.053	0.049	0.008
Nepal	Sherpa_Arciero	YR_MN	Pulliyar	0.676121	0.902	0.116	-0.018	0.056	0.05	0.011
Nepal	Sonar	YR_MN	Pathan	5.9589e-24	0.149	0.282	0.569	0.106	0.099	0.014
Nepal	Sonar	YR_MN	Sindhi	3.25214e-19	0.148	0.276	0.576	0.095	0.089	0.014
Nepal	Sonar	YR_MN	Pulliyar	0.000337437	0.119	0.076	0.804	0.073	0.067	0.02
Nepal	Sunwar	YR_MN	Pathan	0.113472	0.373	0.554	0.074	0.078	0.072	0.011
Nepal	Sunwar	YR_MN	Sindhi	0.117532	0.369	0.556	0.075	0.078	0.072	0.011
Nepal	Sunwar	YR_MN	Pulliyar	0.130841	0.344	0.548	0.108	0.078	0.07	0.016
Nepal	Tamang	YR_MN	Pathan	1.00897e-11	0.484	0.343	0.174	0.074	0.067	0.009
Nepal	Tamang	YR_MN	Sindhi	1.54267e-09	0.485	0.339	0.176	0.064	0.058	0.009
Nepal	Tamang	YR_MN	Pulliyar	0.00353946	0.468	0.29	0.241	0.048	0.043	0.009
Nepal	Thakali	YR_MN	Pathan	0.0286662	0.848	0.063	0.09	0.05	0.046	0.008
Nepal	Thakali	YR_MN	Sindhi	0.0453162	0.843	0.066	0.091	0.05	0.045	0.008
Nepal	Thakali	YR_MN	Pulliyar	0.00178229	0.836	0.04	0.124	0.058	0.051	0.011
China	Tibetan	YR_MN	Pathan	0.0497903	0.762	0.247	-0.009	0.038	0.035	0.005
China	Tibetan	YR_MN	Sindhi	0.0538101	0.764	0.246	-0.01	0.038	0.035	0.006
China	Tibetan	YR_MN	Pulliyar	0.100142	0.777	0.24	-0.017	0.039	0.035	0.008
China	Tingri	YR_MN	Pathan	0.028941	0.886	0.125	-0.011	0.046	0.042	0.006
China	Tingri	YR_MN	Sindhi	0.0335312	0.889	0.123	-0.012	0.046	0.042	0.006
China	Tingri	YR_MN	Pulliyar	0.129838	0.913	0.11	-0.023	0.046	0.04	0.009
India	Toto	YR_MN	Pathan	2.84623e-09	-0.097	0.967	0.13	0.139	0.125	0.018
India	Toto	YR_MN	Sindhi	1.2345e-08	-0.093	0.96	0.133	0.134	0.121	0.018
India	Toto	YR_MN	Pulliyar	0.00460998	-0.027	0.833	0.194	0.101	0.089	0.02
Bhutan	Tshangla	YR_MN	Pathan	0.366353	0.5	0.472	0.028	0.052	0.047	0.008
Bhutan	Tshangla	YR_MN	Sindhi	0.378869	0.499	0.473	0.028	0.052	0.047	0.008
Bhutan	Tshangla	YR_MN	Pulliyar	0.381193	0.495	0.467	0.039	0.052	0.046	0.011
Nepal	Wambule	YR_MN	Pathan	0.0149797	0.567	0.43	0.003	0.066	0.06	0.009
Nepal	Wambule	YR_MN	Sindhi	0.0153465	0.563	0.433	0.004	0.066	0.06	0.009
Nepal	Wambule	YR_MN	Pulliyar	0.0288588	0.529	0.456	0.016	0.067	0.059	0.013

## Sheet: SD10
Supplementary Data 10. Top 100 variants in the peak window overlapping the EGLN1 region from the genome-wide selection scan. We report allele frequencies of the 100 variants in present-day Tibetans, 1000 Genomes project Han Chinese from Beijing (CHB), and aMMD, along with LD between these variants and the two nonsynonymous SNPs rs12097901 and rs186996510. REF/ALT/ANC represent reference, alternat…
		Allele info			ALT frequency			aMMD		r2 in present-day Tibetan with
SNP	POS	REF	ALT	ANC	Tibetan	CHB	aMMD	ALT/Total	f3	rs12097901	rs186996510
rs75768180	231396884	A	G	A	0.759	0.199	0.333	5/15	0.235	0.2127	0.4781
rs2486737	231520523	T	C	T	0.13	0.558	0.588	10/17	0.194	0.364	0.2111
rs2790892	231512771	G	A	G	0.13	0.558	0.588	10/17	0.194	0.364	0.2111
rs6674439	231392422	C	T	C	0.889	0.5	0.4	4/10	0.188	0.1052	0.0987
rs6689655	231392436	T	G	G	0.907	0.612	0.273	3/11	0.186	0.0454	0.0373
rs2474625	231519331	A	G	G	0.13	0.558	0.529	9/17	0.169	0.364	0.2111
rs2247124	231493687	A	G	A	0.13	0.539	0.533	8/15	0.163	0.3809	0.2722
rs2808596	231530723	A	G	G	0.13	0.558	0.5	8/16	0.157	0.364	0.2111
rs10489610	231517765	C	A	C	0.13	0.558	0.5	8/16	0.157	0.364	0.2111
rs2808584	231512925	A	G	G	0.13	0.558	0.5	8/16	0.157	0.364	0.2111
rs2790877	231535427	A	G	A	0.13	0.544	0.5	8/16	0.151	0.2944	0.1268
rs2749710	231535112	G	T	G	0.13	0.539	0.5	8/16	0.149	0.364	0.2111
rs2491416	231547335	T	C	C	0.87	0.442	0.529	9/17	0.144	0.364	0.2111
rs2790880	231534259	C	T	T	0.13	0.558	0.471	8/17	0.144	0.364	0.2111
rs2437148	231513979	A	G	G	0.13	0.558	0.471	8/17	0.144	0.364	0.2111
rs2572252	231513653	T	C	T	0.13	0.558	0.471	8/17	0.144	0.364	0.2111
rs2491404	231512127	C	T	C	0.13	0.558	0.471	8/17	0.144	0.364	0.2111
rs2250719	231486208	G	A	A	0.13	0.558	0.471	8/17	0.144	0.364	0.2111
rs78561501	231448497	G	A	G	0.796	0.238	0.533	8/15	0.144	0.2809	0.401
rs567264	231407716	A	G	G	0.907	0.612	0.417	5/12	0.144	0.0454	0.0373
rs2808599	231533482	T	C	C	0.13	0.558	0.467	7/15	0.142	0.364	0.2111
rs2790893	231508976	T	G	T	0.13	0.558	0.467	7/15	0.142	0.364	0.2111
rs2808581	231509423	C	T	T	0.13	0.549	0.471	8/17	0.141	0.364	0.2111
rs2761583	231379909	C	T	C	0.852	0.505	0.438	7/16	0.141	0.0723	0.0938
rs2790878	231534390	T	C	C	0.13	0.544	0.471	8/17	0.139	0.364	0.2111
rs2808615	231550171	G	A	A	0.87	0.461	0.529	9/17	0.137	0.364	0.2111
rs2808614	231550168	A	G	G	0.87	0.461	0.529	9/17	0.137	0.364	0.2111
rs2790867	231548059	A	C	C	0.87	0.461	0.529	9/17	0.137	0.364	0.2111
rs973254	231521149	T	A	T	0.13	0.539	0.471	8/17	0.137	0.364	0.2111
rs1435166	231502310	T	C	T	0.13	0.539	0.471	8/17	0.137	0.364	0.2111
rs2250734	231485958	G	A	G	0.13	0.539	0.471	8/17	0.137	0.364	0.2111
rs12745333	231394888	G	T	G	0.907	0.597	0.462	6/13	0.137	0.0454	0.0373
rs569668	231417385	T	A	A	0.111	0.495	0.471	8/17	0.136	0.1052	0.0987
rs6659323	231509450	A	G	G	0.13	0.49	0.5	8/16	0.131	0.364	0.2111
rs2491411	231533448	C	G	G	0.13	0.558	0.438	7/16	0.13	0.364	0.2111
rs2256908	231506557	G	A	A	0.13	0.558	0.438	7/16	0.13	0.364	0.2111
rs2749717	231489353	G	T	T	0.13	0.558	0.438	7/16	0.13	0.364	0.2111
rs722302	231480152	A	C	C	0.13	0.558	0.438	7/16	0.13	0.364	0.2111
rs116931767	231323568	A	C	A	0.722	0.121	0.5	8/16	0.13	0.0536	0.3445
rs576462	231544607	C	T	T	0.13	0.583	0.412	7/17	0.126	0.2944	0.1268
rs503633	231389097	T	C	T	0.889	0.5	0.562	9/16	0.125	0.1052	0.0987
rs2739508	231526797	C	T	c	0.056	0.466	0.357	5/14	0.123	0.3675	0.2038
rs2749714	231538634	G	C	G	0.13	0.544	0.429	6/14	0.122	0.2944	0.1268
rs2790876	231536033	C	T	T	0.13	0.544	0.429	6/14	0.122	0.2944	0.1268
rs11122272	231470772	A	G	A	0.111	0.519	0.412	7/17	0.121	0.2408	0.1519
rs10489609	231470650	T	C	T	0.111	0.519	0.412	7/17	0.121	0.2408	0.1519
rs2790883	231532726	A	G	G	0.13	0.558	0.412	7/17	0.119	0.364	0.2111
rs2808598	231532725	C	T	C	0.13	0.558	0.412	7/17	0.119	0.364	0.2111
rs2790884	231531932	A	G	a	0.13	0.558	0.412	7/17	0.119	0.364	0.2111
rs2749702	231523808	A	G	G	0.13	0.558	0.412	7/17	0.119	0.364	0.2111
rs2808592	231523757	G	A	A	0.13	0.558	0.412	7/17	0.119	0.364	0.2111
rs2790887	231523724	G	C	C	0.13	0.558	0.412	7/17	0.119	0.364	0.2111
rs2790889	231520240	C	A	C	0.13	0.558	0.412	7/17	0.119	0.364	0.2111
rs2486740	231517552	T	C	C	0.13	0.558	0.412	7/17	0.119	0.364	0.2111
rs2491405	231513431	C	A	A	0.13	0.558	0.412	7/17	0.119	0.364	0.2111
rs910824	231498773	C	G	G	0.13	0.558	0.412	7/17	0.119	0.364	0.2111
rs910823	231498766	G	T	G	0.13	0.558	0.412	7/17	0.119	0.364	0.2111
rs2474633	231486989	A	C	C	0.13	0.558	0.412	7/17	0.119	0.364	0.2111
rs2011357	231480208	A	G	G	0.13	0.558	0.412	7/17	0.119	0.364	0.2111
rs525427	231403966	A	G	G	0.907	0.612	0.5	7/14	0.119	0.0454	0.0373
rs11122279	231519804	A	G	G	0.13	0.553	0.412	7/17	0.117	0.364	0.2111
rs2486725	231540288	G	C	C	0.13	0.544	0.412	7/17	0.115	0.2944	0.1268
rs1416916	231533027	A	G	A	0.13	0.558	0.4	6/15	0.114	0.364	0.2111
rs78172021	231525160	A	T		0.13	0.558	0.4	6/15	0.114	0.364	0.2111
rs2790890	231514567	C	T	T	0.13	0.558	0.4	6/15	0.114	0.364	0.2111
rs2749716	231486908	T	C	C	0.13	0.558	0.4	6/15	0.114	0.364	0.2111
rs11805033	231546452	T	C	T	0.87	0.403	0.625	10/16	0.113	0.364	0.2111
rs2491410	231532287	C	T	C	0.13	0.539	0.412	7/17	0.113	0.364	0.2111
rs2437150	231488524	C	T	C	0.13	0.539	0.412	7/17	0.113	0.364	0.2111
rs4486439	231477470	C	T	C	0.13	0.539	0.412	7/17	0.113	0.364	0.2111
rs532163	231416401	A	G	G	0.093	0.398	0.462	6/13	0.111	0.0454	0.0373
rs999010	231495316	A	G	A	0.13	0.539	0.4	6/15	0.109	0.364	0.2111
rs2474630	231535335	G	A	G	0.148	0.563	0.412	7/17	0.107	0.3272	0.1744
rs2749712	231537751	T	A	T	0.111	0.544	0.357	5/14	0.105	0.2317	0.1059
rs2790881	231534181	A	G	A	0.13	0.558	0.375	6/16	0.103	0.364	0.2111
rs2749709	231530476	G	T	T	0.13	0.558	0.375	6/16	0.103	0.364	0.2111
rs2248652	231527787	G	A	A	0.13	0.558	0.375	6/16	0.103	0.364	0.2111
rs116328462	231525158	A	T	T	0.13	0.519	0.4	6/15	0.103	0.364	0.2111
rs2808593	231524228	G	T	t	0.13	0.558	0.375	6/16	0.103	0.364	0.2111
rs2486736	231521478	C	T	T	0.13	0.558	0.375	6/16	0.103	0.364	0.2111
rs2808580	231509259	A	G	A	0.13	0.558	0.375	6/16	0.103	0.364	0.2111
rs7414807	231476874	G	A	A	0.13	0.553	0.375	6/16	0.102	0.364	0.2111
rs548963	231395152	T	G	G	0.907	0.612	0.562	9/16	0.1	0.0454	0.0373
rs490480	231418478	T	G	g	0.111	0.495	0.375	6/16	0.099	0.1052	0.0987
rs1298555	231392194	C	T	c	0.907	0.597	0.583	7/12	0.099	0.0454	0.0373
rs9431945	231295246	G	A	A	0.37	0.641	0.75	12/16	0.098	0.017	0.0396
rs522246	231392169	T	A	t	0.907	0.597	0.588	10/17	0.097	0.0454	0.0373
rs572268	231384255	T	C	T	0.907	0.597	0.588	10/17	0.097	0.0454	0.0373
rs865393	231404328	C	T	C	0.889	0.5	0.636	7/11	0.096	0.1052	0.0987
rs2739515	231514681	G	A	G	0.13	0.558	0.357	5/14	0.095	0.364	0.2111
rs2808583	231512587	G	C	G	0.13	0.563	0.353	6/17	0.095	0.364	0.2111
rs2066140	231504311	G	C	G	0.13	0.558	0.357	5/14	0.095	0.364	0.2111
rs6541266	231459478	A	G	A	0.111	0.51	0.353	6/17	0.095	0.2408	0.1519
rs34697173	231185006	C	T	C	0.074	0.413	0.357	5/14	0.095	0.012	0.0875
rs2808600	231534723	T	C	T	0.13	0.558	0.353	6/17	0.094	0.364	0.2111
rs2486731	231532511	A	G	G	0.13	0.558	0.353	6/17	0.094	0.364	0.2111
rs973253	231520874	C	T	T	0.13	0.558	0.353	6/17	0.094	0.364	0.2111
rs973252	231520802	A	G	A	0.13	0.558	0.353	6/17	0.094	0.364	0.2111
rs574553	231401902	G	A	A	0.907	0.612	0.583	7/12	0.094	0.0454	0.0373
rs11122256	231378504	G	A	g	0.907	0.597	0.6	9/15	0.094	0.0454	0.0373

[truncated: 1 more sheets: SD11]
